# Supplementary material
Source: MDPI journal article supplement (https://www.mdpi.com/1424-2818/13/10/497)
Supplement: s1 [file s1]

Archive with 2 entries (2 files):
- Supp_File1_phylogenetic_trees_20211011.pdf
- Supp_File2_ignore_gaps_simplots_20210616.pdf
