# Supplementary material
Source: MDPI journal article supplement (https://www.mdpi.com/1424-2818/13/10/497)
Supplement: s1 [file s1]

Rec. seq 1

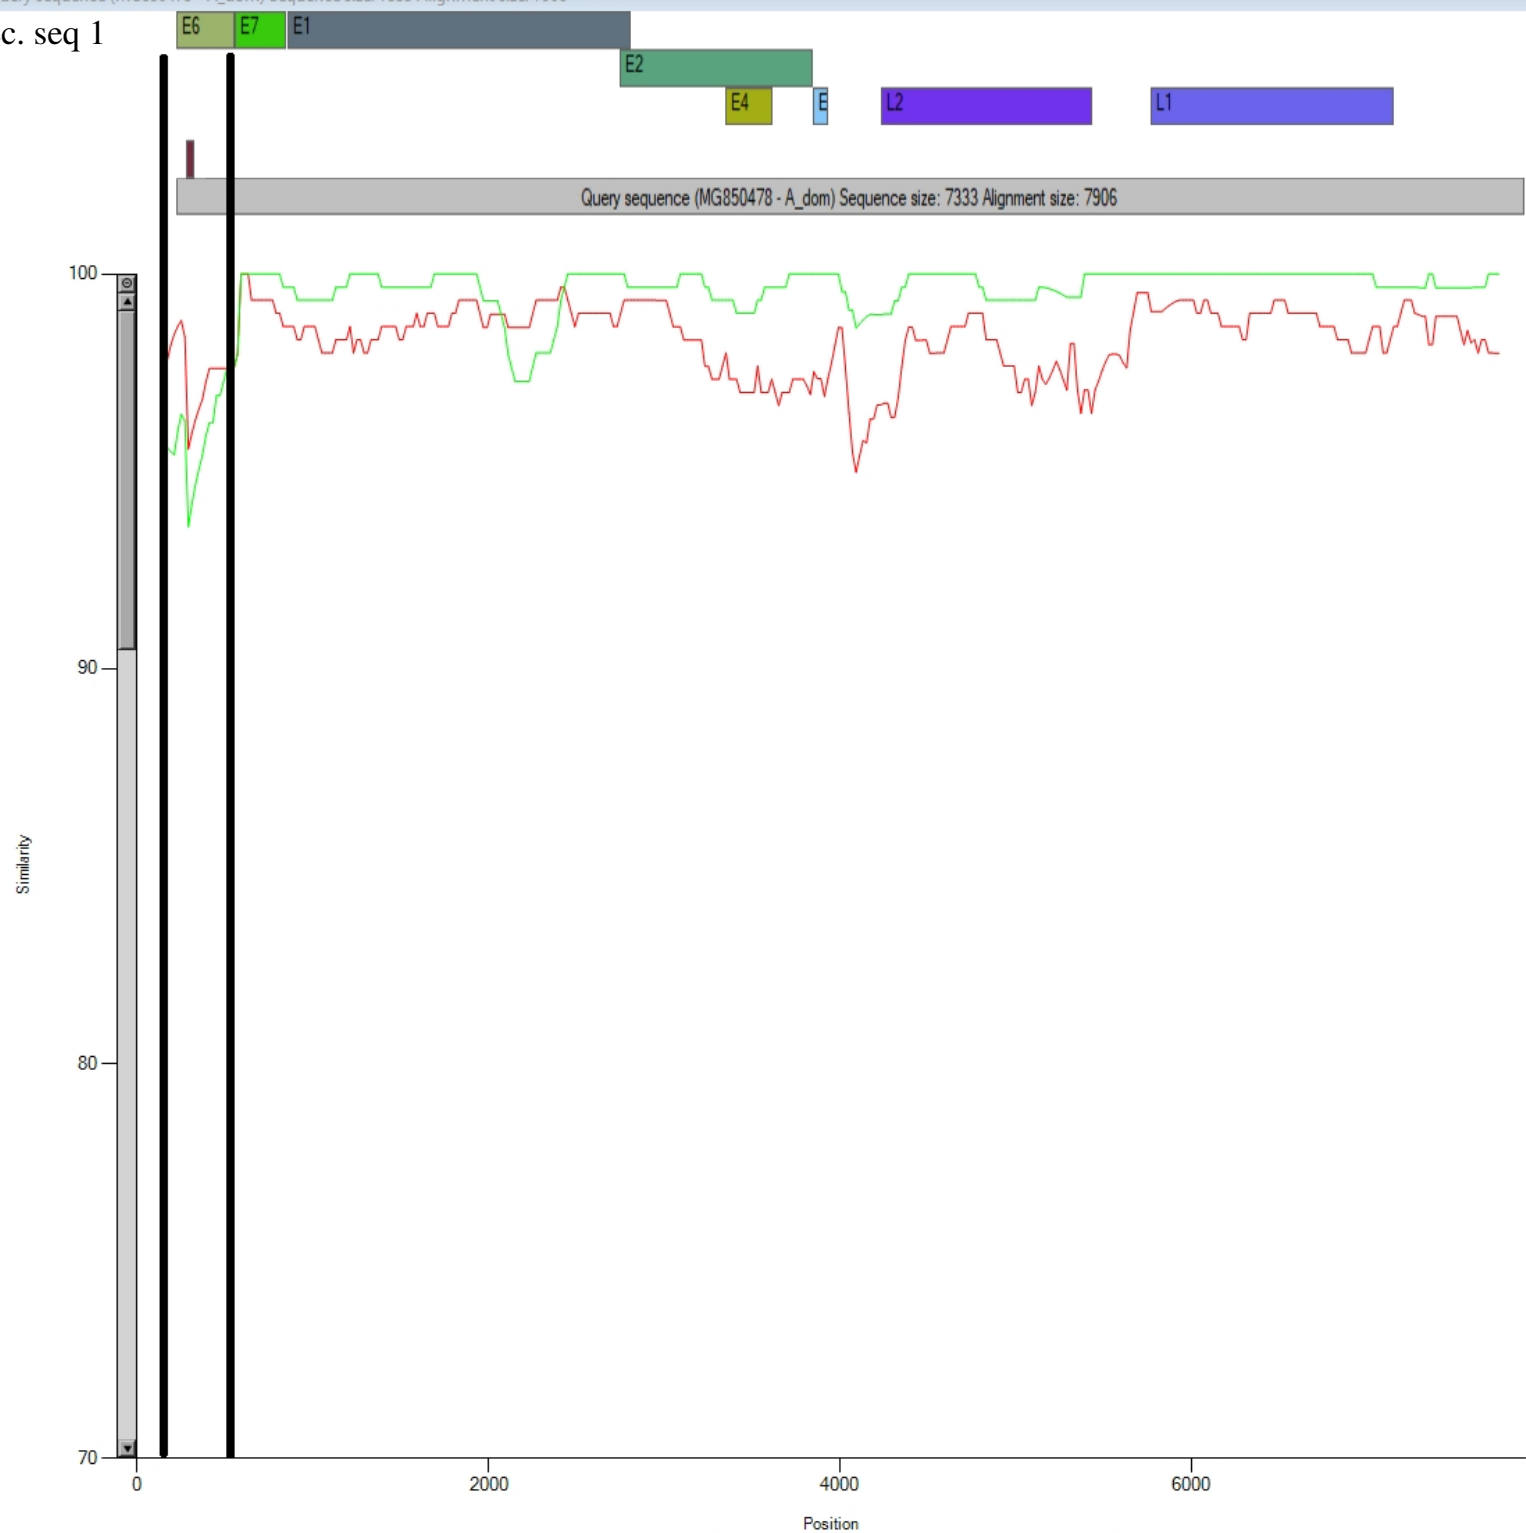

HQ644257 - D  
AF472509 - C  
AF536180 - B  
NC\_001526 - A

Rec. seq 2

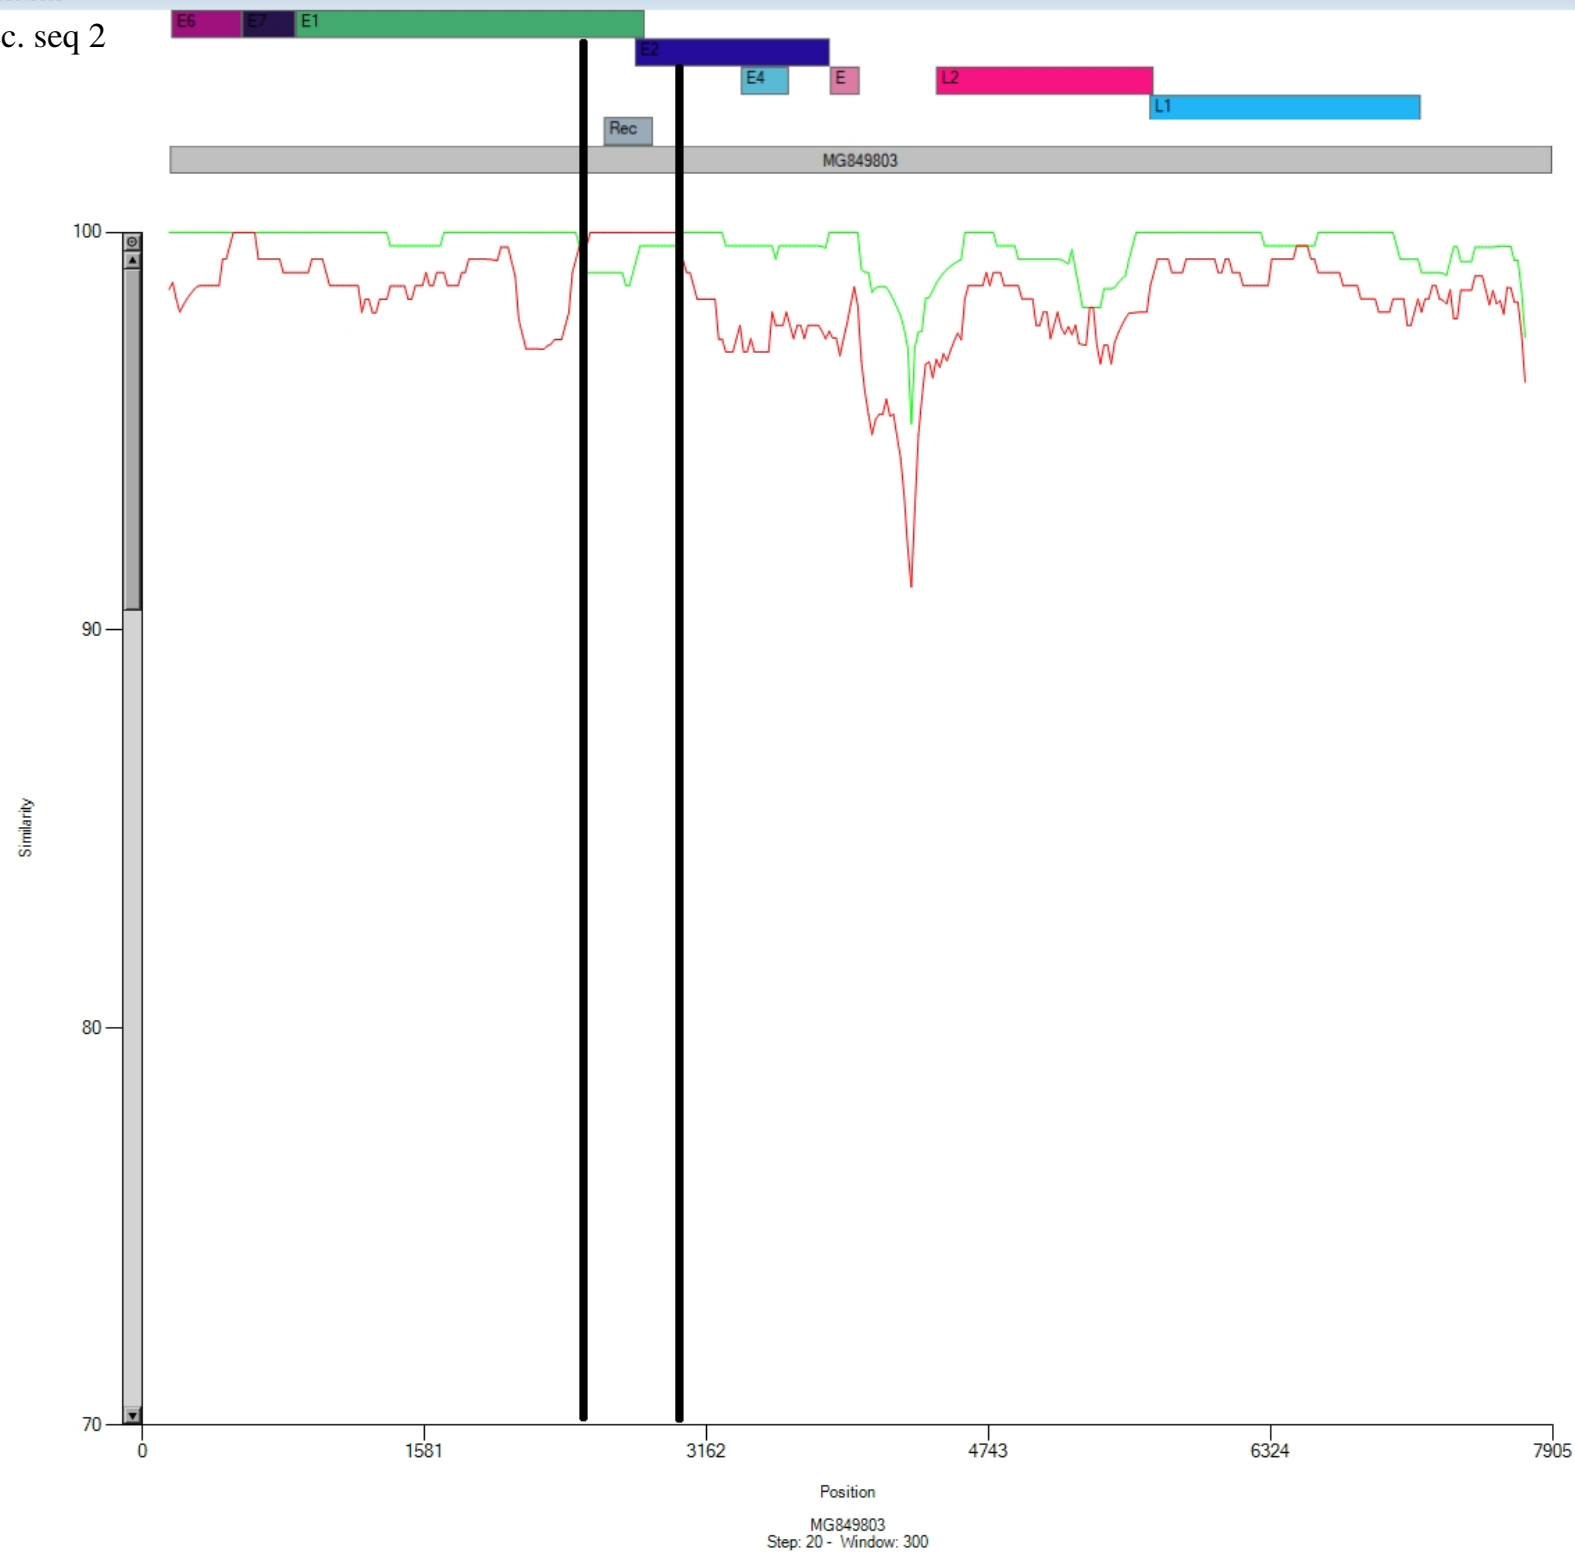

Rec. seq 3

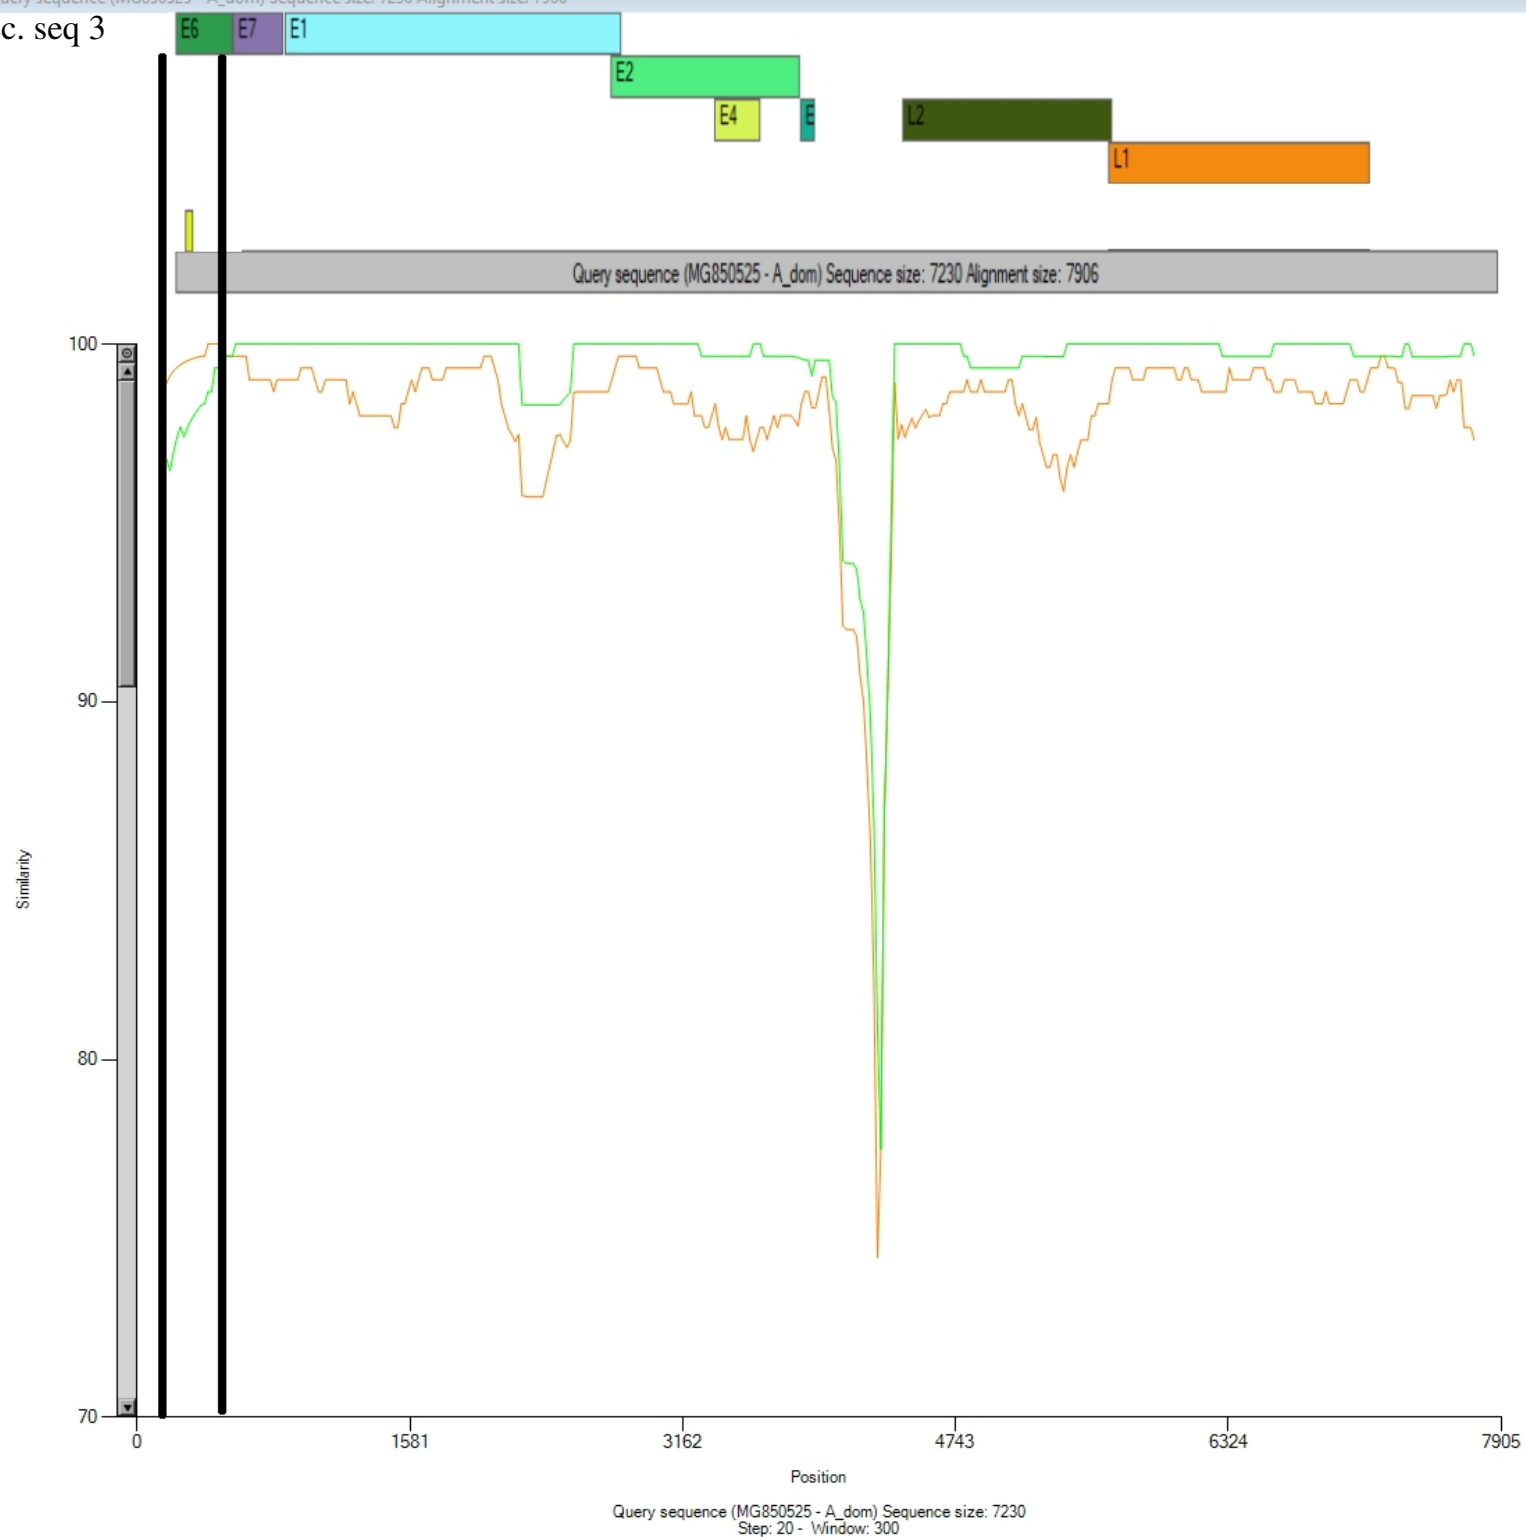

AF472509 - C  
NC\_001526 - A  
AF536180 - B  
HQ644257 - D

Rec. seq 4

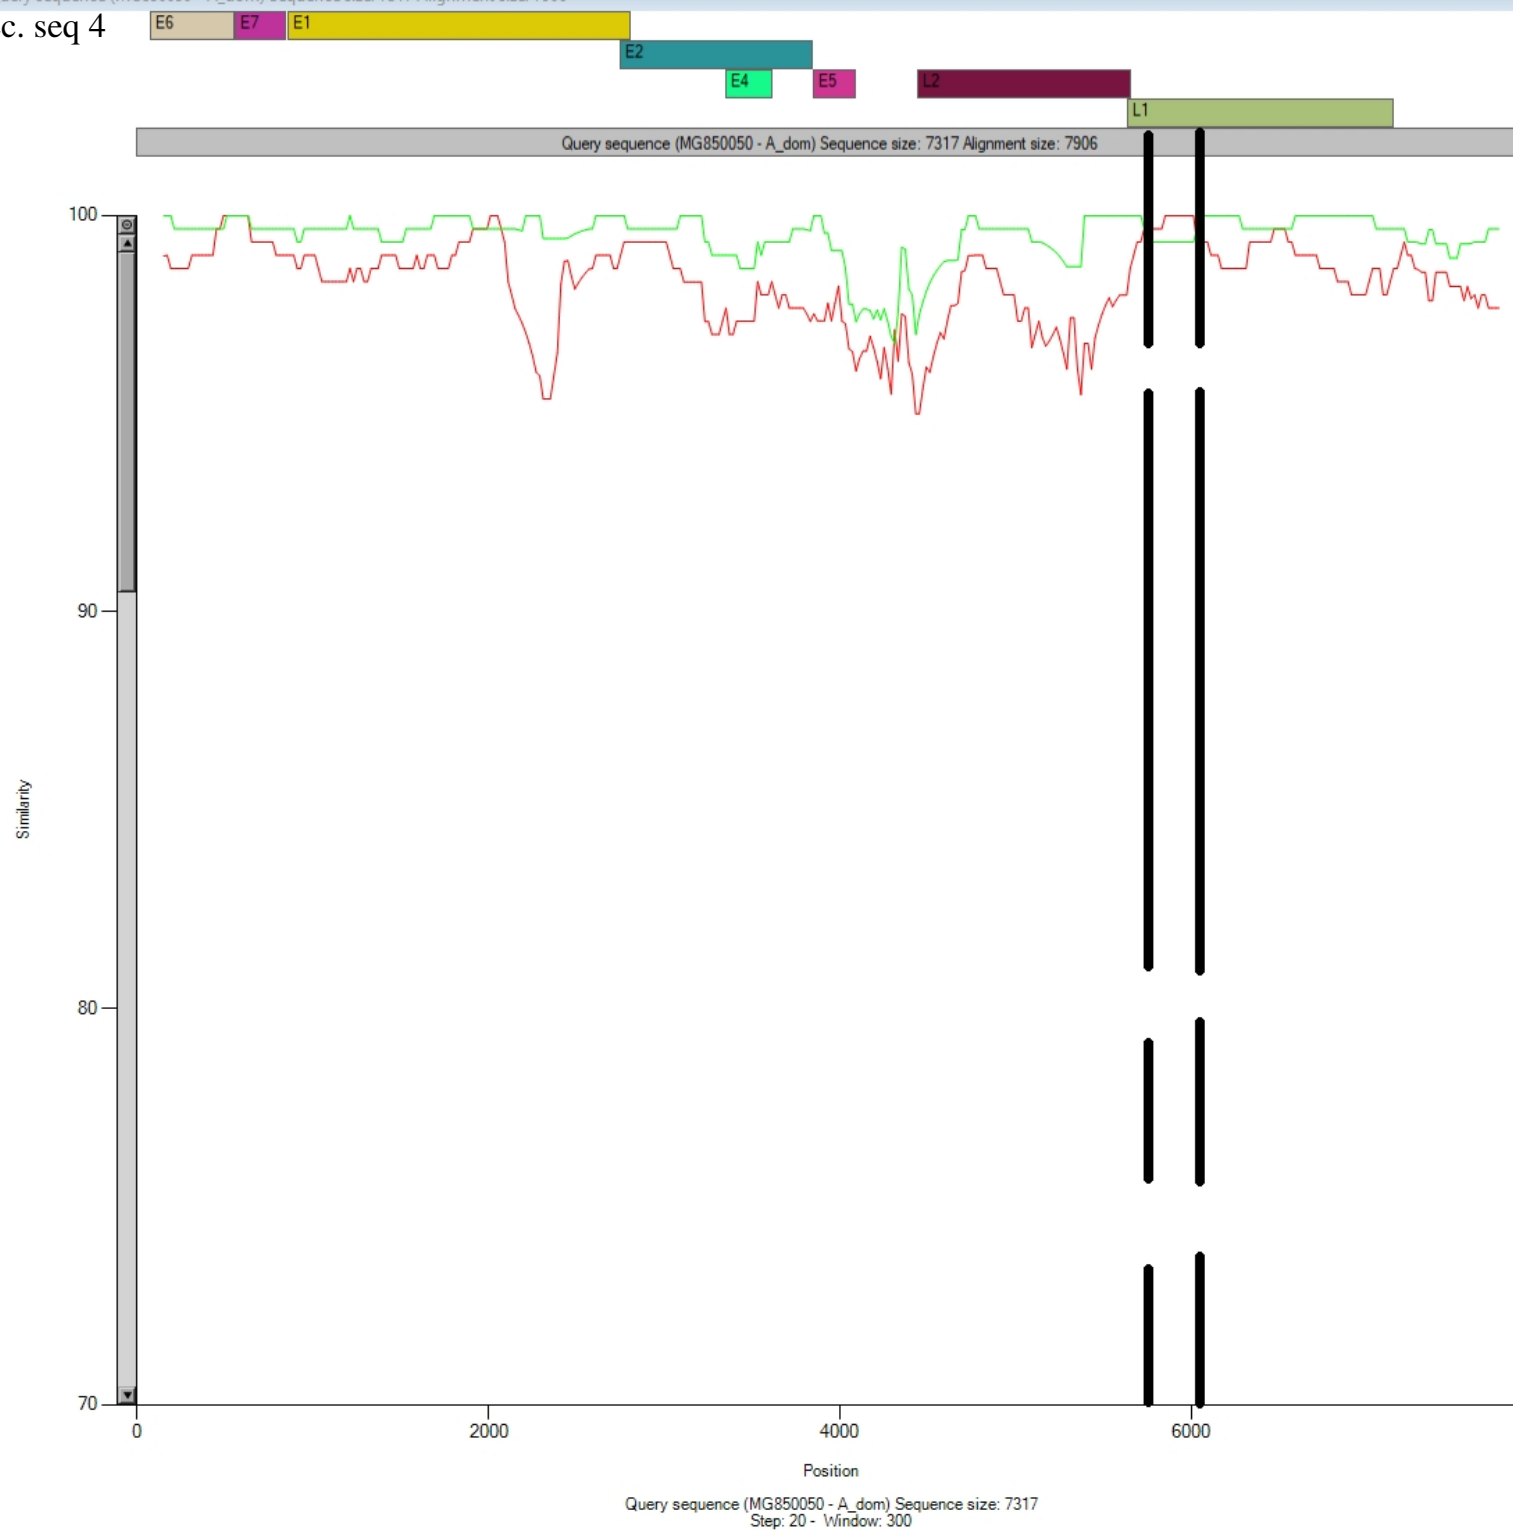

HQ644257 - D  
AF472509 - C  
NC\_001526 - A  
AF536180 - B

Dotted lines represent the lower confidence  
recombination crossover sites  
(recombination events supported by 2 or  
less lineage specific SNPs)



Rec. seq 5

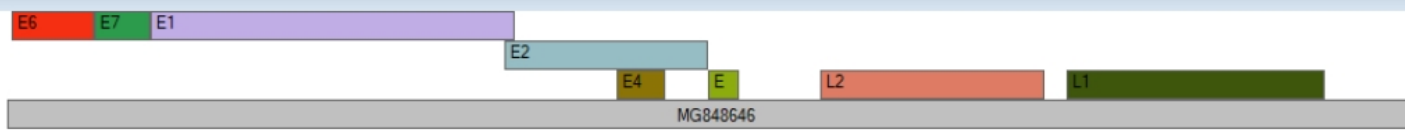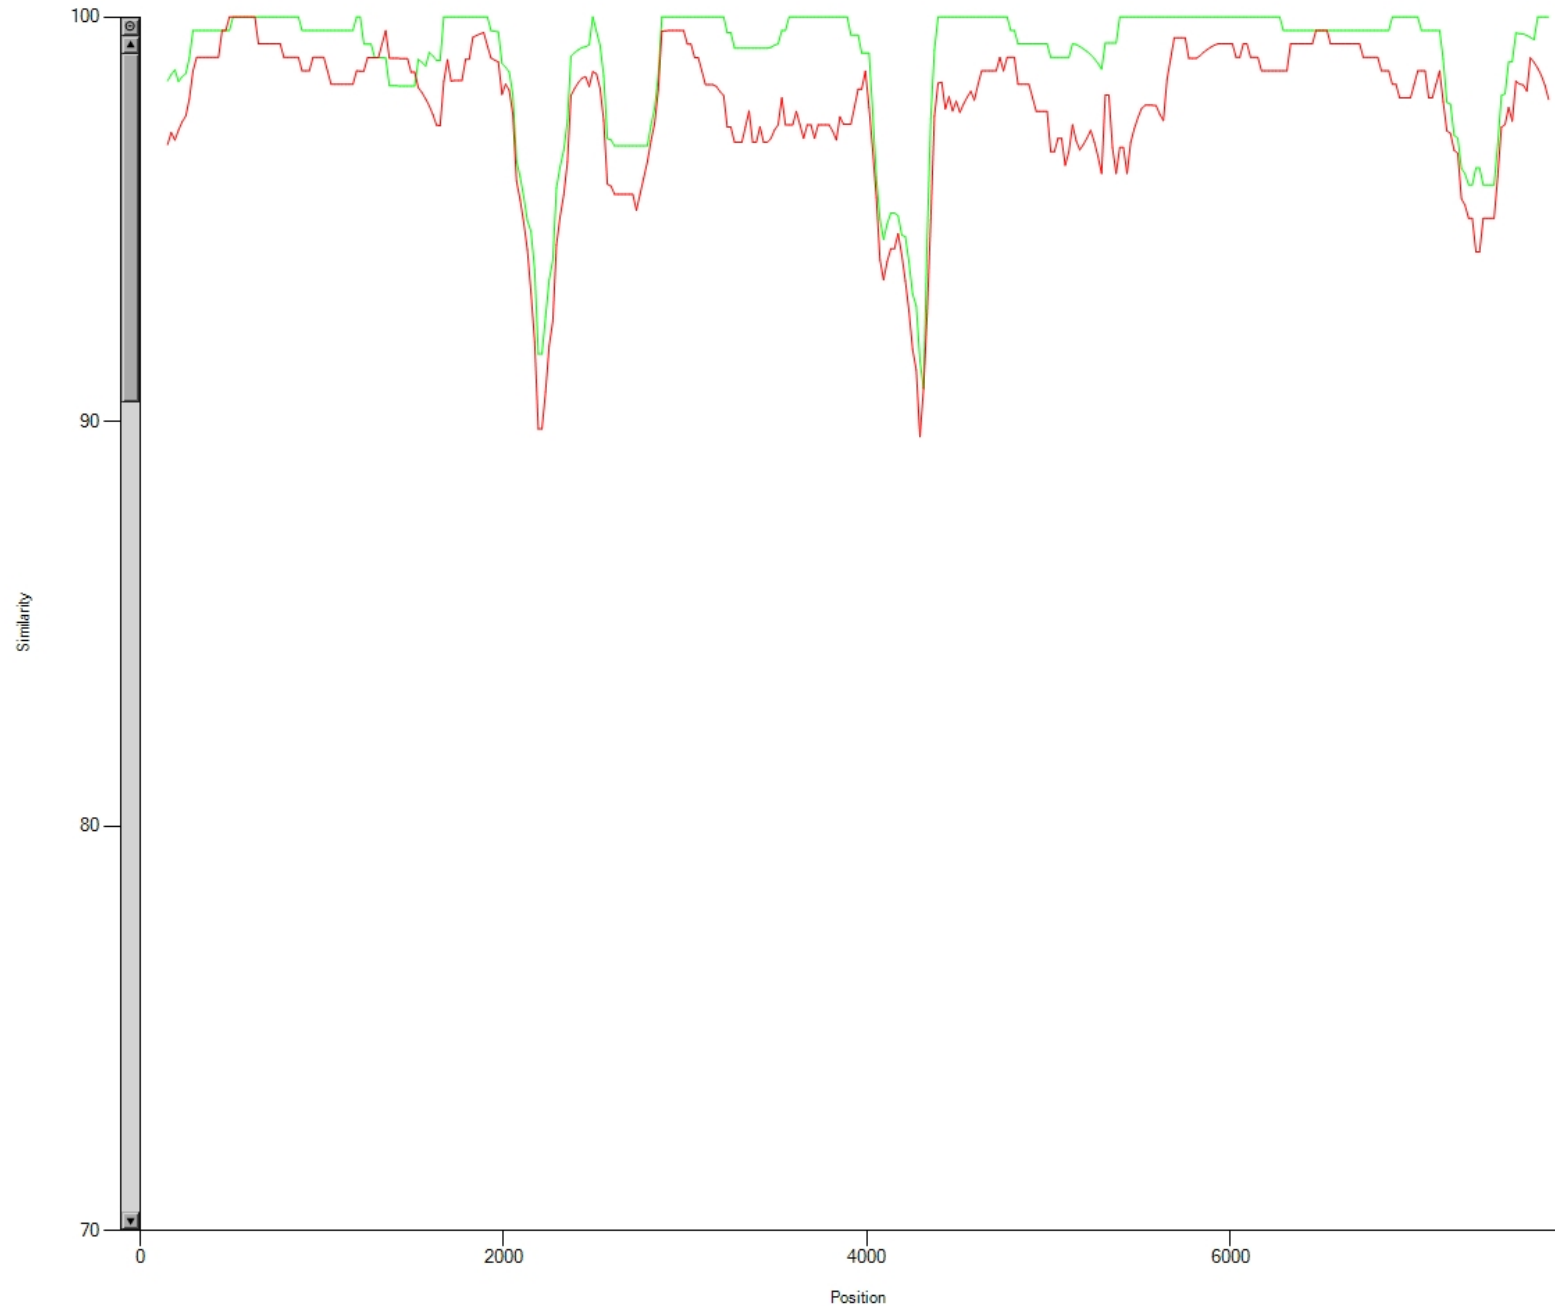

- AF536180
- NC\_001526
- AF472509
- HQ644257

Rec. seq 6

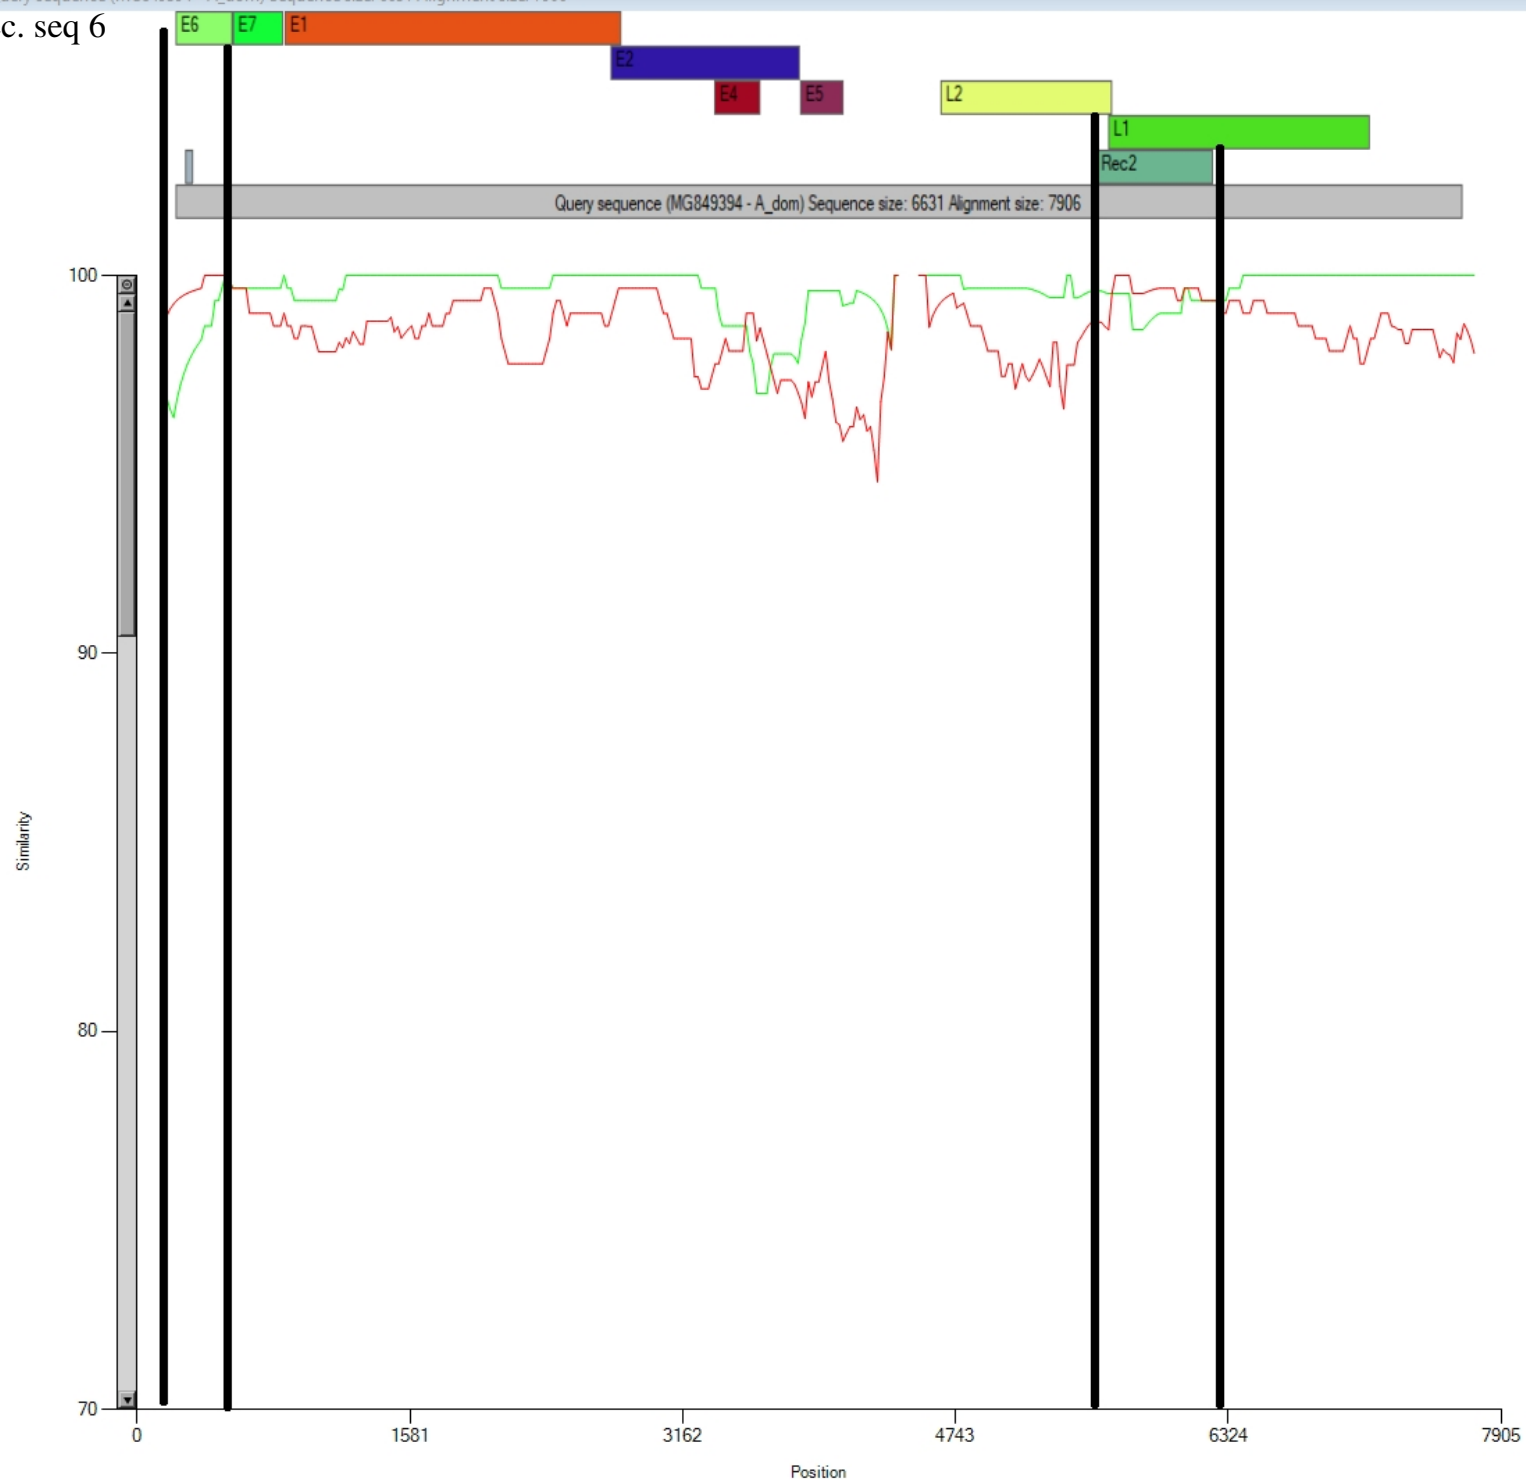

Query sequence (MG849394 - A\_dom) Sequence size: 6631  
Step: 20 - Window: 300

- NC\_001526 - A
- AF536180 - B
- AF472509 - C
- HQ644257 - D

Rec. seq 7

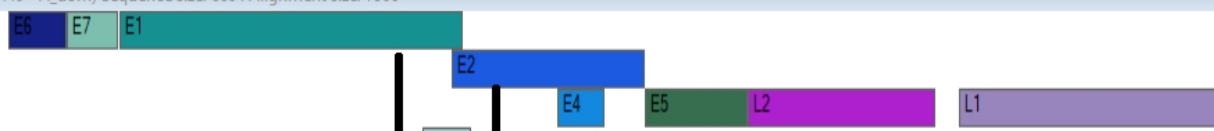

Rec

Query sequence (MG850440 - A\_dom) Sequence size: 6604 Alignment size: 7906

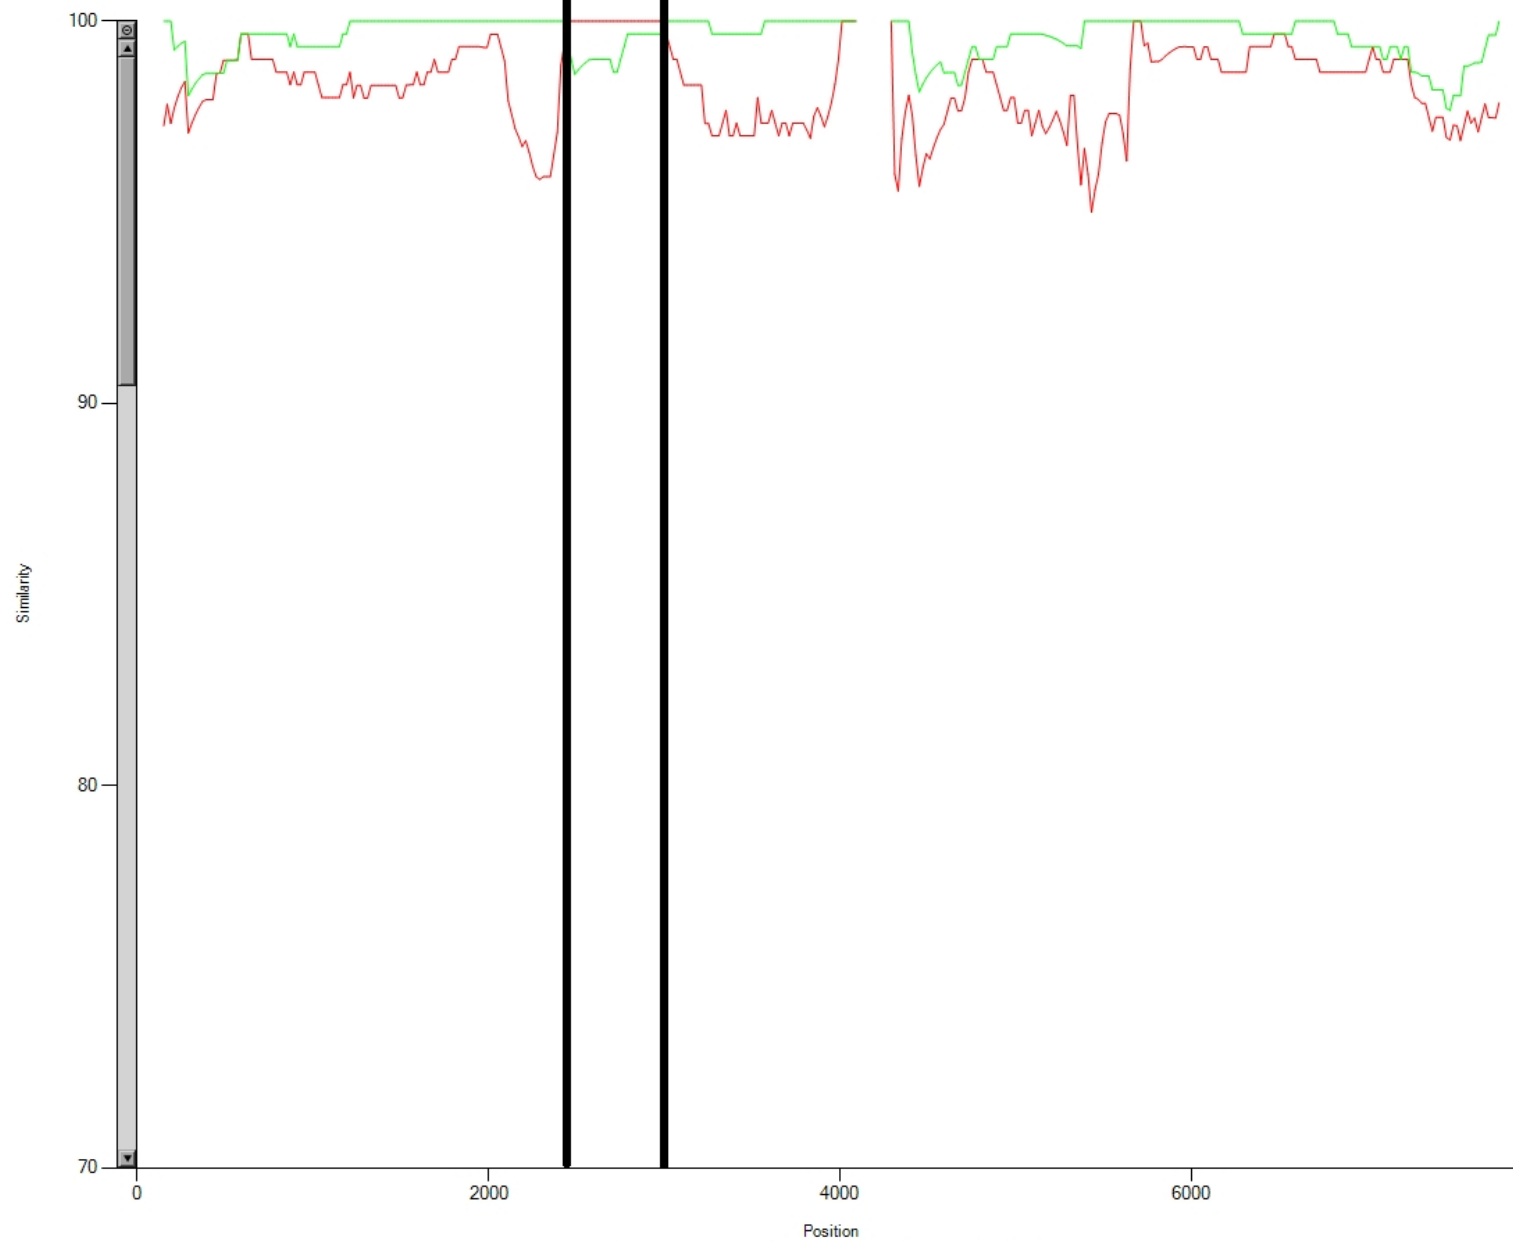

- HQ644257 - D
- NC\_001526 - A
- AF536180 - B
- AF472509 - C

Rec. seq 8

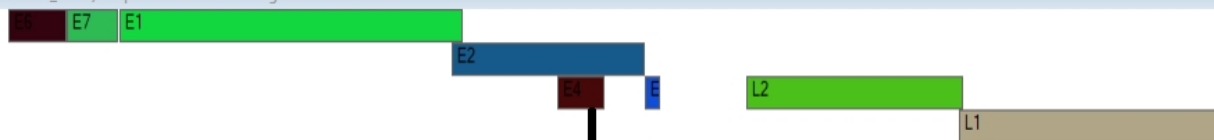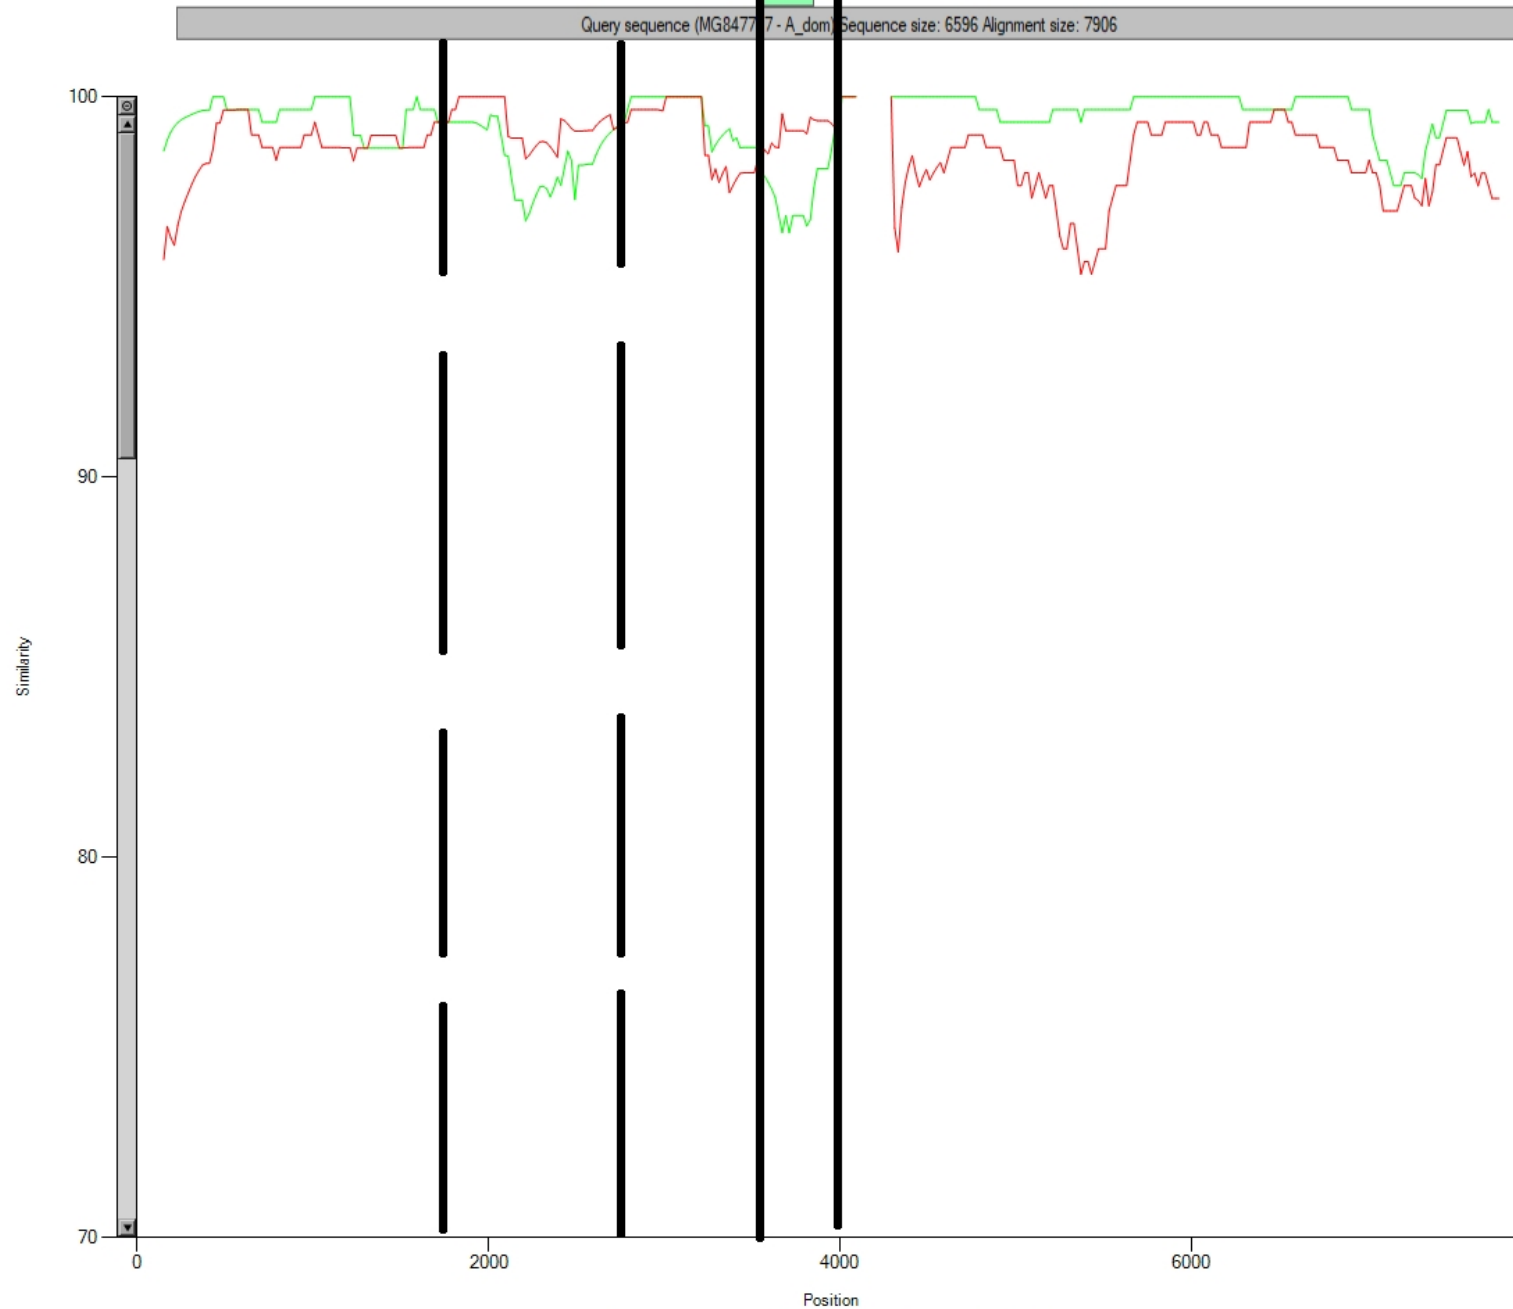

Query sequence (MG847737 - A\_dom) Sequence size: 6596  
Step: 20 - Window: 300

Rec. seq 9

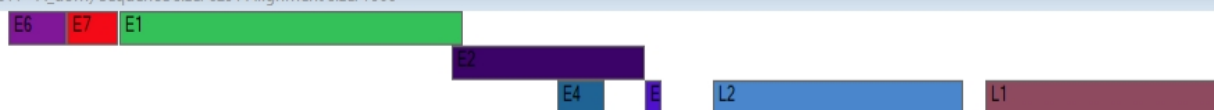

Query sequence (MT316244 - A\_dom) Sequence size: 6291 Alignment size: 7906

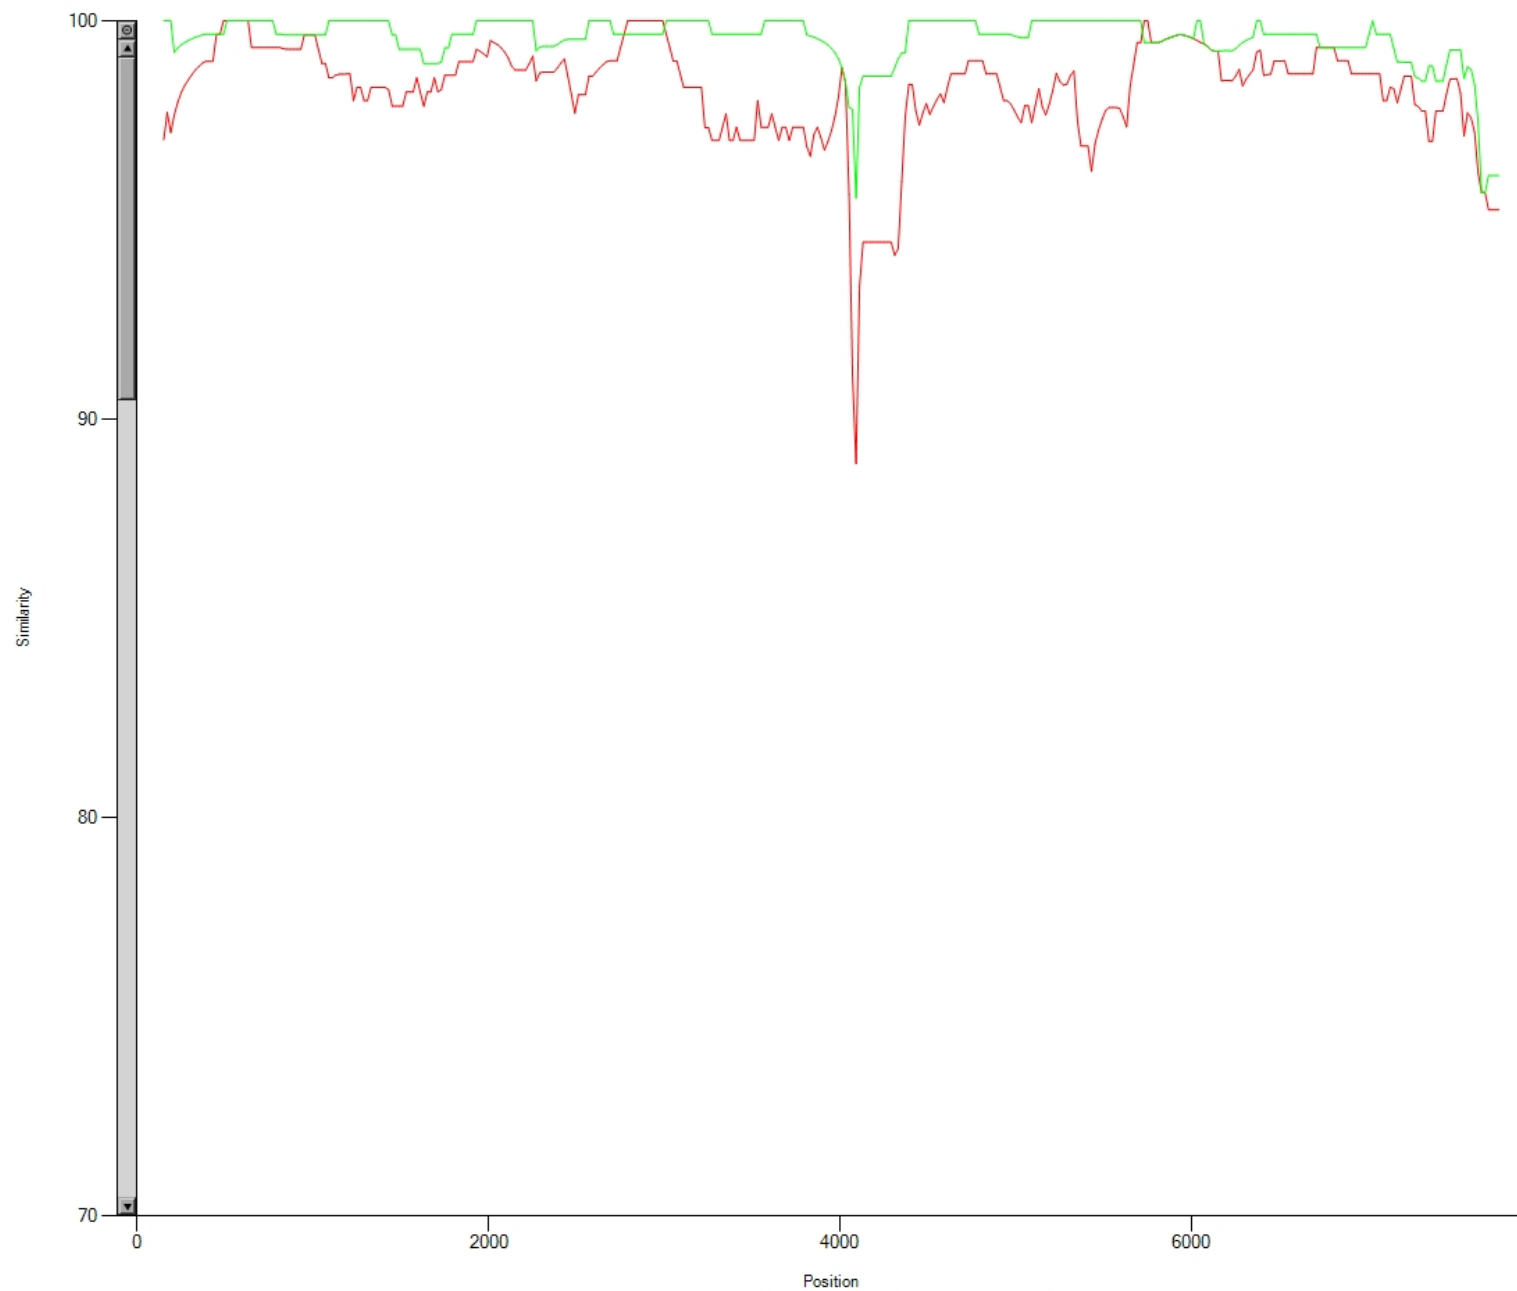

HQ644257 - D  
AF472509 - C  
NC\_001526 - A  
AF536180 - B

Query sequence (MT316244 - A\_dom) Sequence size: 6291  
Step: 20 - Window: 300

Rec. seq 10

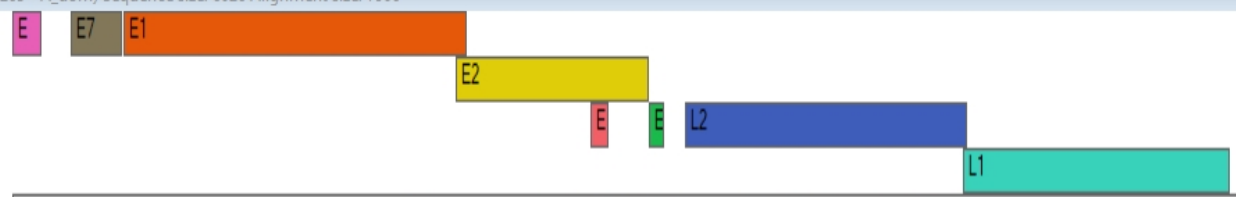

Query sequence (MT316265 - A\_dom) Sequence size: 6026 Alignment size: 7906

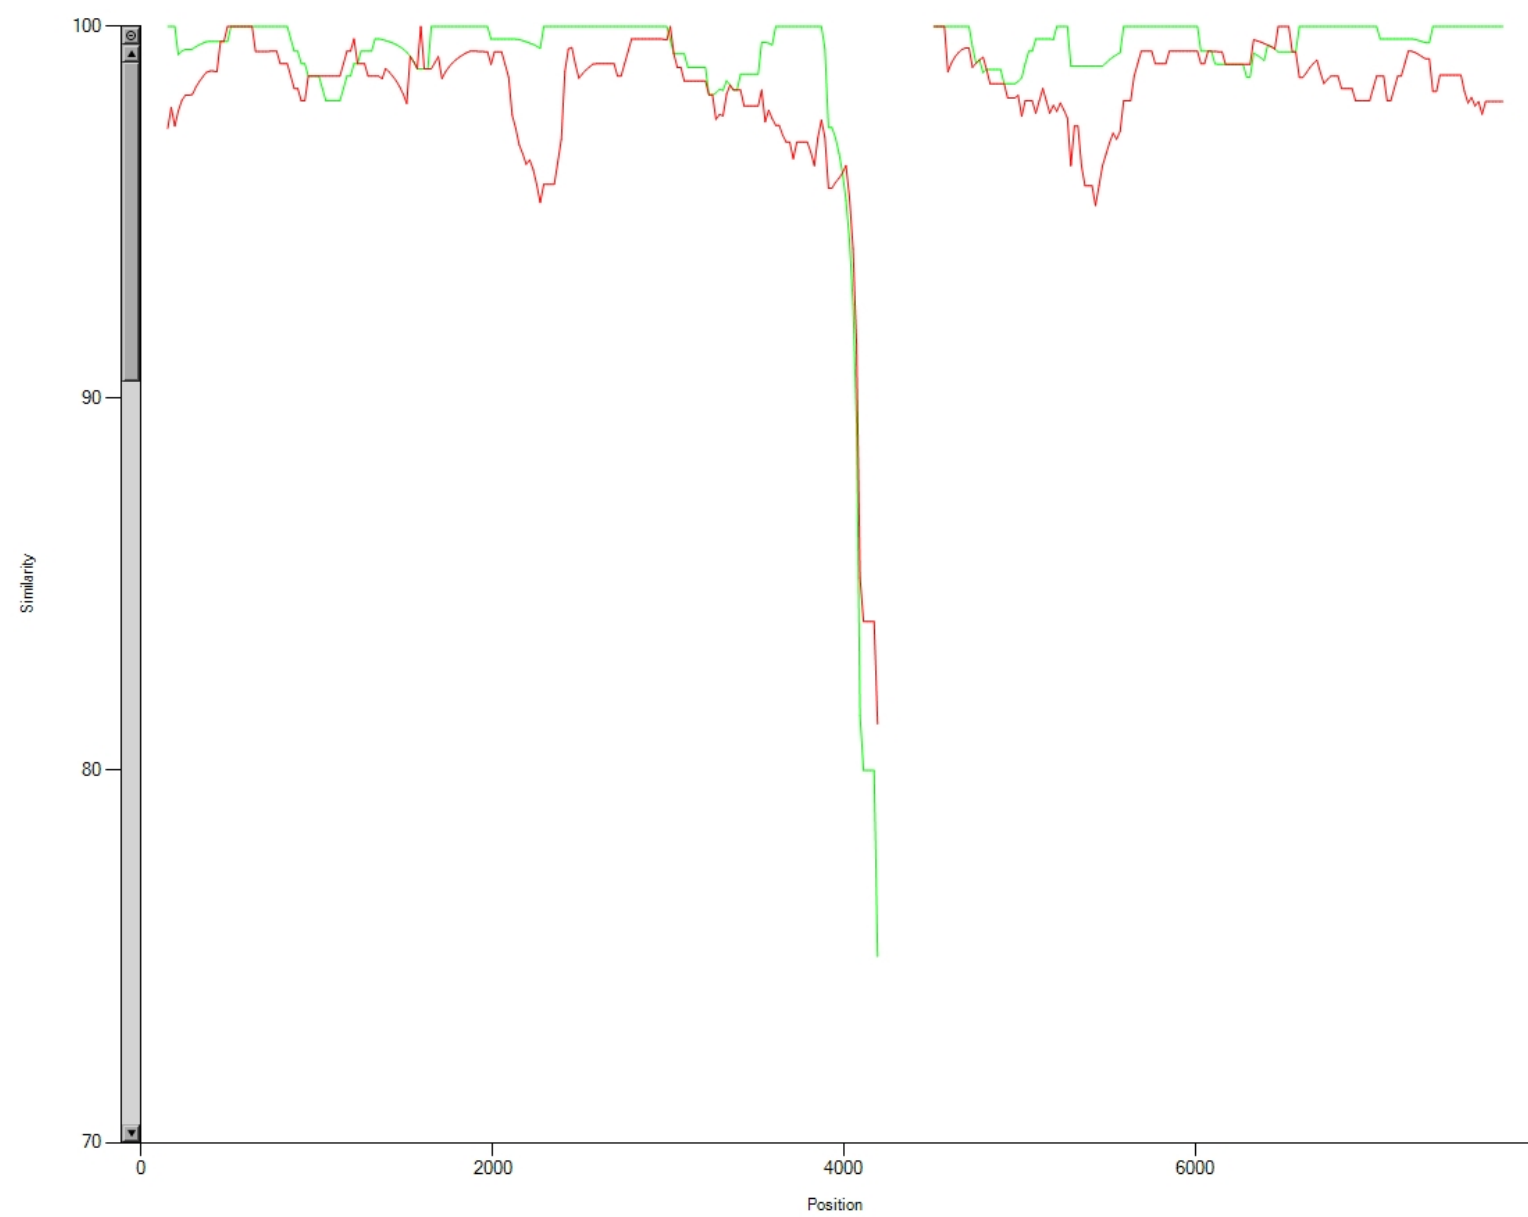

AF472509 - C  
NC\_001526 - A  
AF536180 - B  
HQ644257 - D

Rec. seq 11

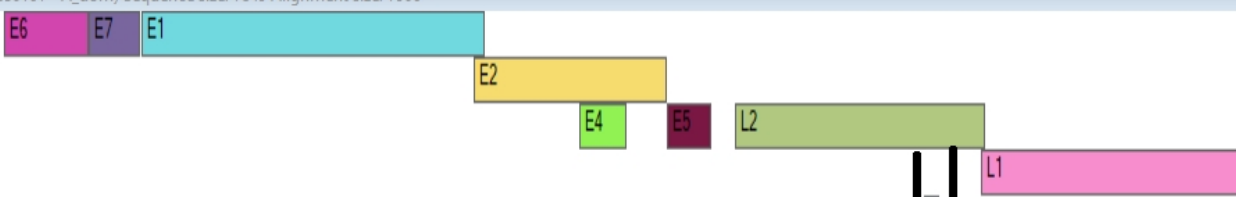

Query sequence (MG850161 - A\_dom) Sequence size: 7849 Alignment size: 7906

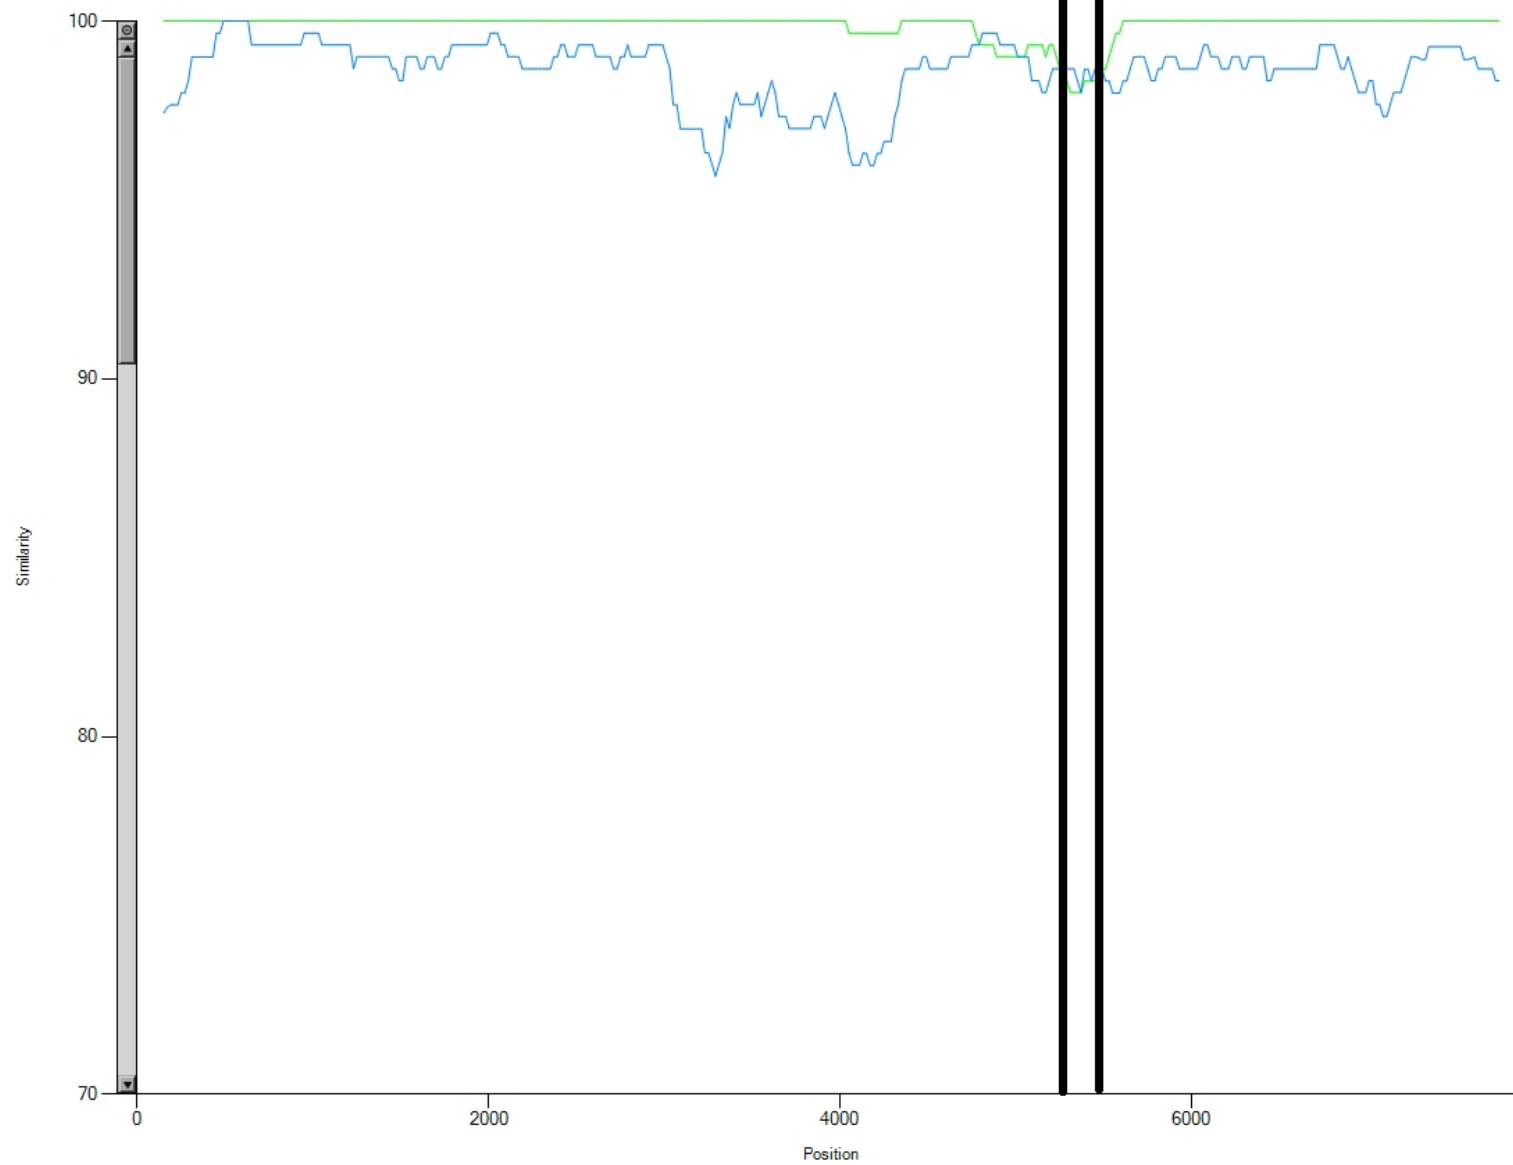

- NC\_001526 - A
- AF536180 - B
- AF472509 - C
- HQ644257 - D

Rec. seq 12

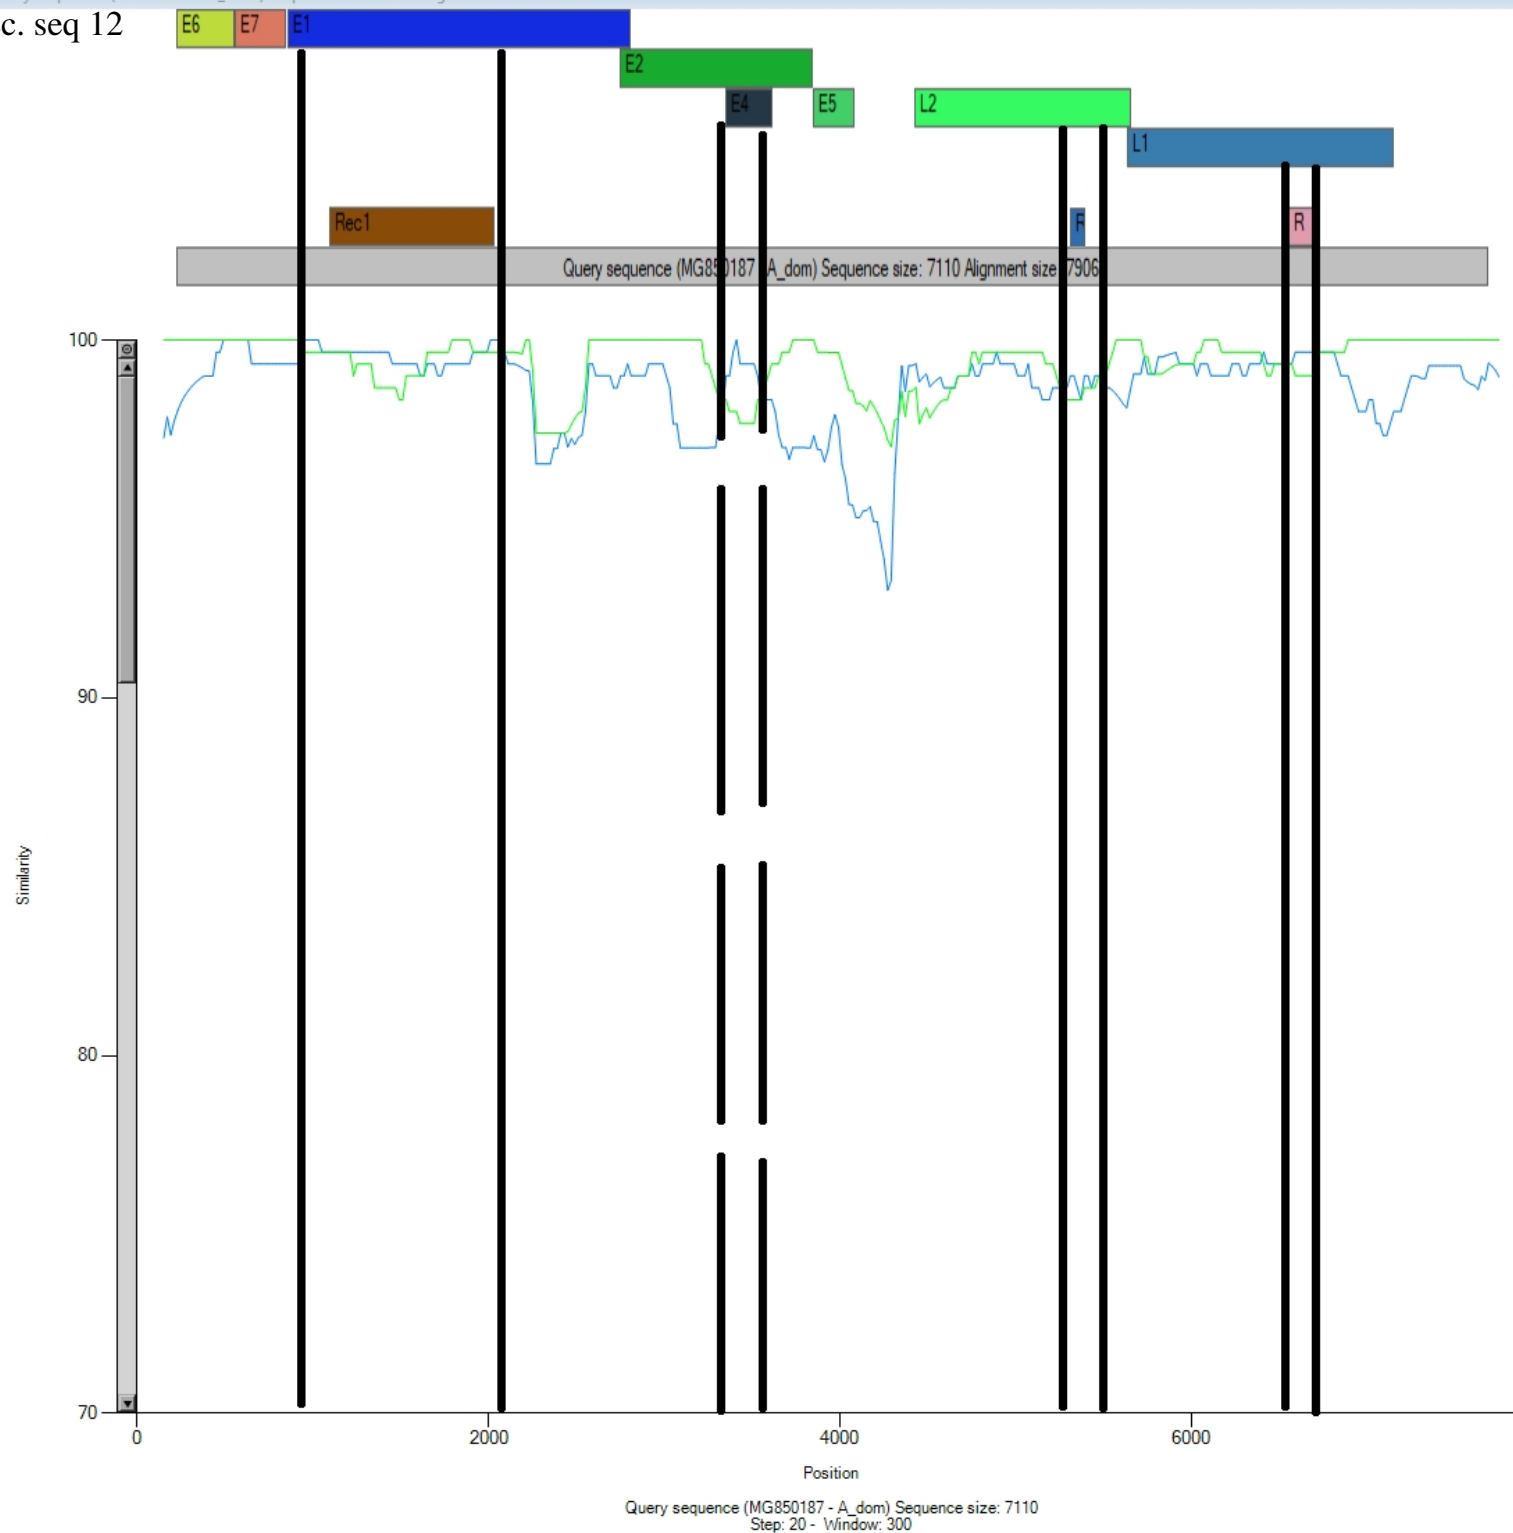

- AF536180 - B
- NC\_001526 - A
- AF472509 - C
- HQ644257 - D

Dotted lines represent the lower confidence recombination crossover sites (recombination events supported by 2 or less lineage specific SNPs)



Rec. seq 13

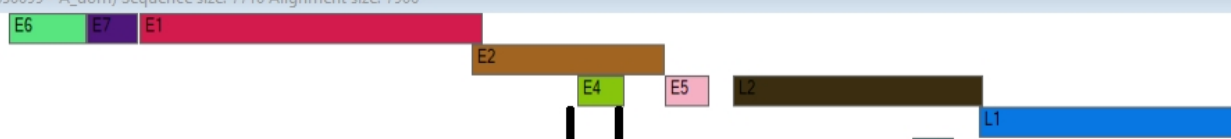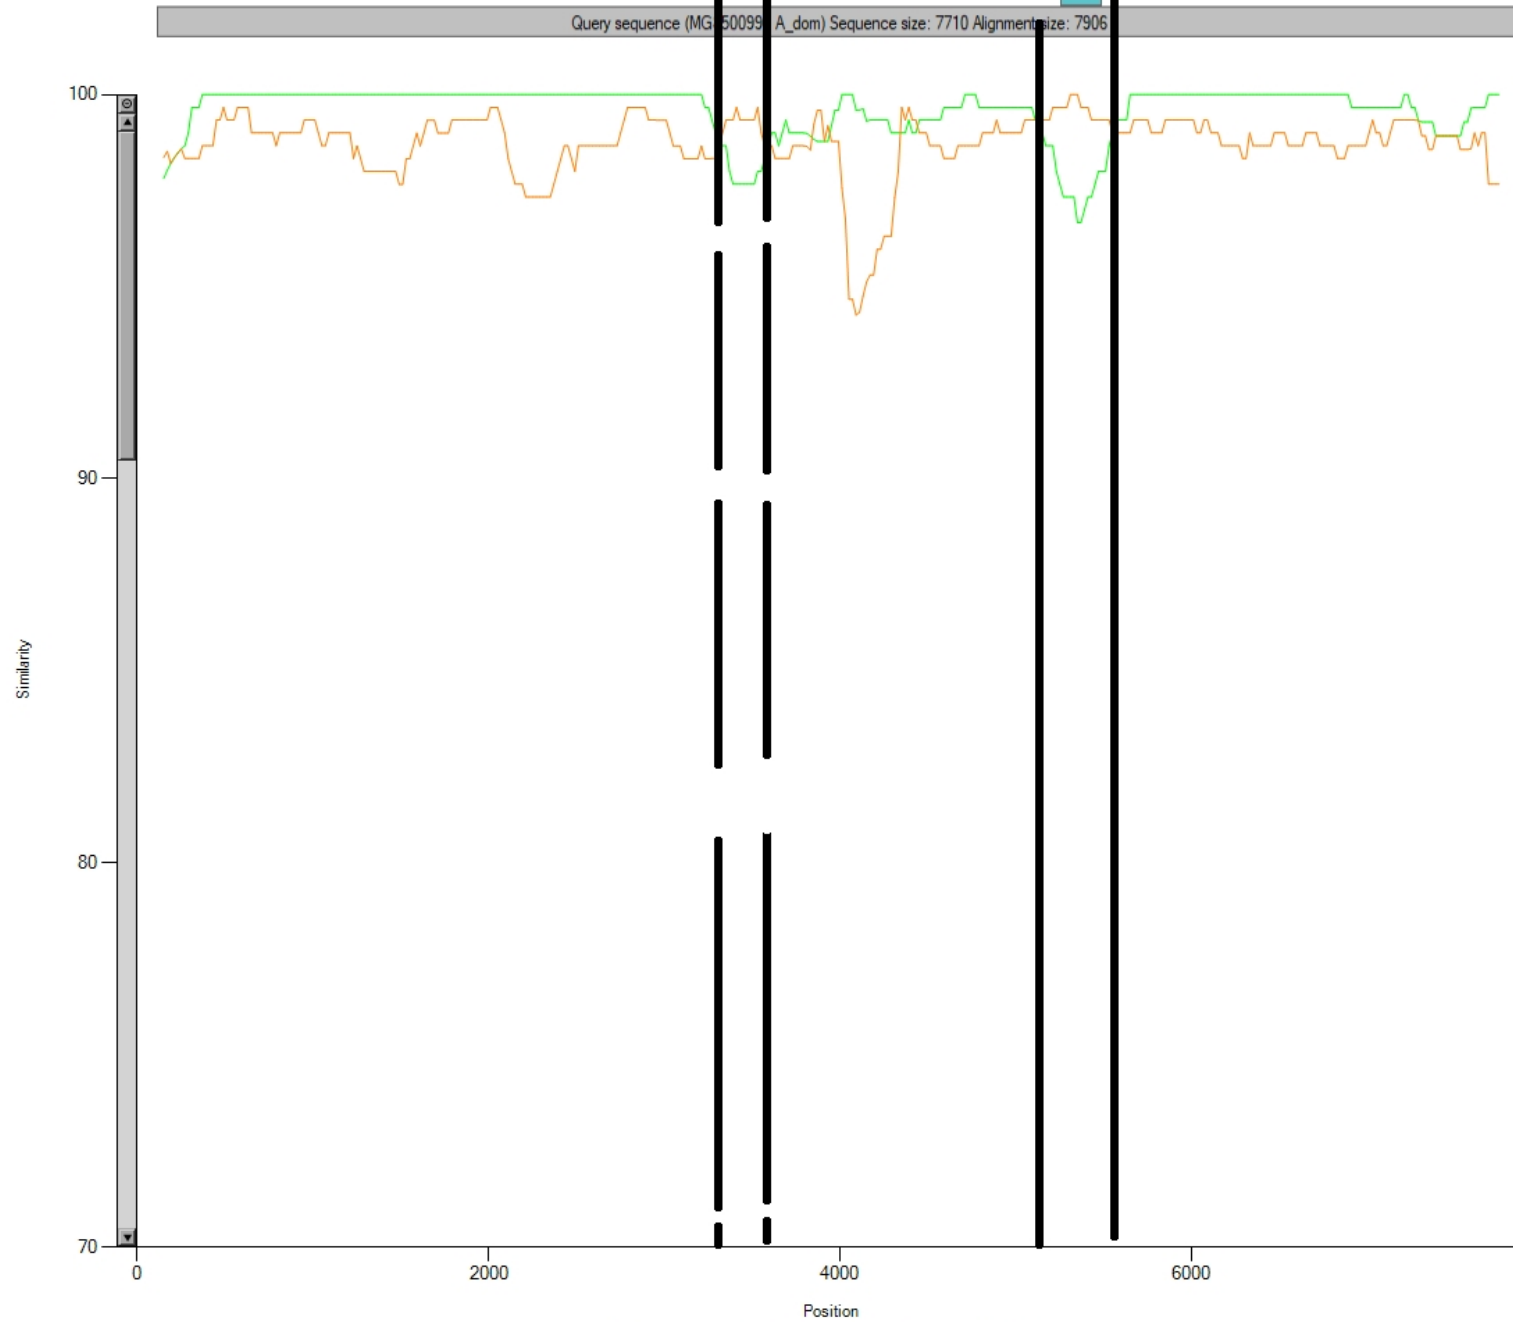

Query sequence (MG850099 - A\_dom) Sequence size: 7710  
Step: 20 - Window: 300

- NC\_001526 - A
- HQ644257 - D
- AF472509 - C
- AF536180 - B

Dotted lines represent the lower confidence recombination crossover sites (recombination events supported by 2 or less lineage specific SNPs)

Rec. seq 14

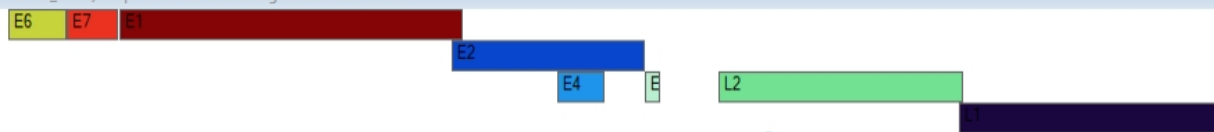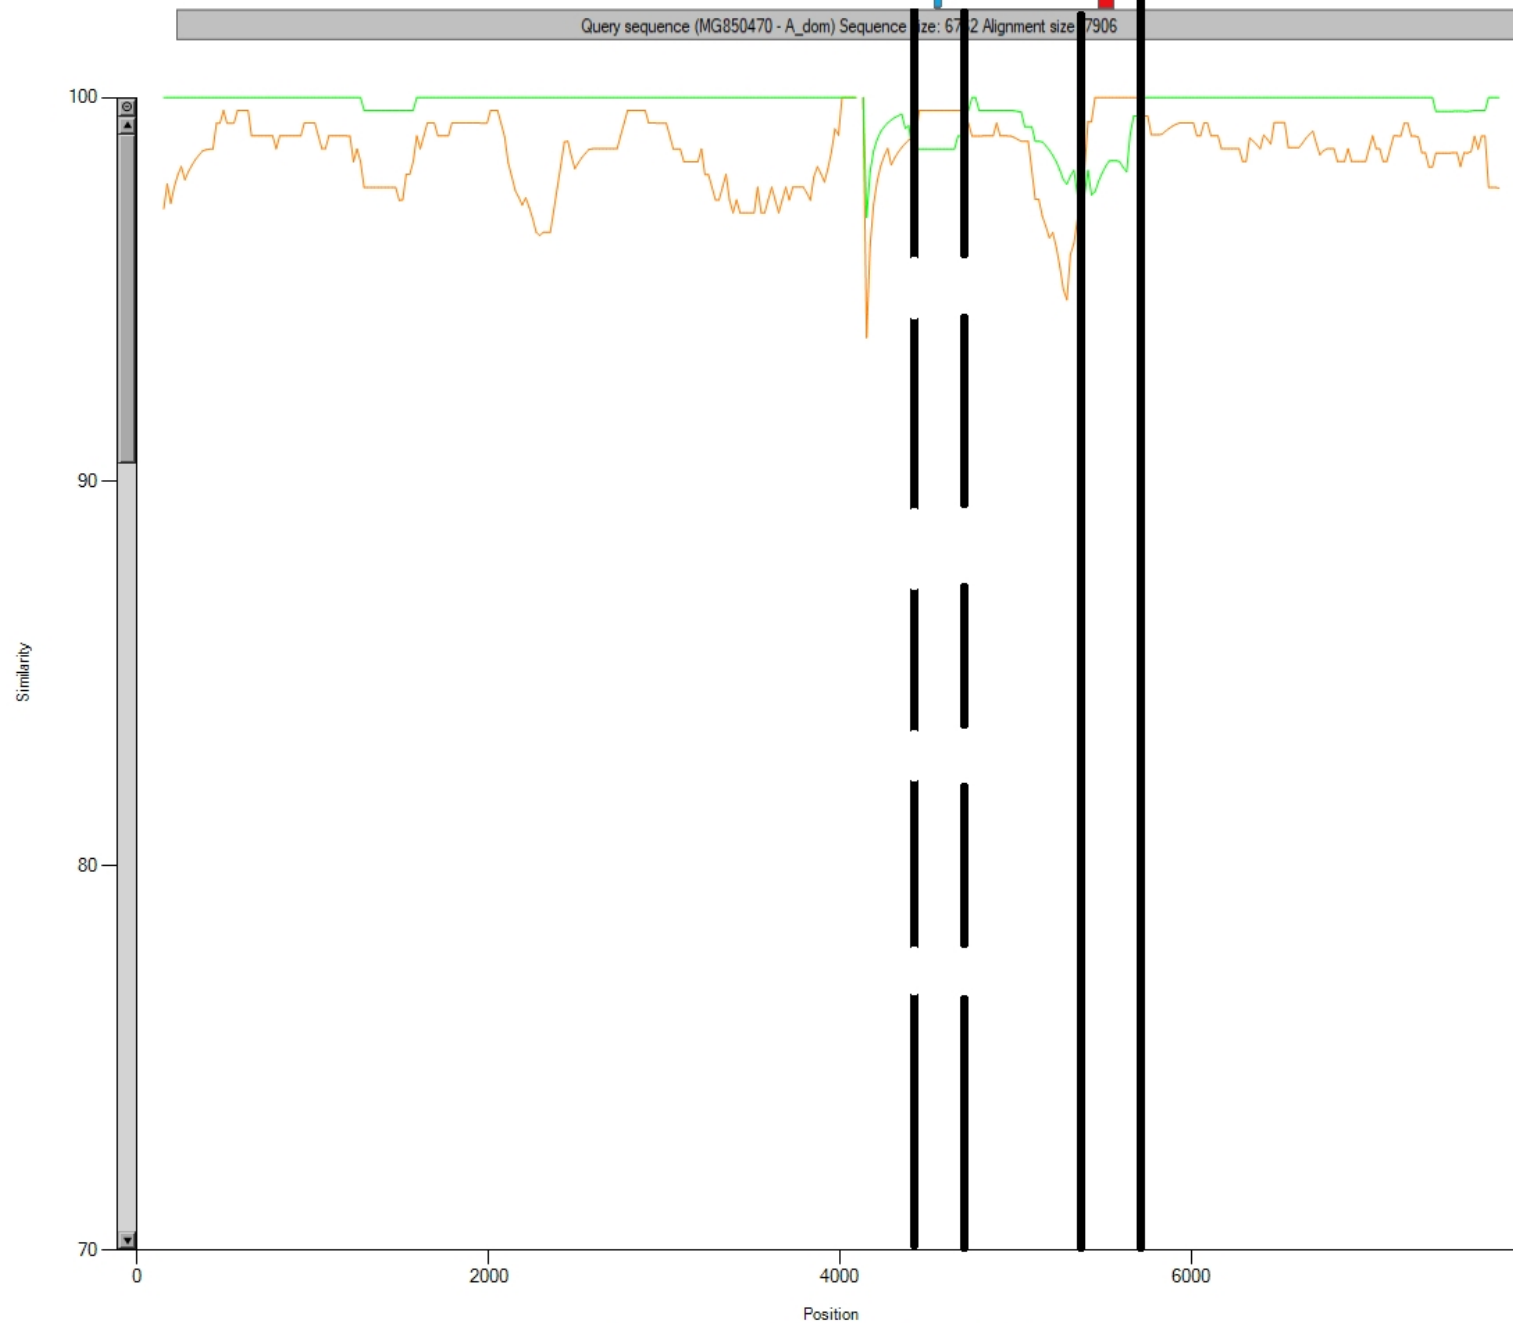

- AF472509 - C
- NC\_001526 - A
- AF536180 - B
- HQ644257 - D

Dotted lines represent the lower confidence recombination crossover sites (recombination events supported by 2 or less lineage specific SNPs)

Rec. seq 15

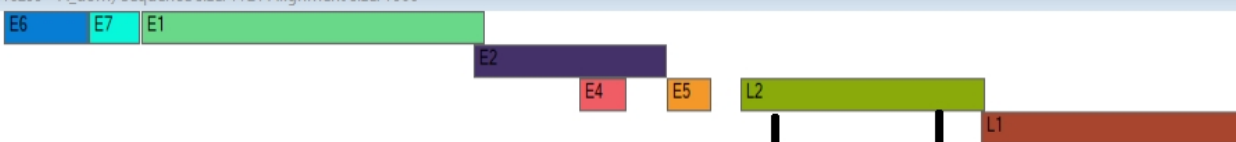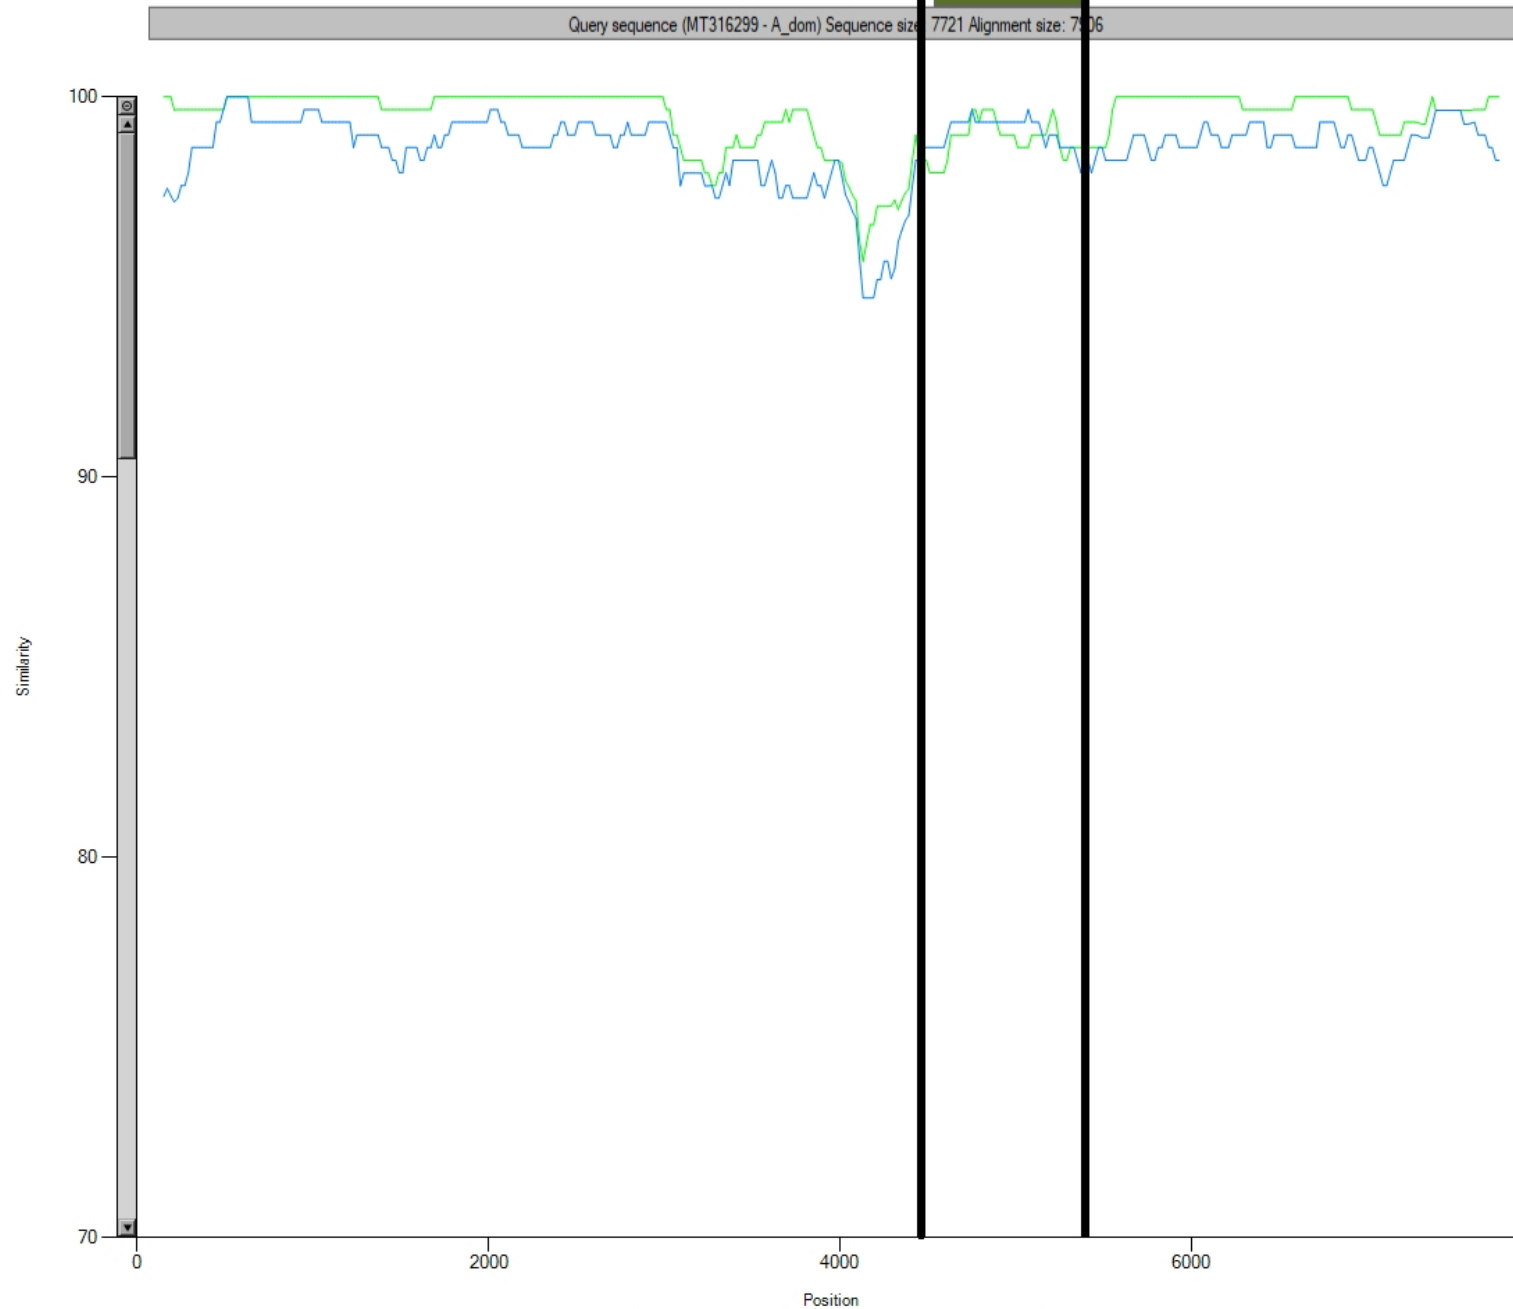

Query sequence (MT316299 - A\_dom) Sequence size: 7721  
Step: 20 - Window: 300

HQ644257 - D  
NC\_001526 - A  
AF536180 - B  
AF472509 - C

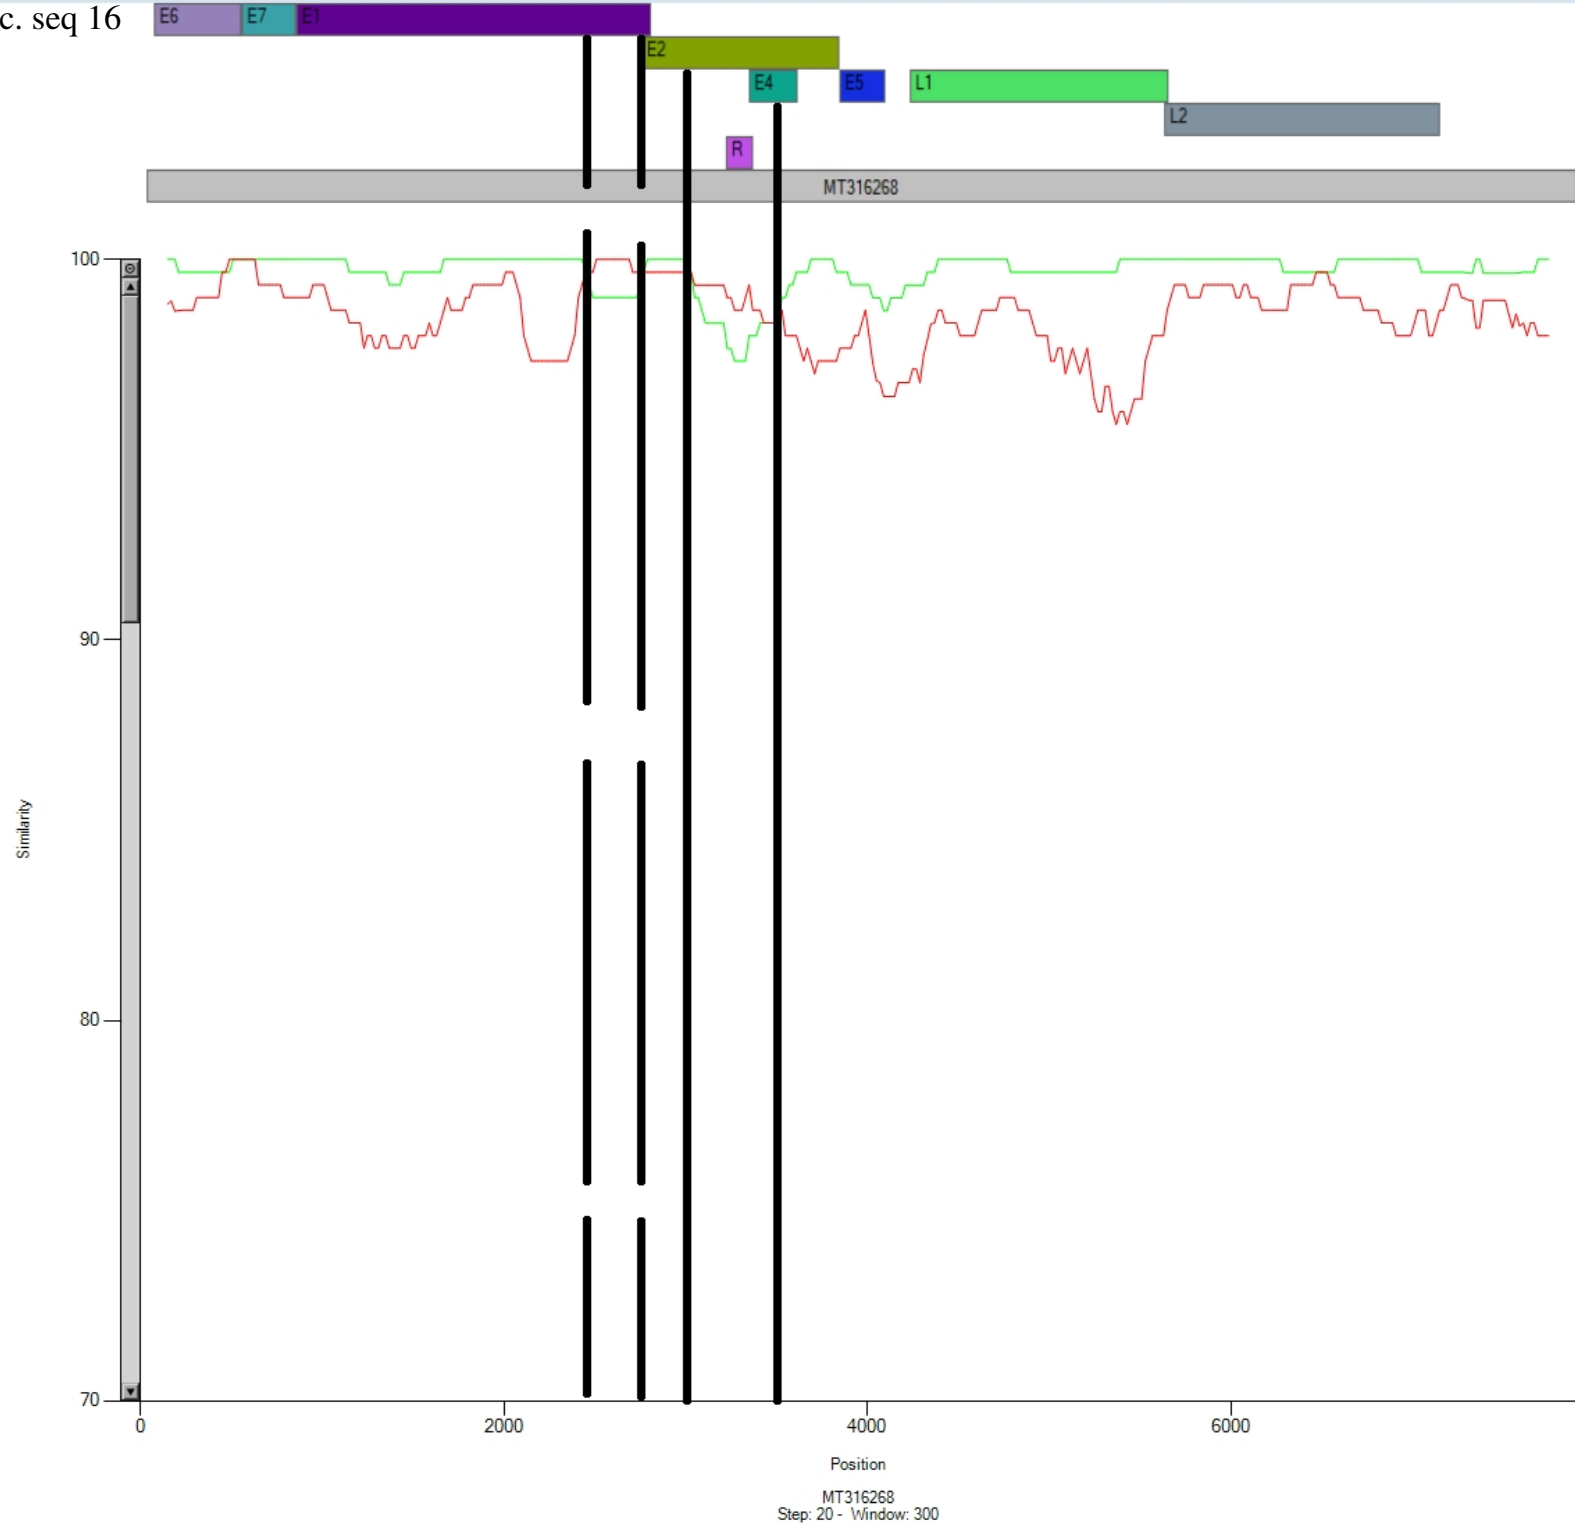

AF536180  
NC\_001526  
AF472509  
HQ644257

Dotted lines represent the lower confidence recombination crossover sites (recombination events supported by 2 or less lineage specific SNPs)

Rec. seq 17

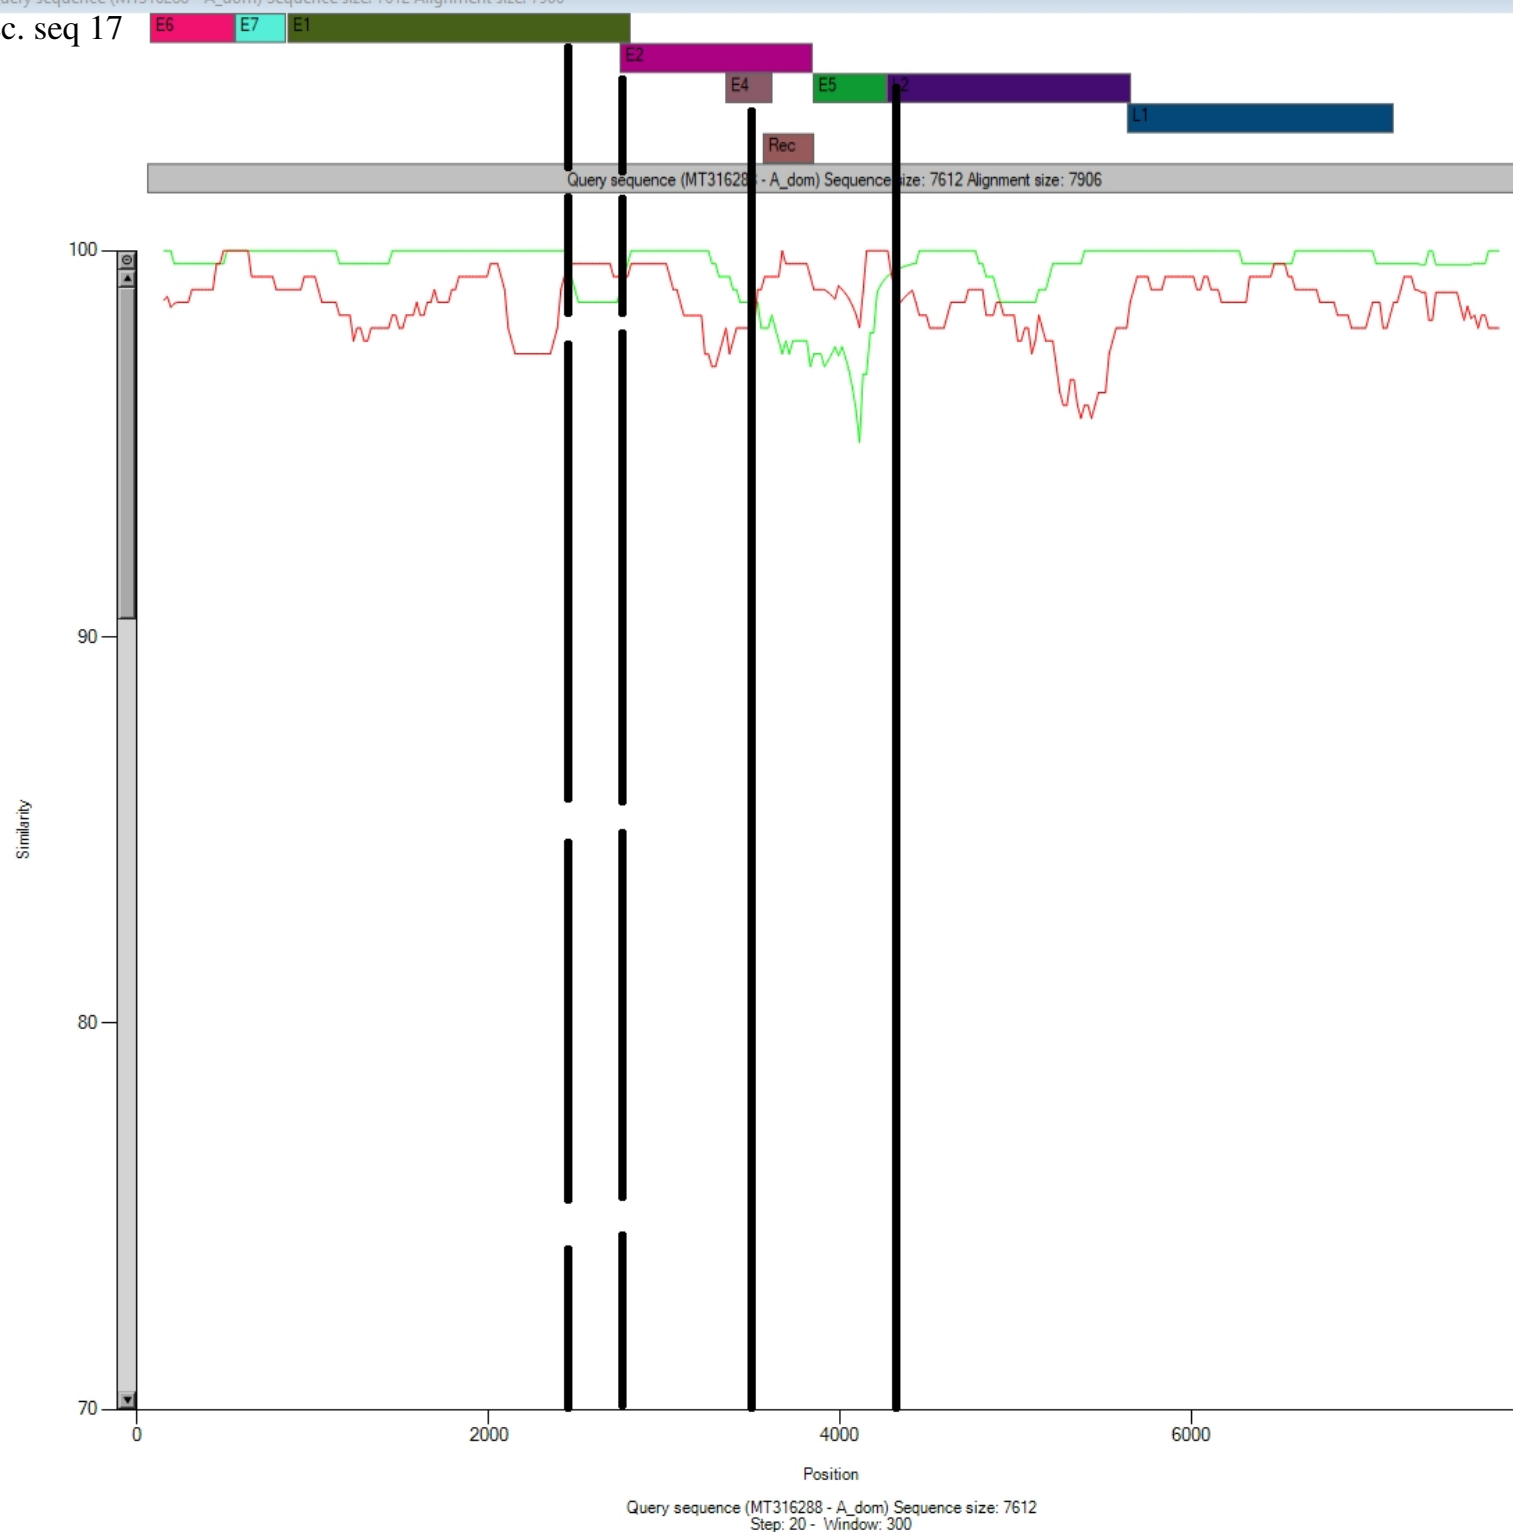

AF472509 - C  
NC\_001526 - A  
AF536180 - B  
HQ644257 - D

Dotted lines represent the lower confidence  
recombination crossover sites  
(recombination events supported by 2 or  
less lineage specific SNPs)

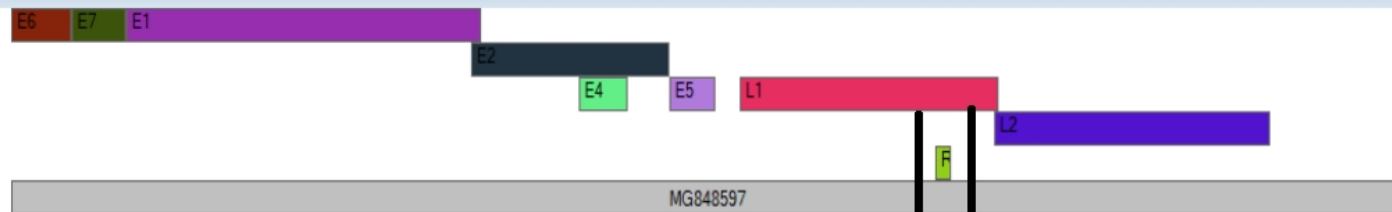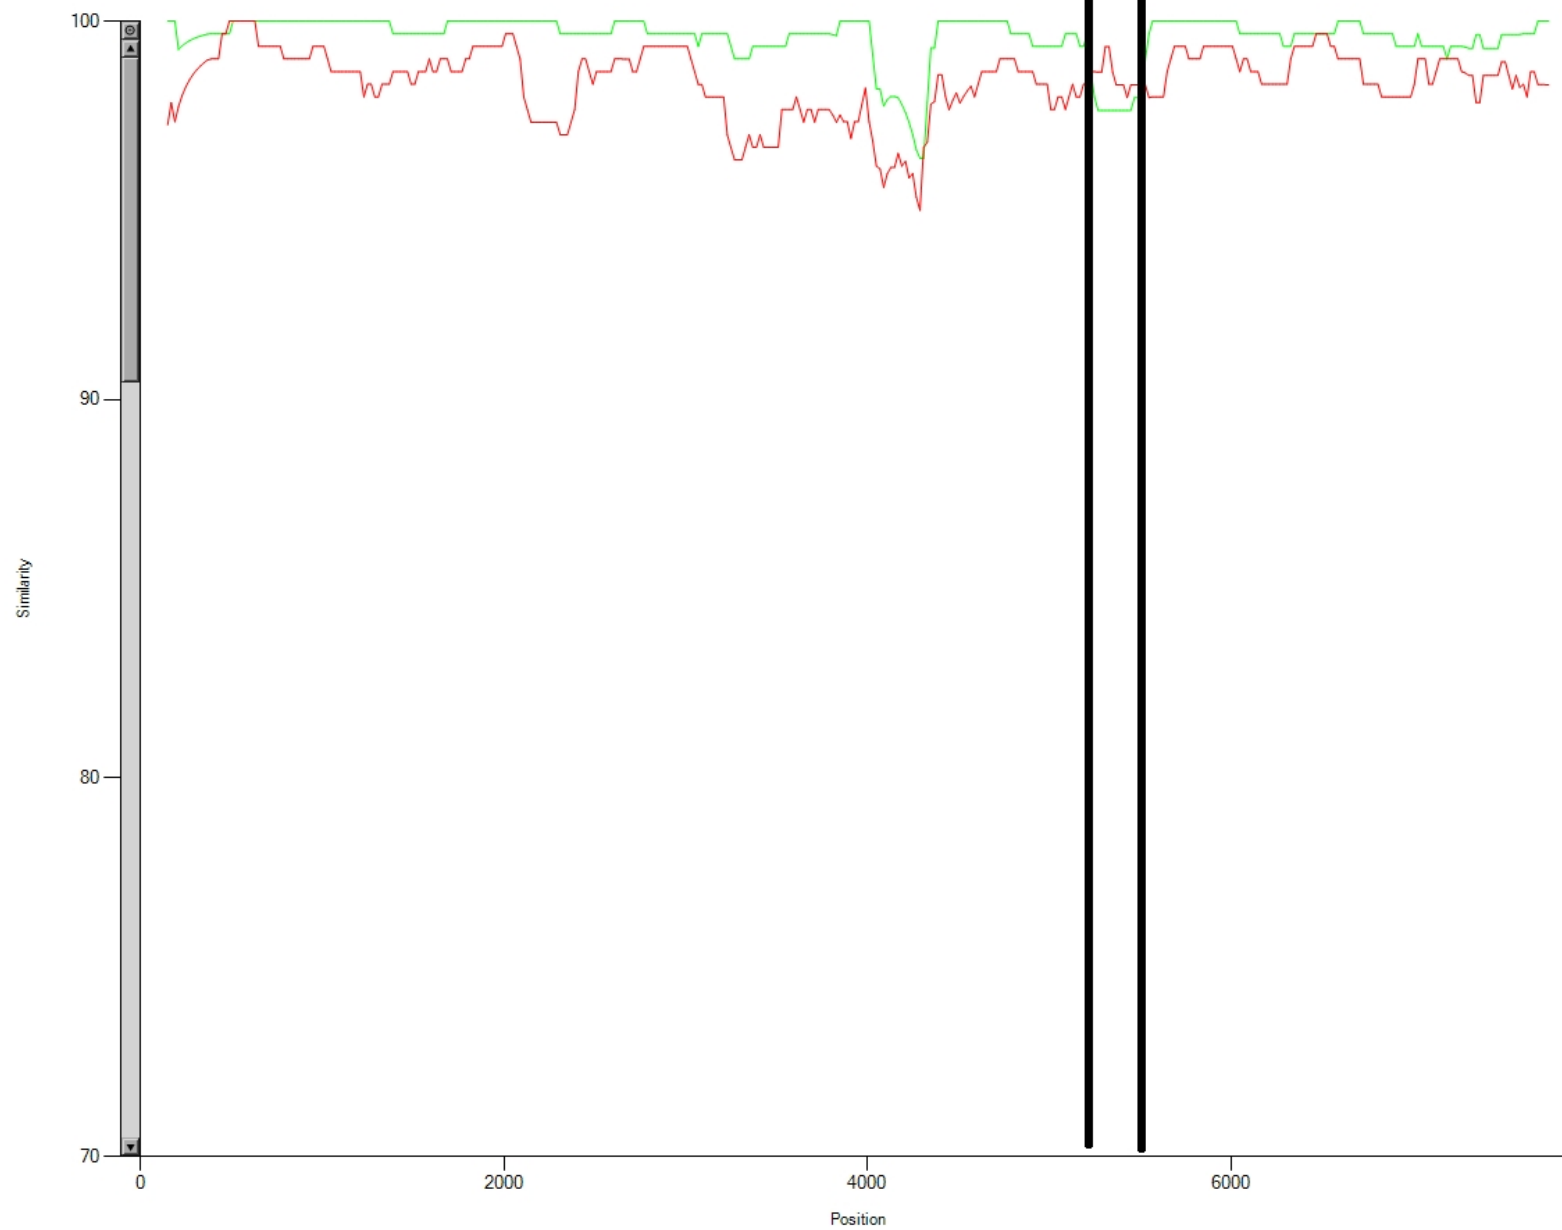

- AF536180
- NC\_001526
- AF472509
- HQ644257

Rec. seq 19

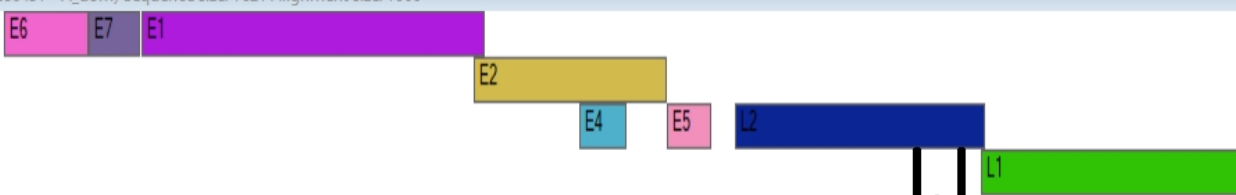

Query sequence (MG850431 - A\_dom) Sequence size: 7621 Alignment size: 7906

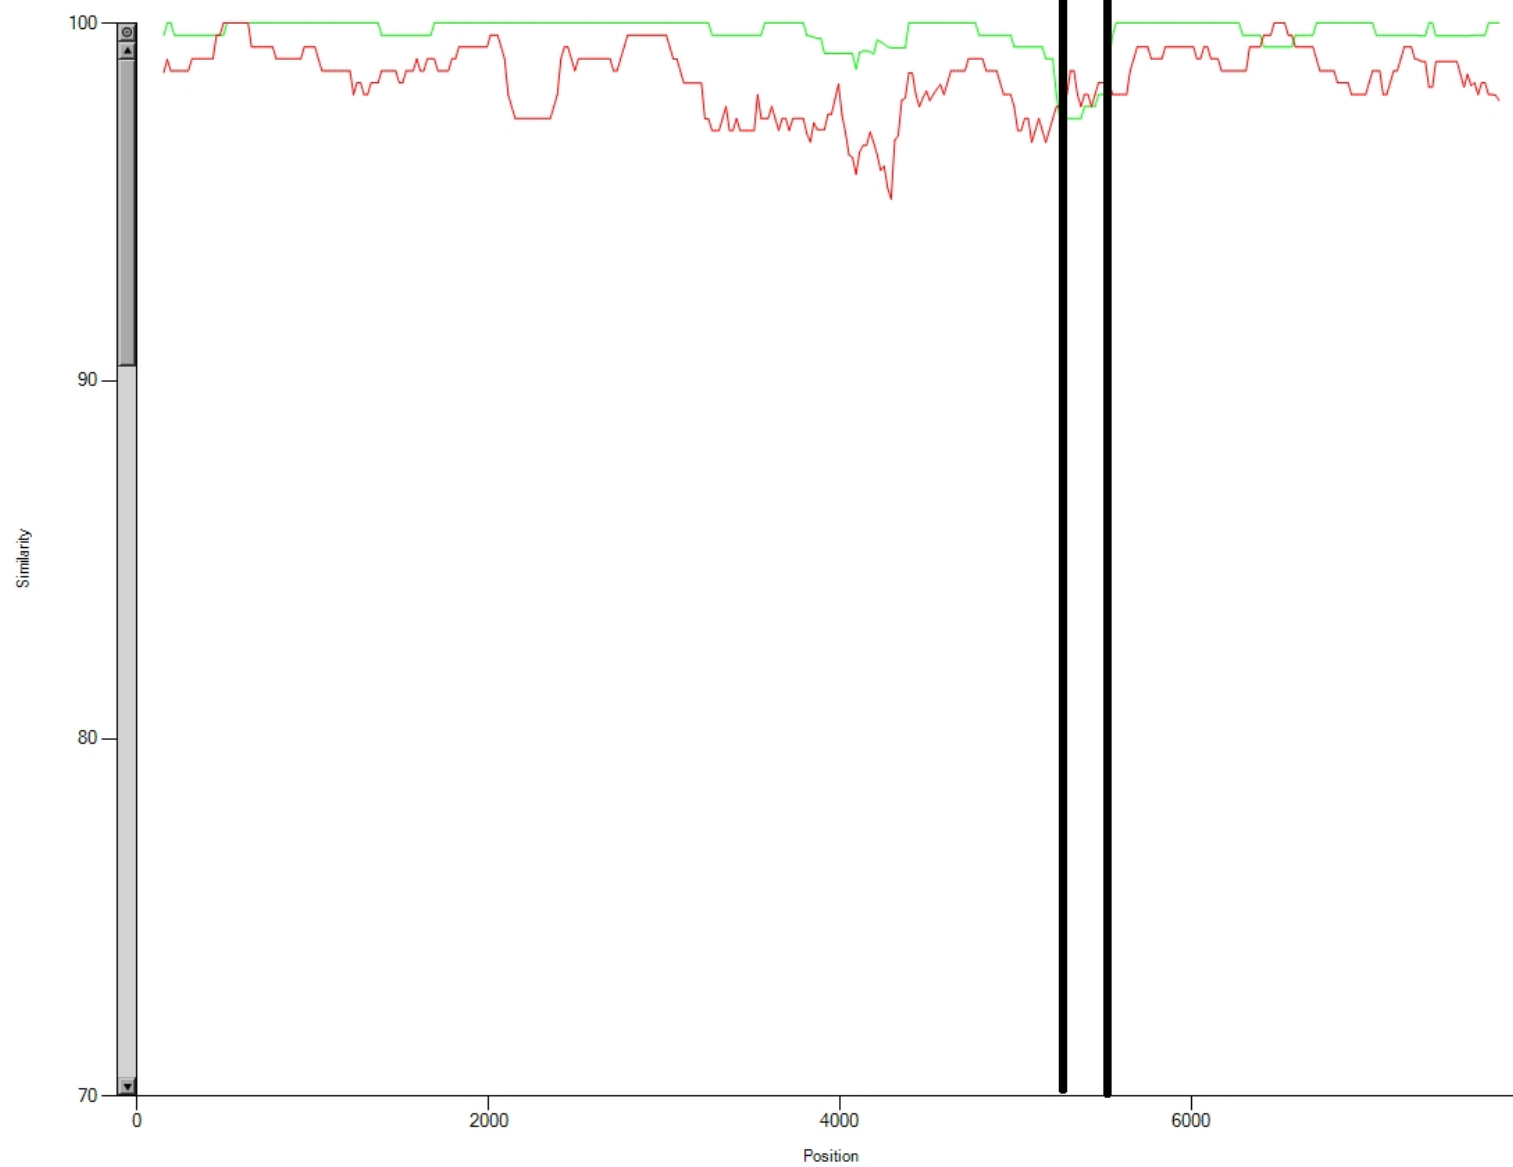

NC\_001526 - A  
AF536180 - B  
AF472509 - C  
HQ644257 - D

Rec. seq 20

Similarity

100  
90  
80  
70

0

2000

Position

4000

6000

Query sequence (MT316214.1 - A\_recombinant) Sequence size: 7777  
Step: 20 - Window: 300

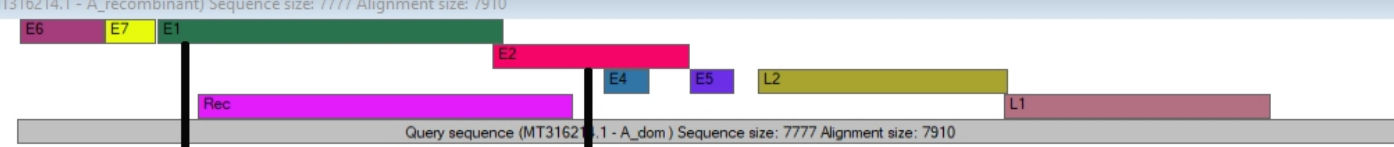

- HQ644257.1 - D
- AF472509.1 - C
- NC\_001526.4 - A
- AF536180.1 - B



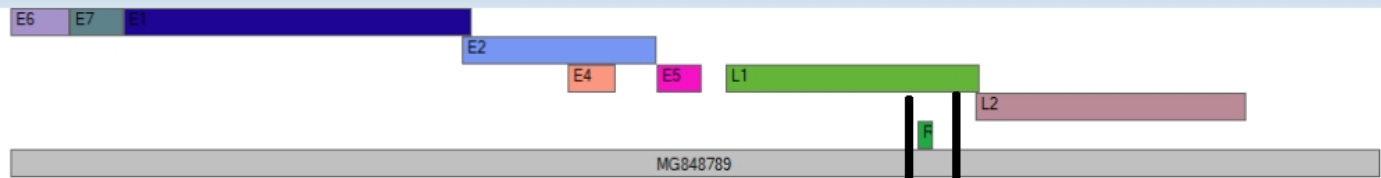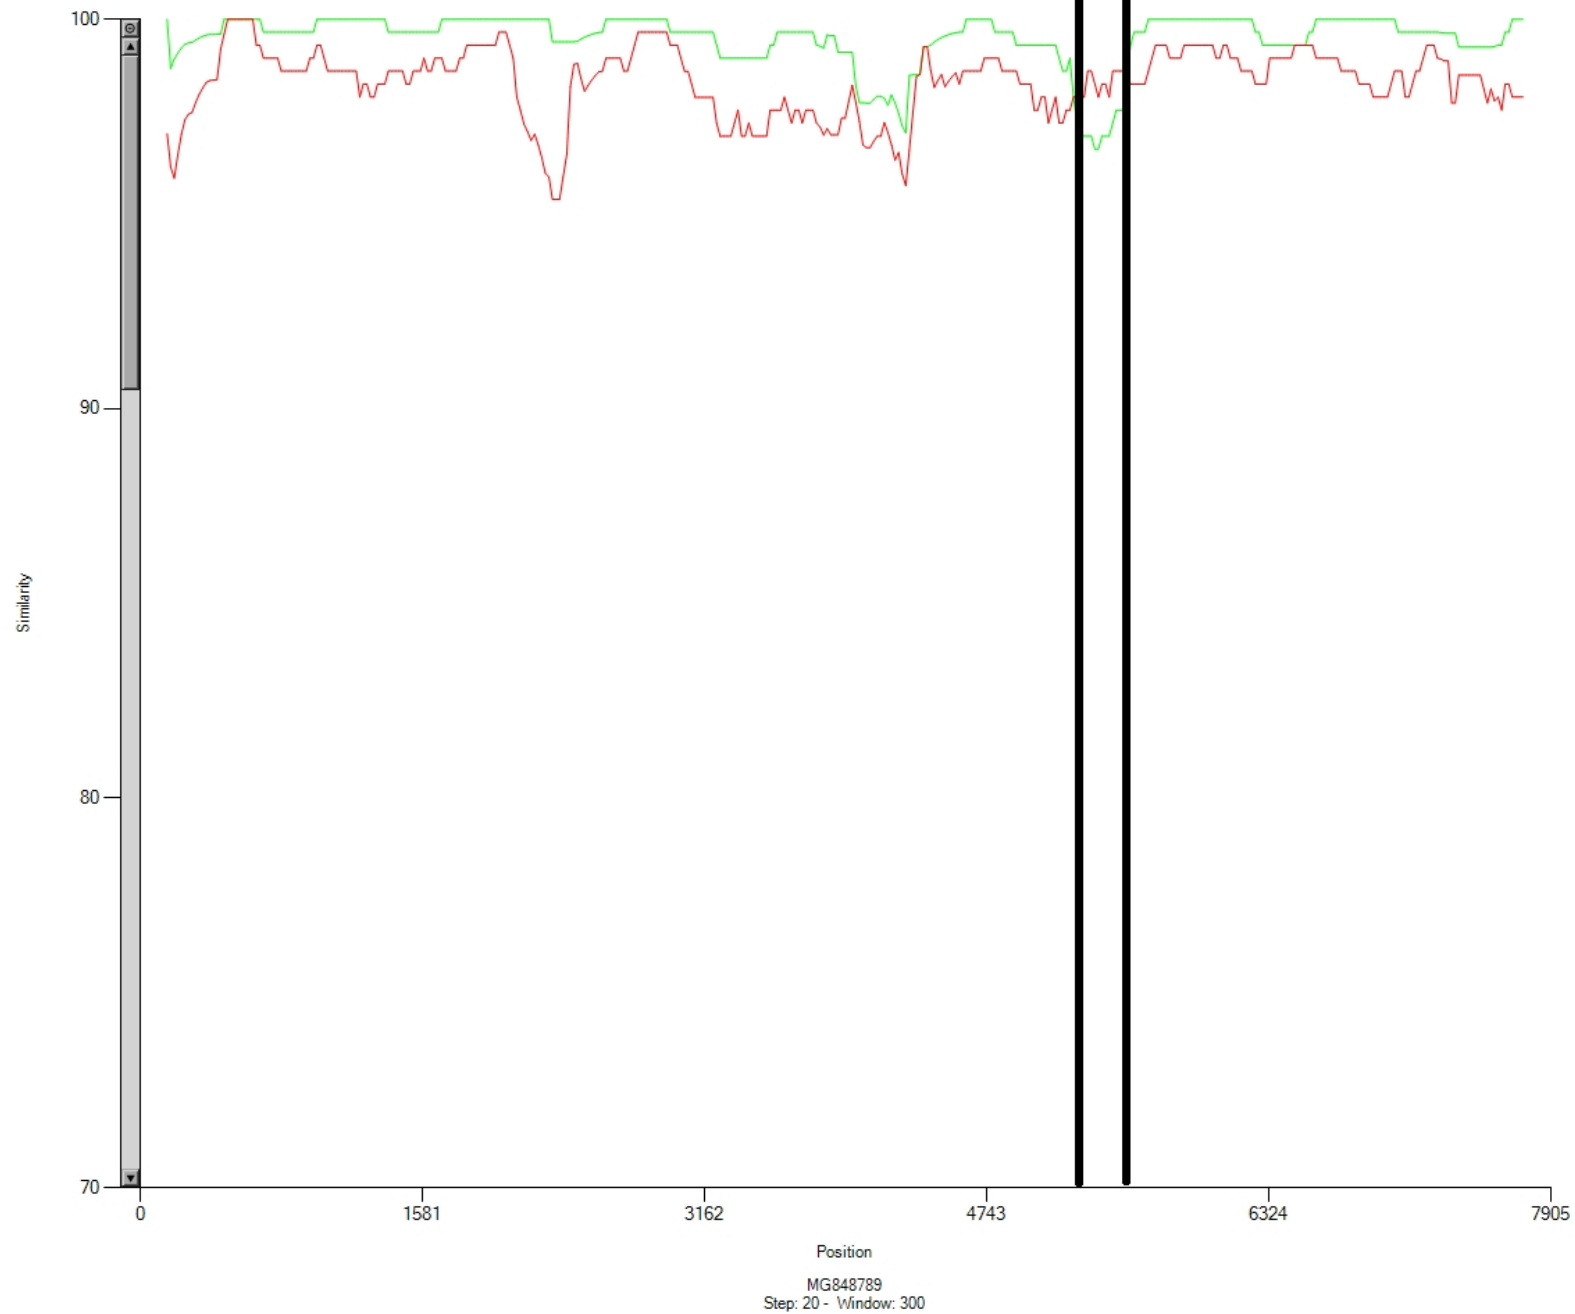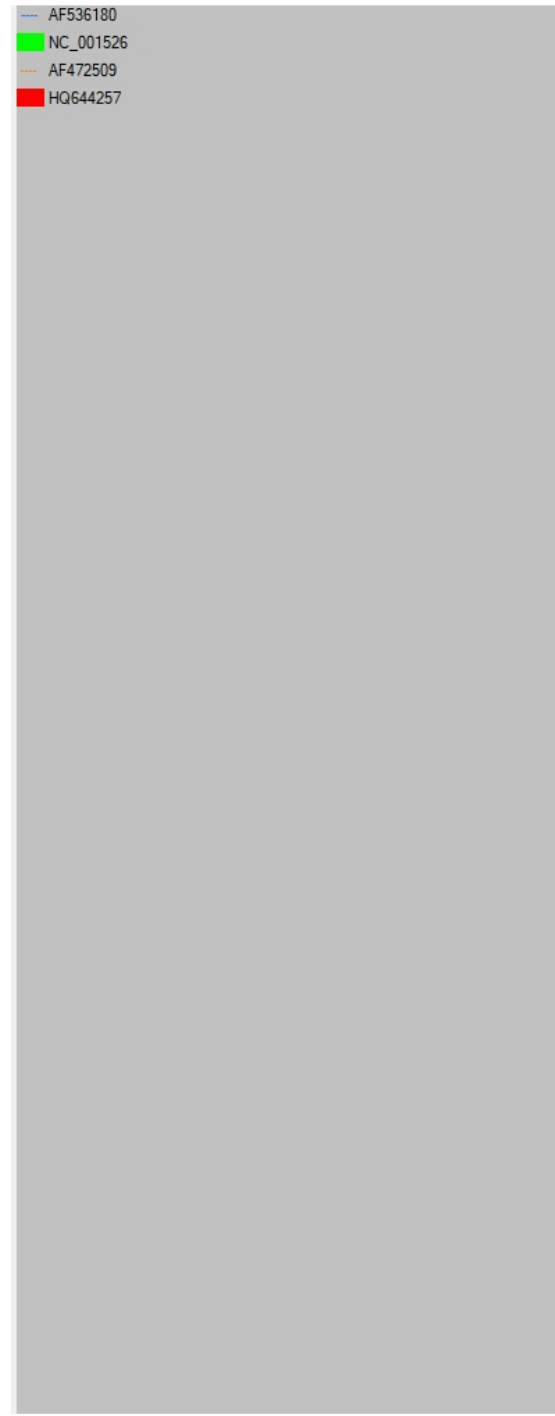

Rec. seq 22

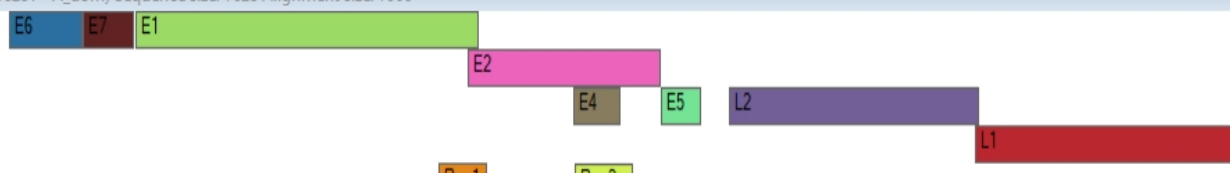

Rec1

Rec2

Query sequence (MT316281 - A\_dom) Sequence size: 7628 Alignment size: 7906

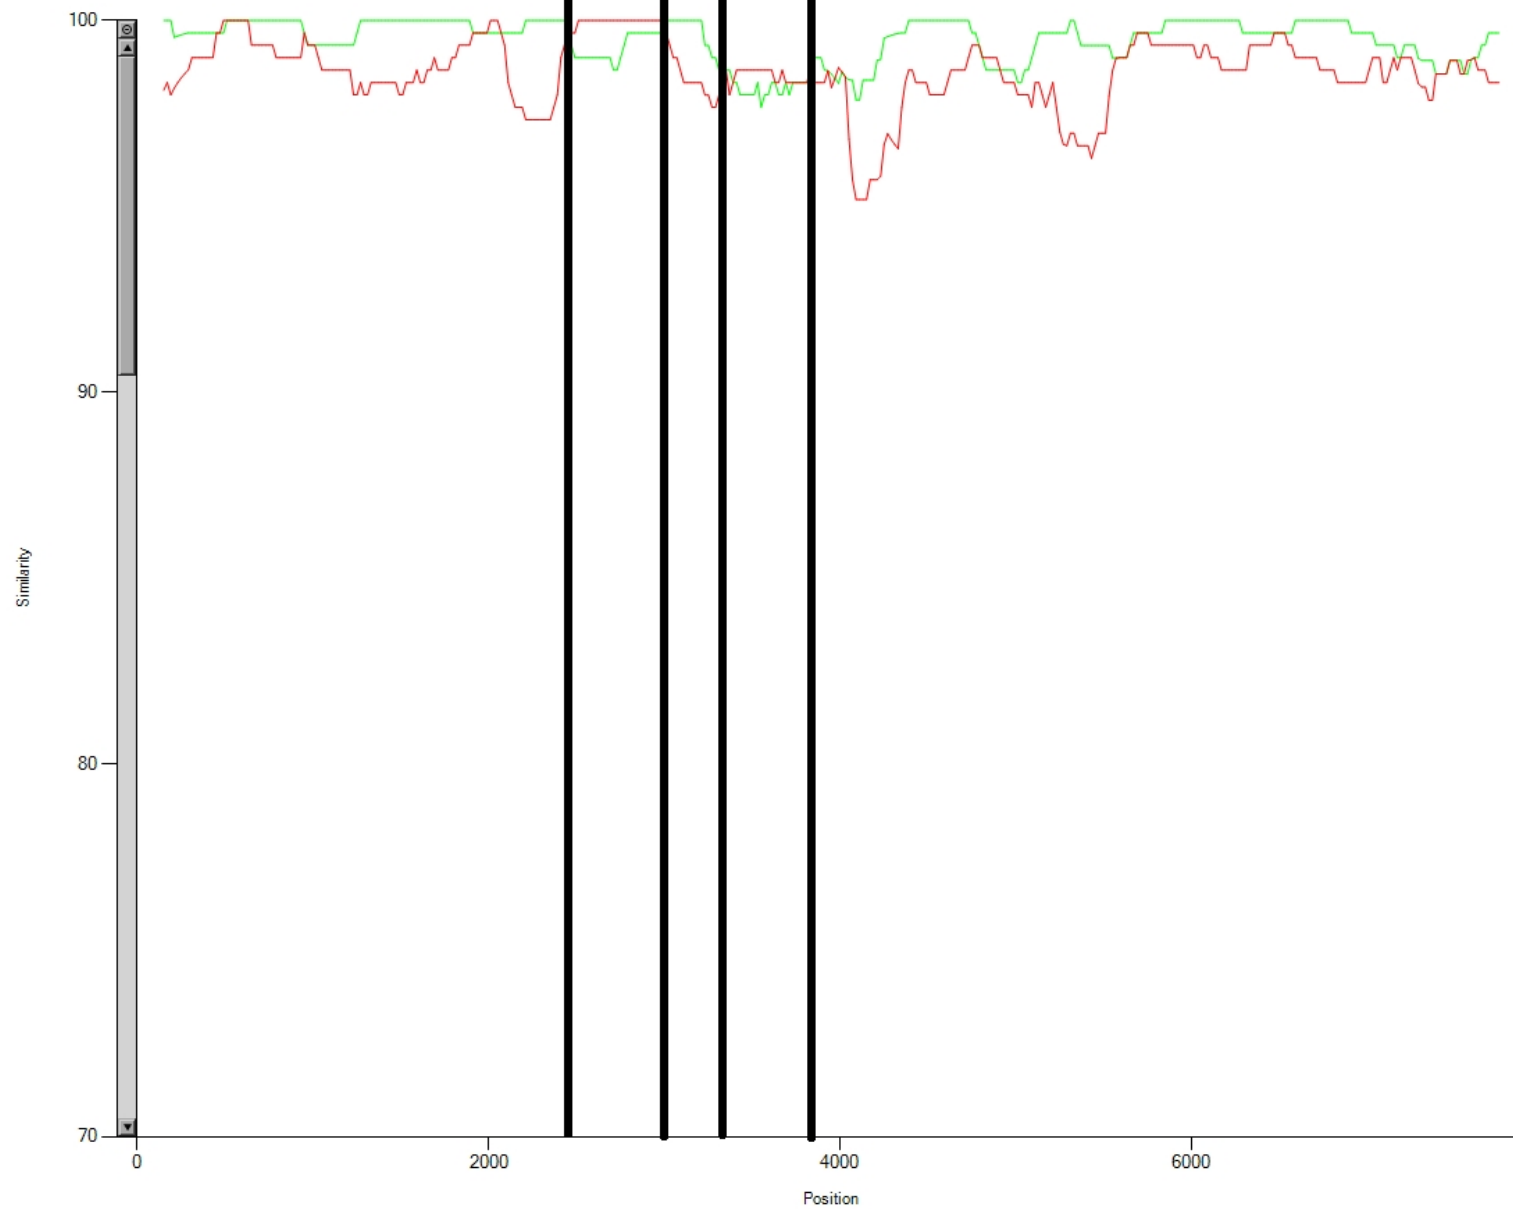

NC\_001526 - A  
AF536180 - B  
AF472509 - C  
HQ644257 - D

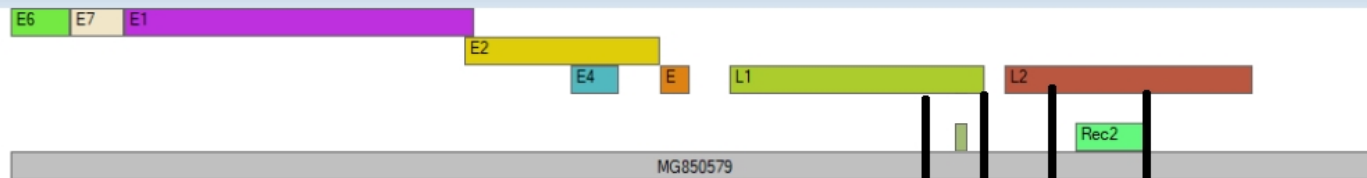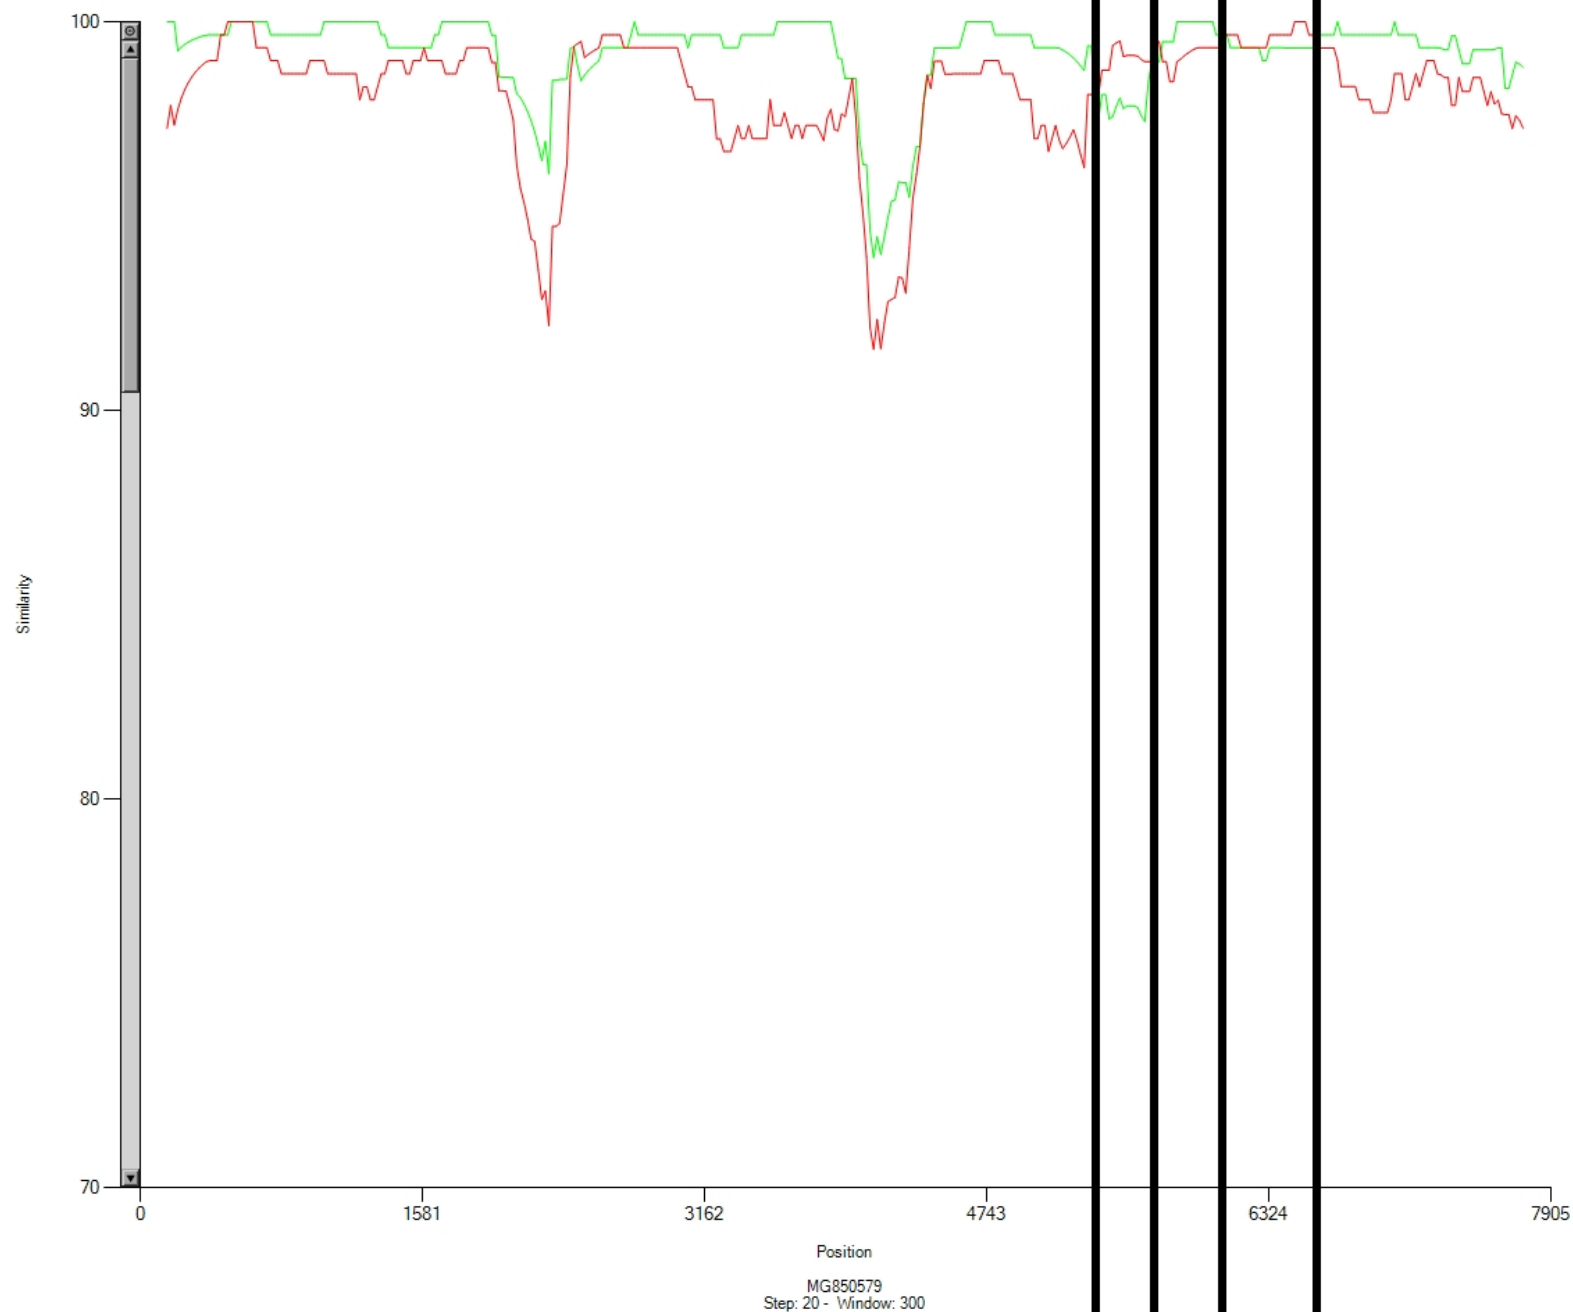

AF536180

NC\_001526

AF472509

HQ644257

Rec. seq 24

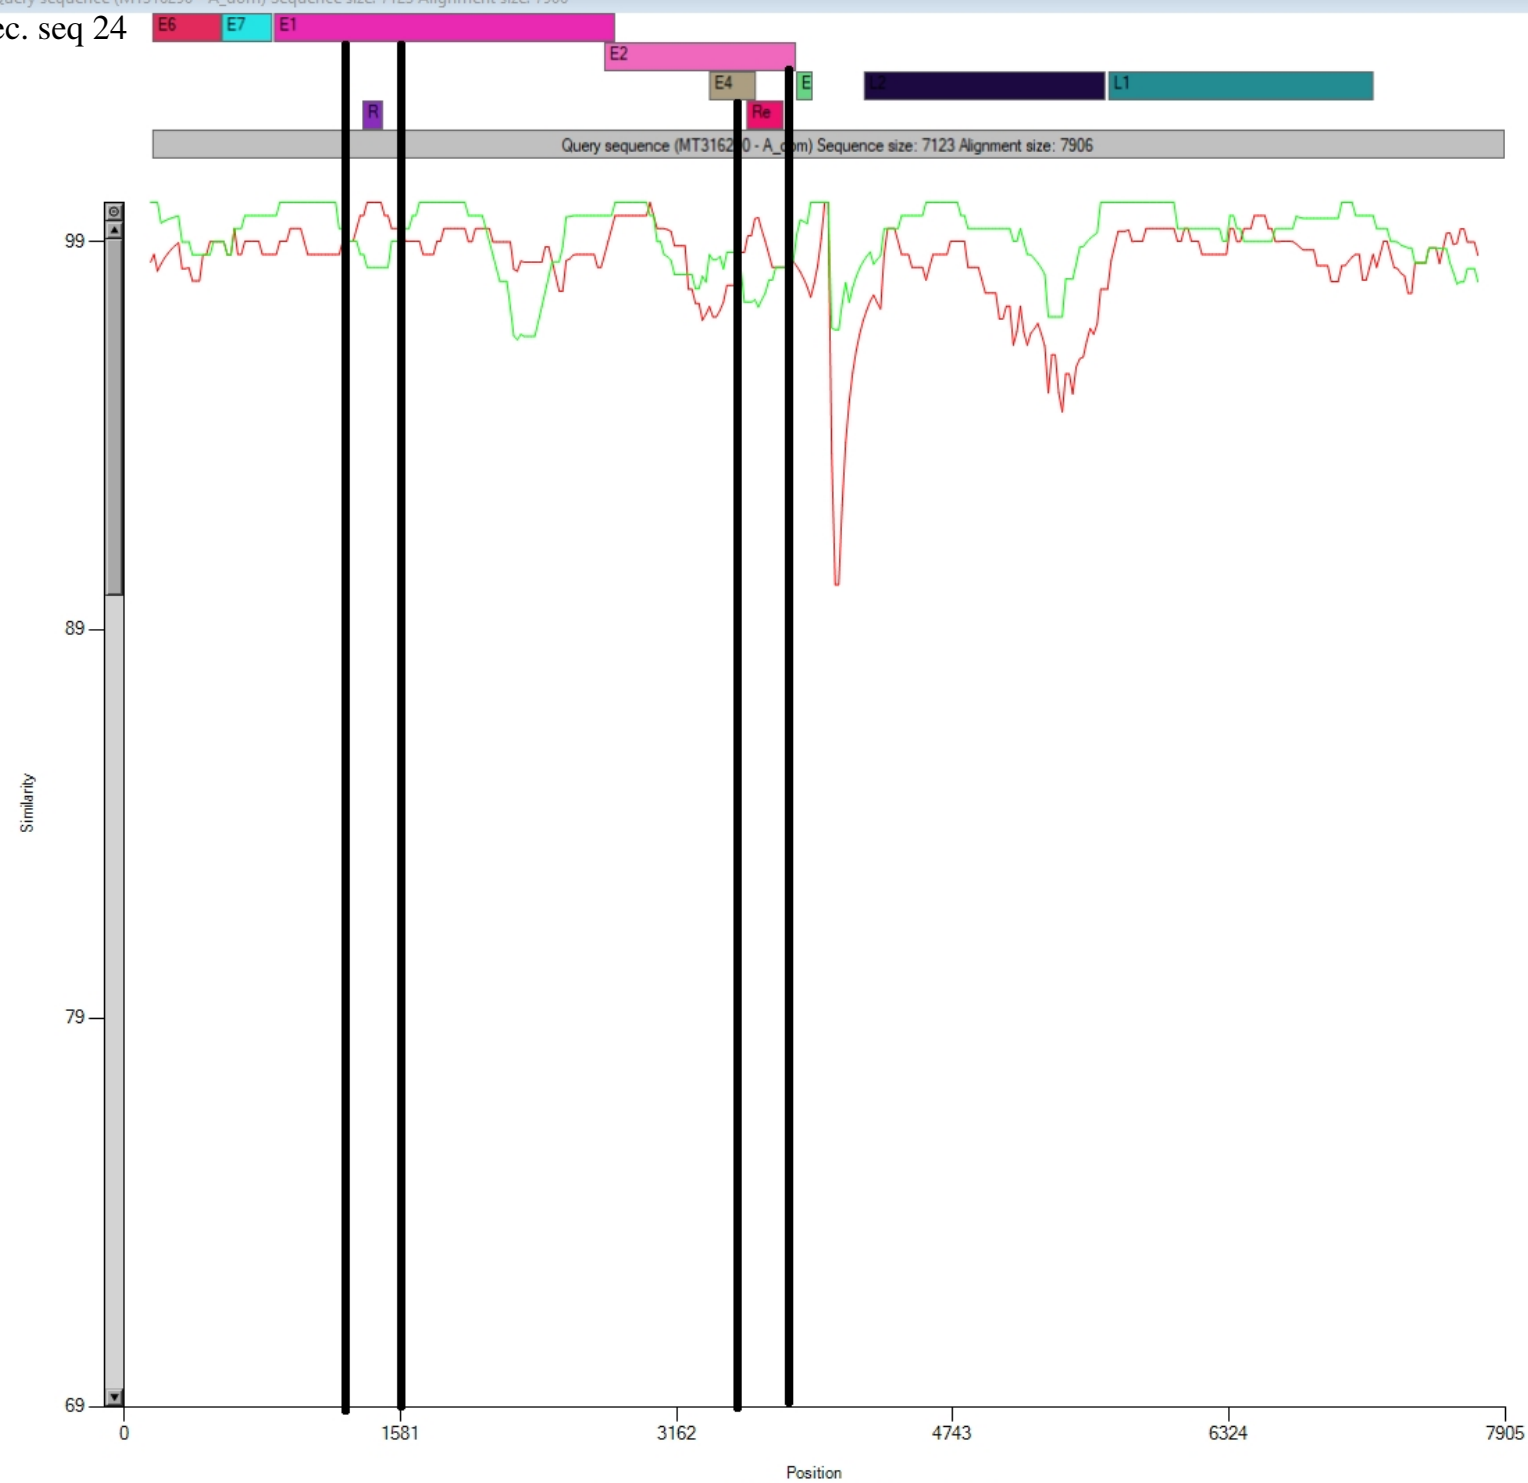

HQ644257 - D  
AF472509 - C  
NC\_001526 - A  
AF536180 - B

Rec. seq 25

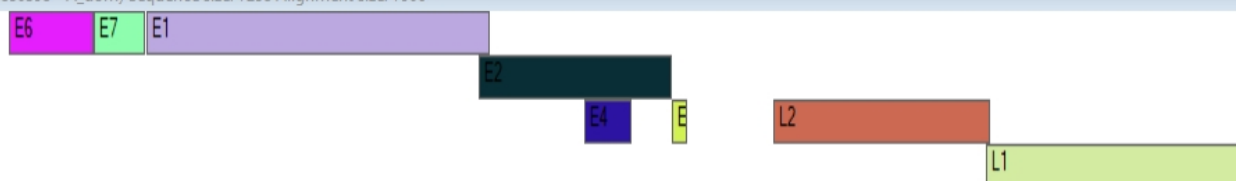

Query sequence (MG850398 - A\_dom) Sequence size: 7258 Alignment size: 7906

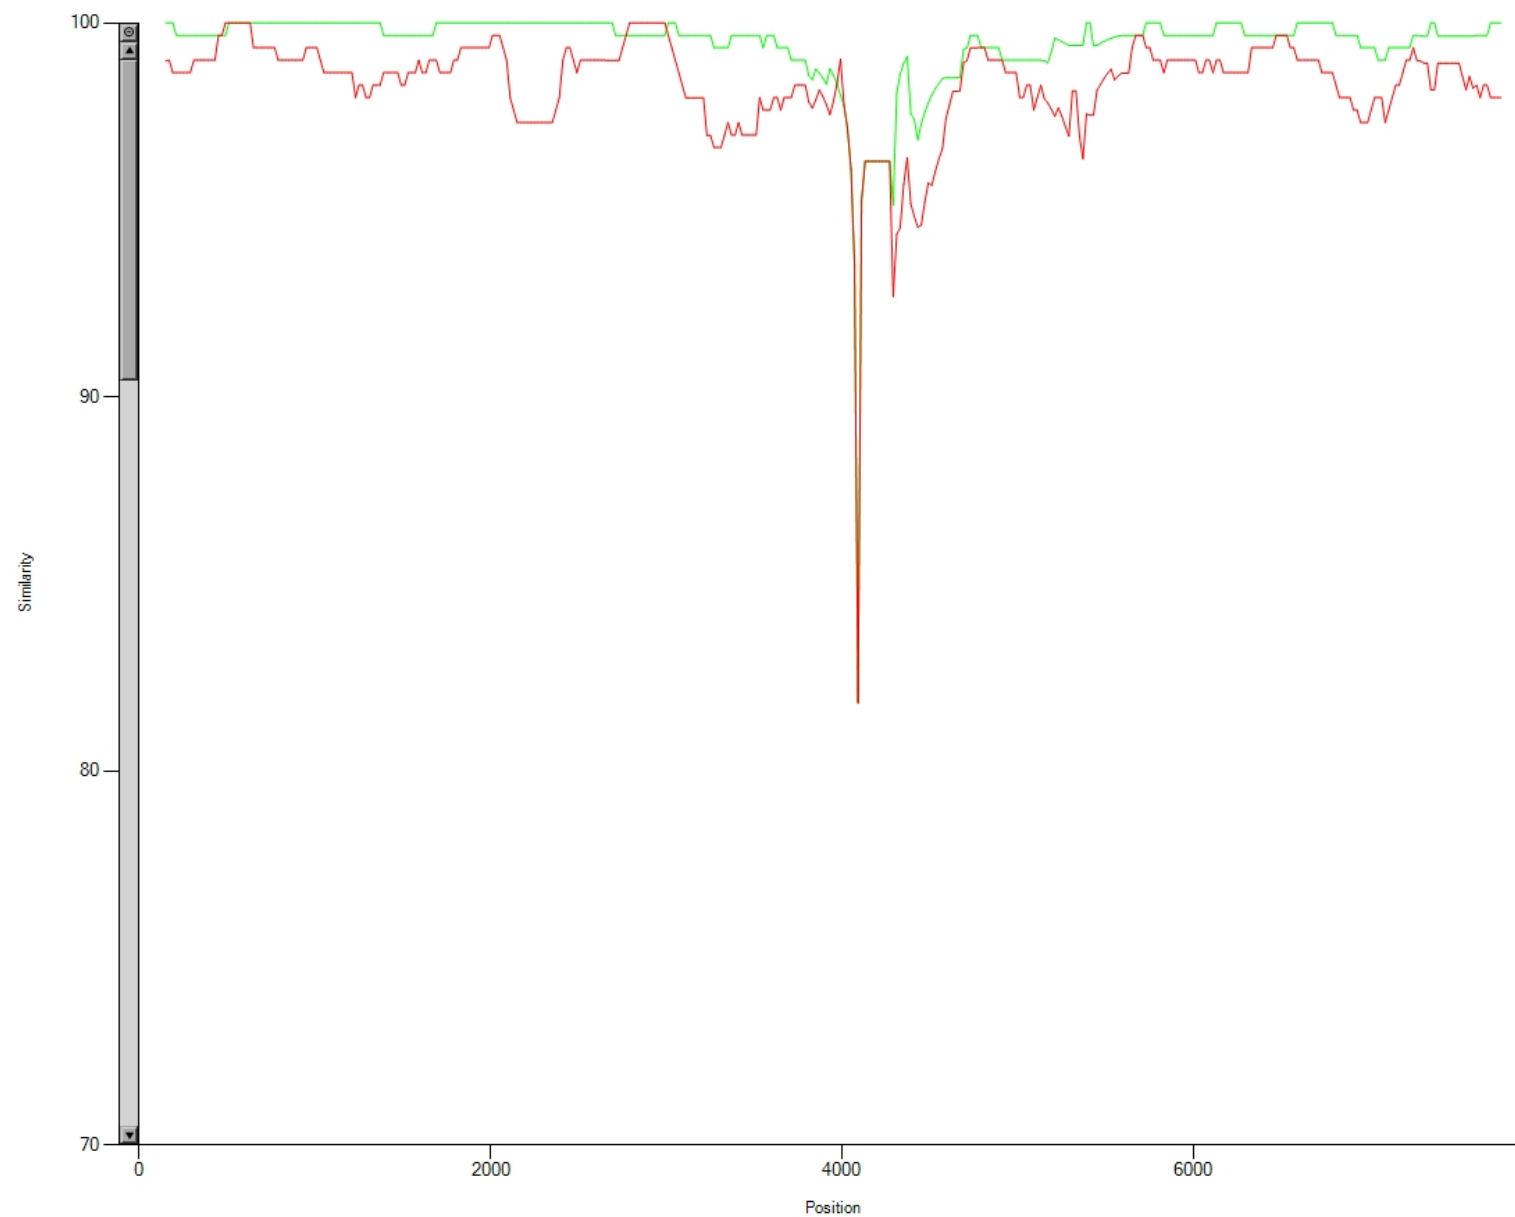

Query sequence (MG850398 - A\_dom) Sequence size: 7258  
Step: 20 - Window: 300

NC\_001526 - A  
AF536180 - B  
AF472509 - C  
HQ644257 - D

Rec. seq 26

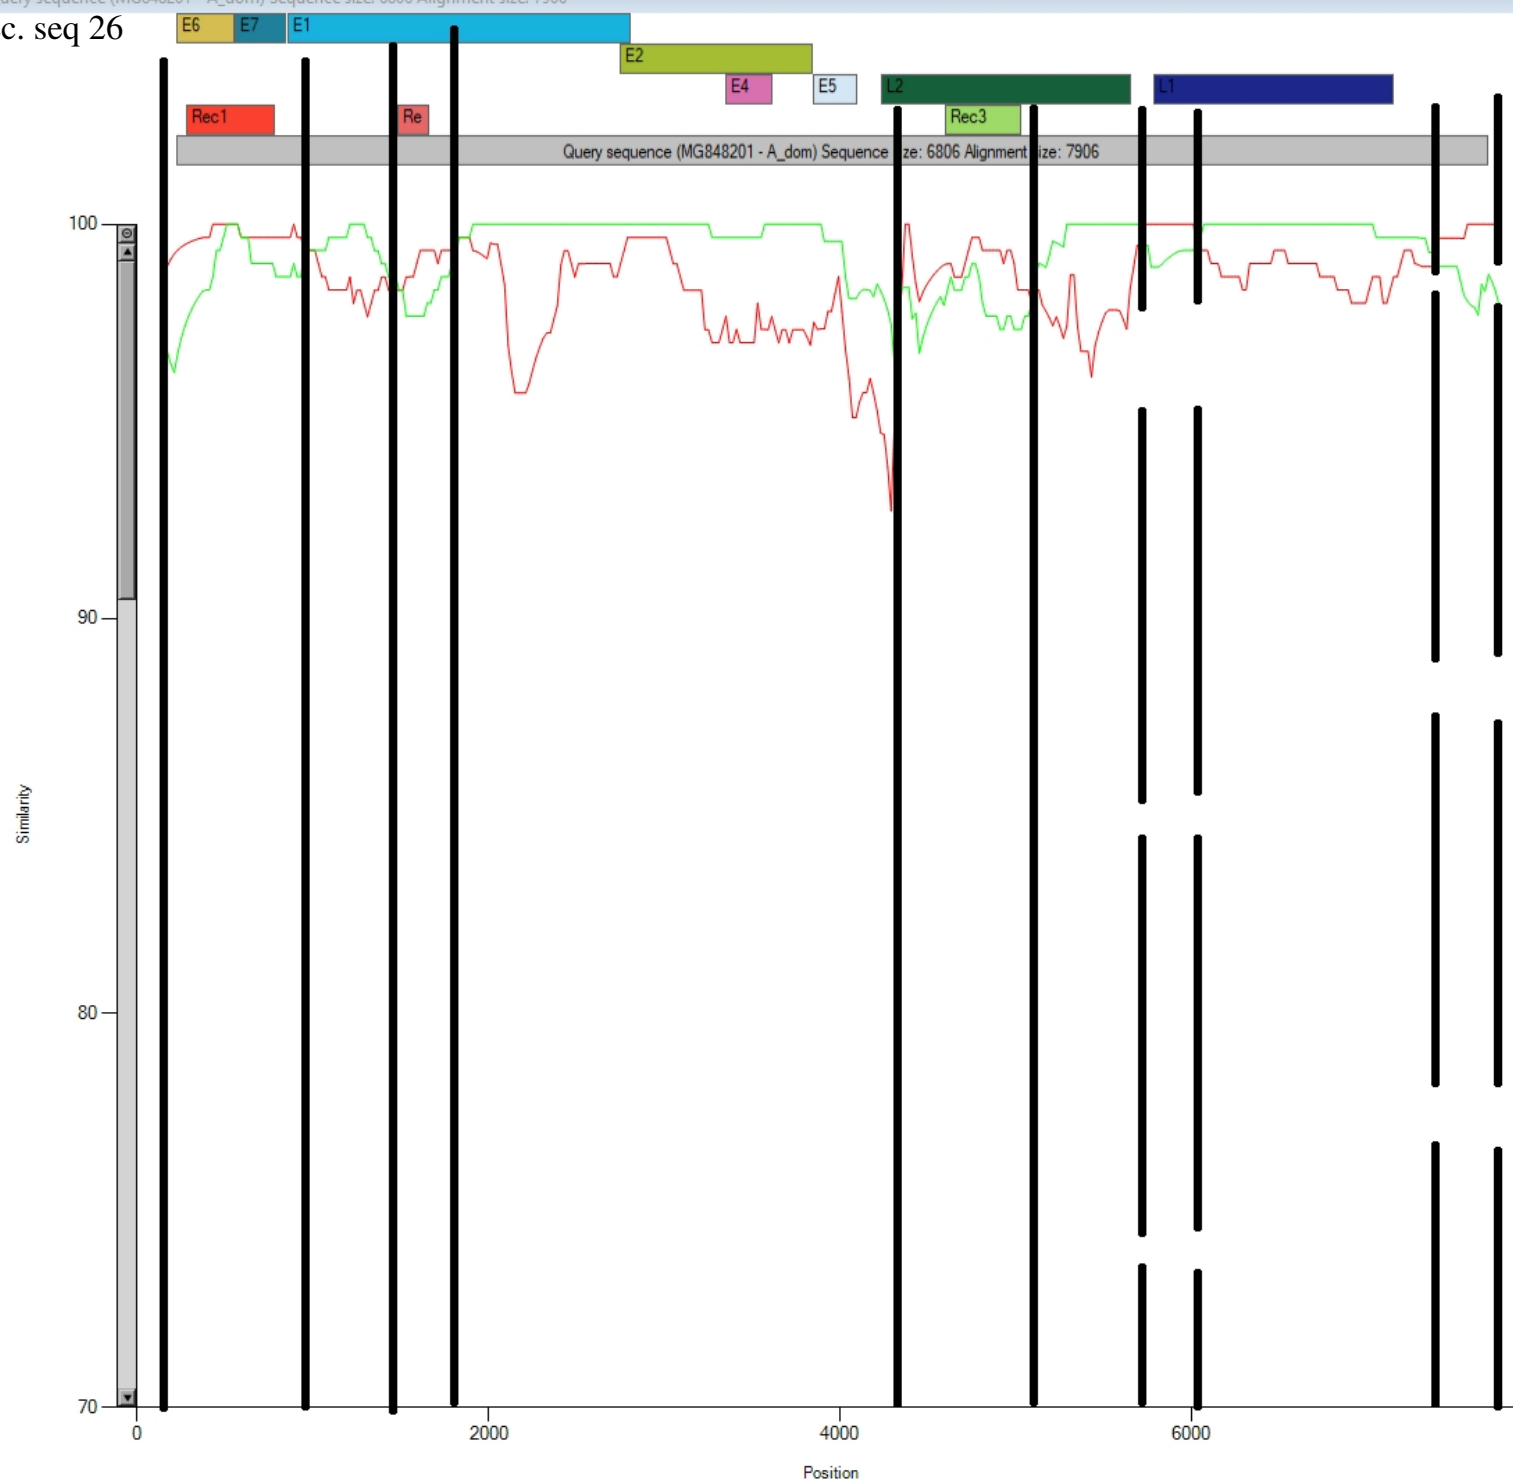

HQ644257 - D  
AF472509 - C  
NC\_001526 - A  
AF536180 - B

Dotted lines represent the lower confidence  
recombination crossover sites  
(recombination events supported by 2 or  
less lineage specific SNPs)

Rec. seq 27

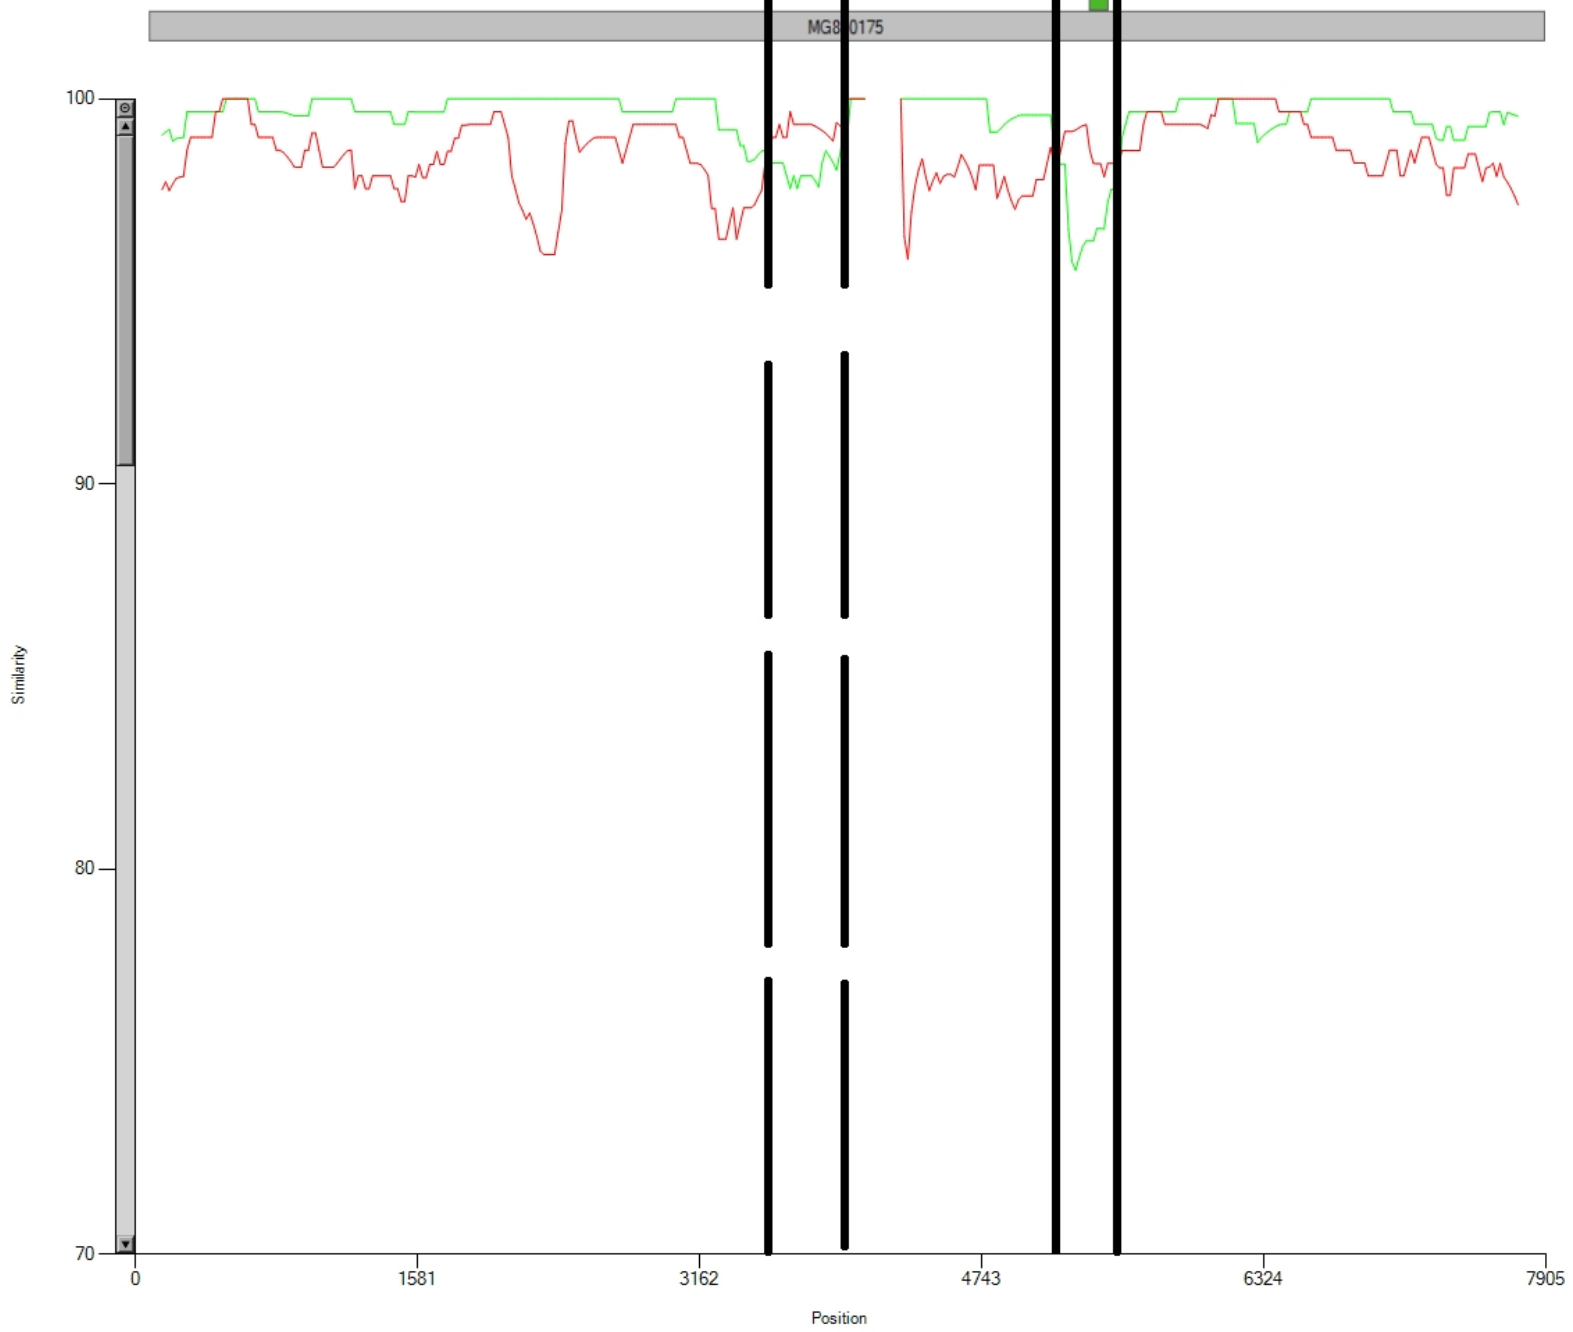

- AF536180
- NC\_001526
- AF472509
- HQ644257

Dotted lines represent the lower confidence recombination crossover sites (recombination events supported by 2 or less lineage specific SNPs)

Rec. seq 28

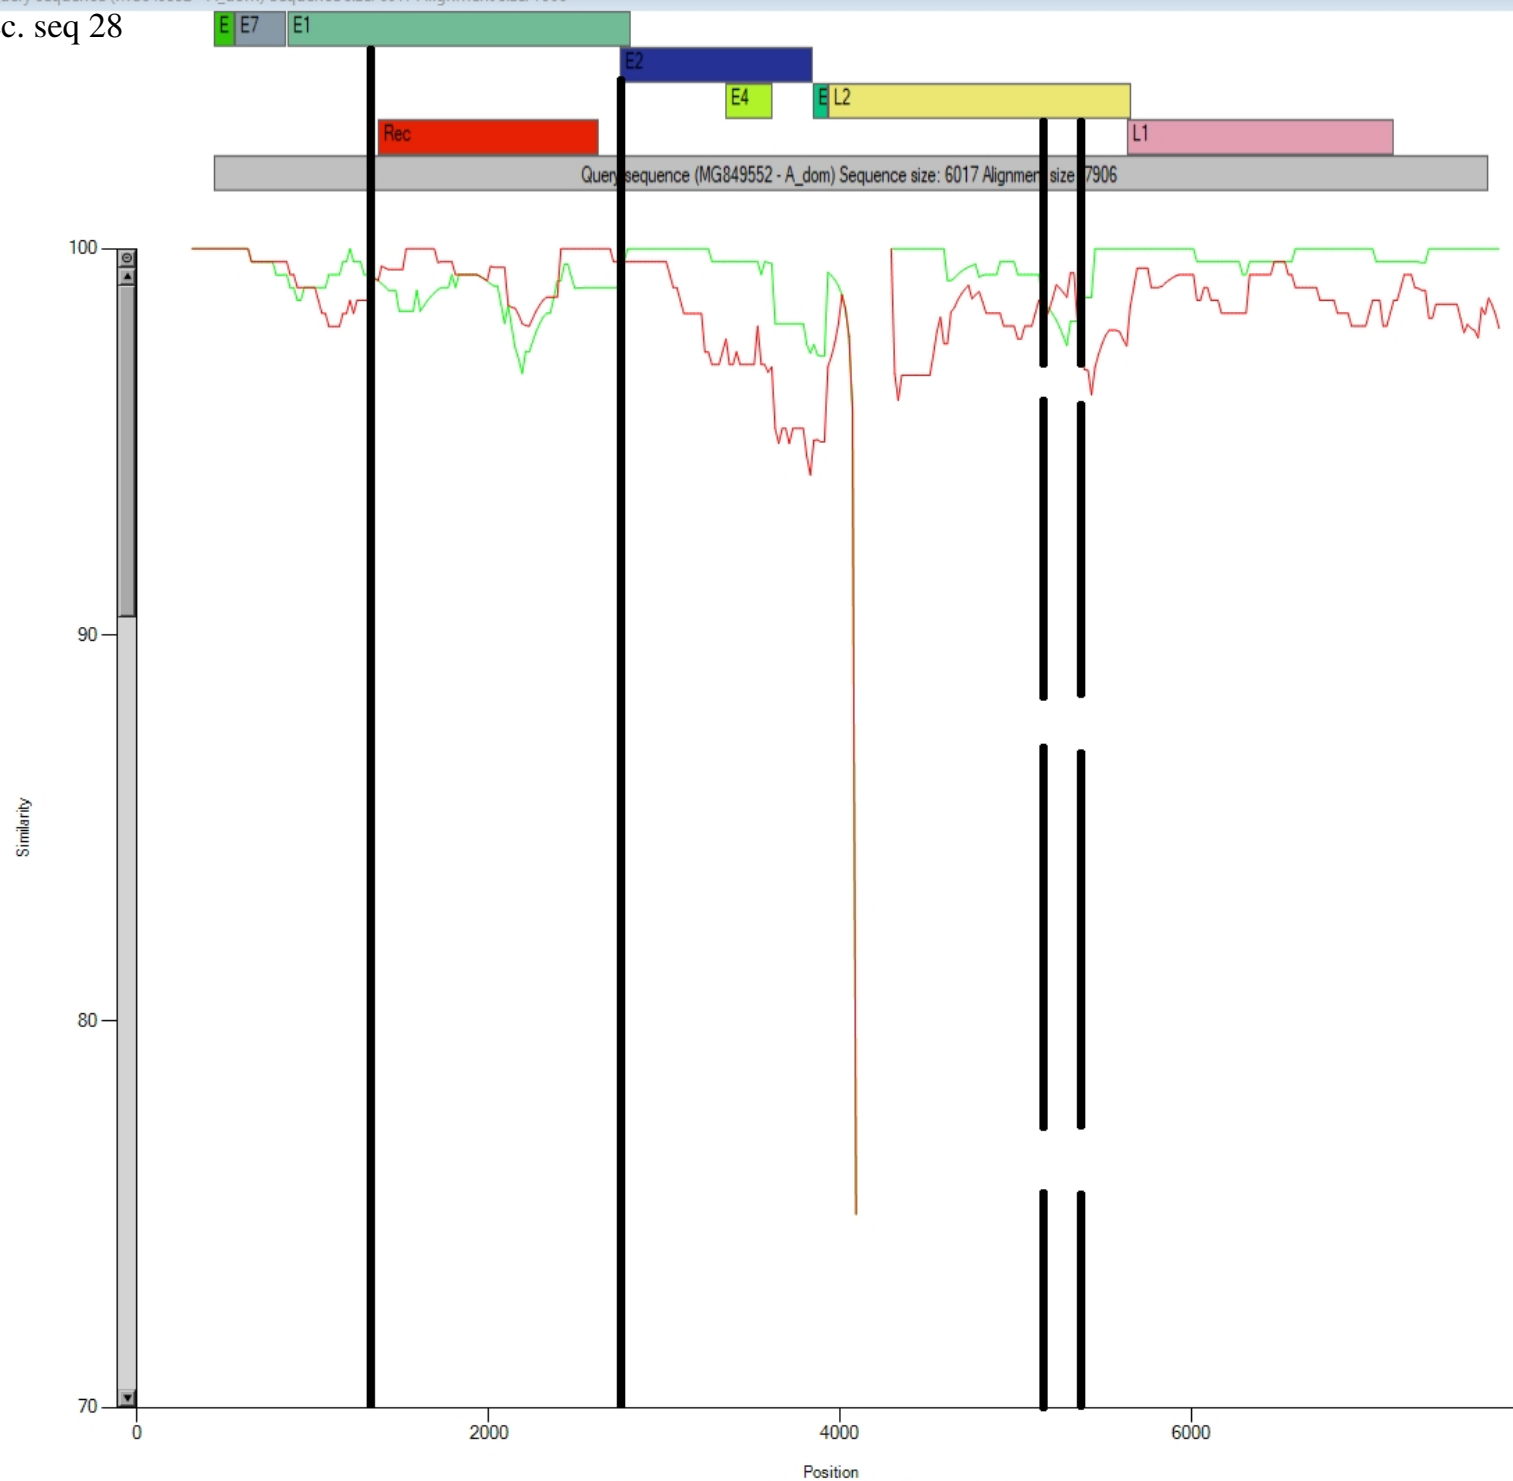

Query sequence (MG849552 - A\_dom) Sequence size: 6017  
Step: 20 - Window: 300

NC\_001526 - A  
AF536180 - B  
AF472509 - C  
HQ644257 - D

Dotted lines represent the lower confidence  
recombination crossover sites  
(recombination events supported by 2 or  
less lineage specific SNPs)



Rec. seq 29

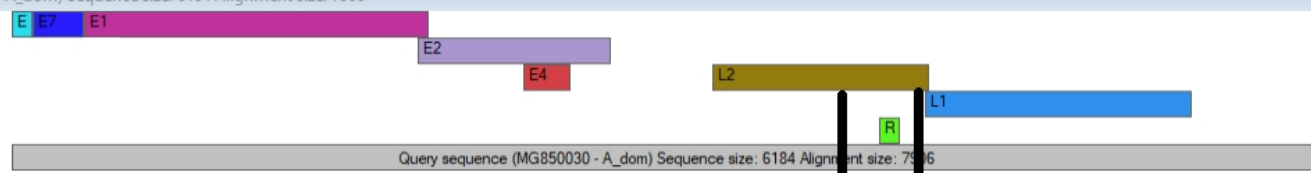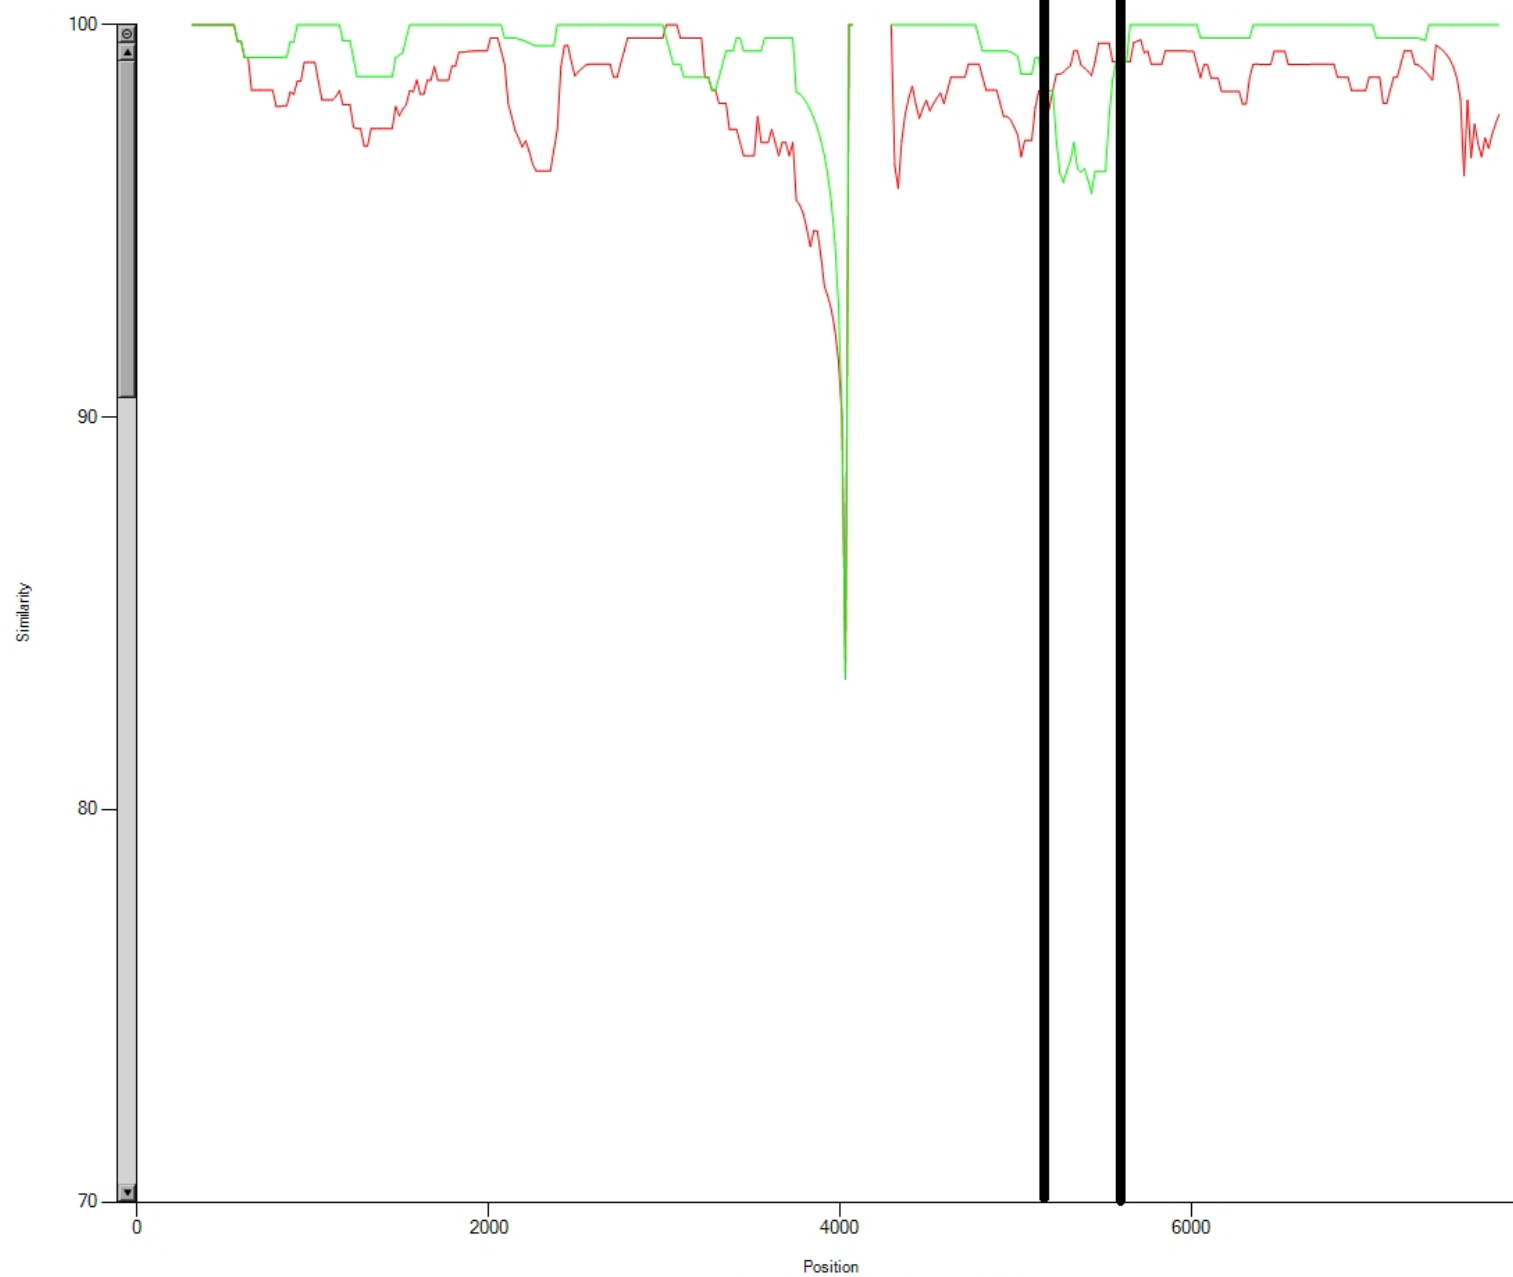

- HQ644257 - D
- AF472509 - C
- AF536180 - B
- NC\_001526 - A

Rec. seq 30

Similarity

100  
90  
80  
70

0

2000

Position

4000

6000

Query sequence (MG848162 - BCD\_dom) Sequence size: 6947  
Step: 20 - Window: 300

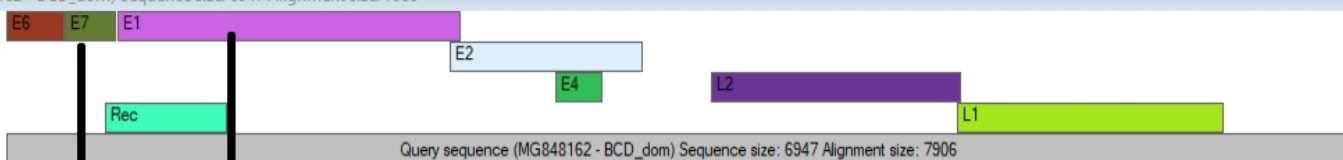

- AF536180 - B
- NC\_001526 - A
- AF472509 - C
- HQ644257 - D

Rec. seq 31

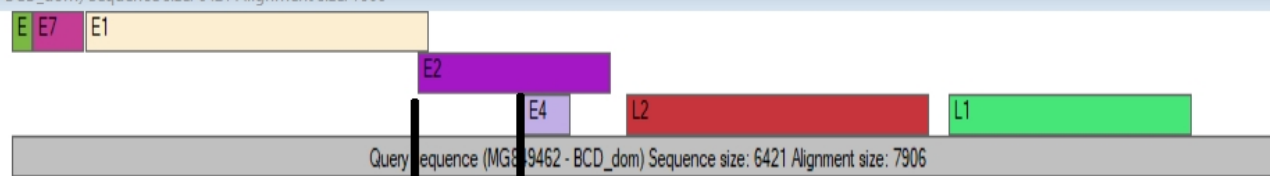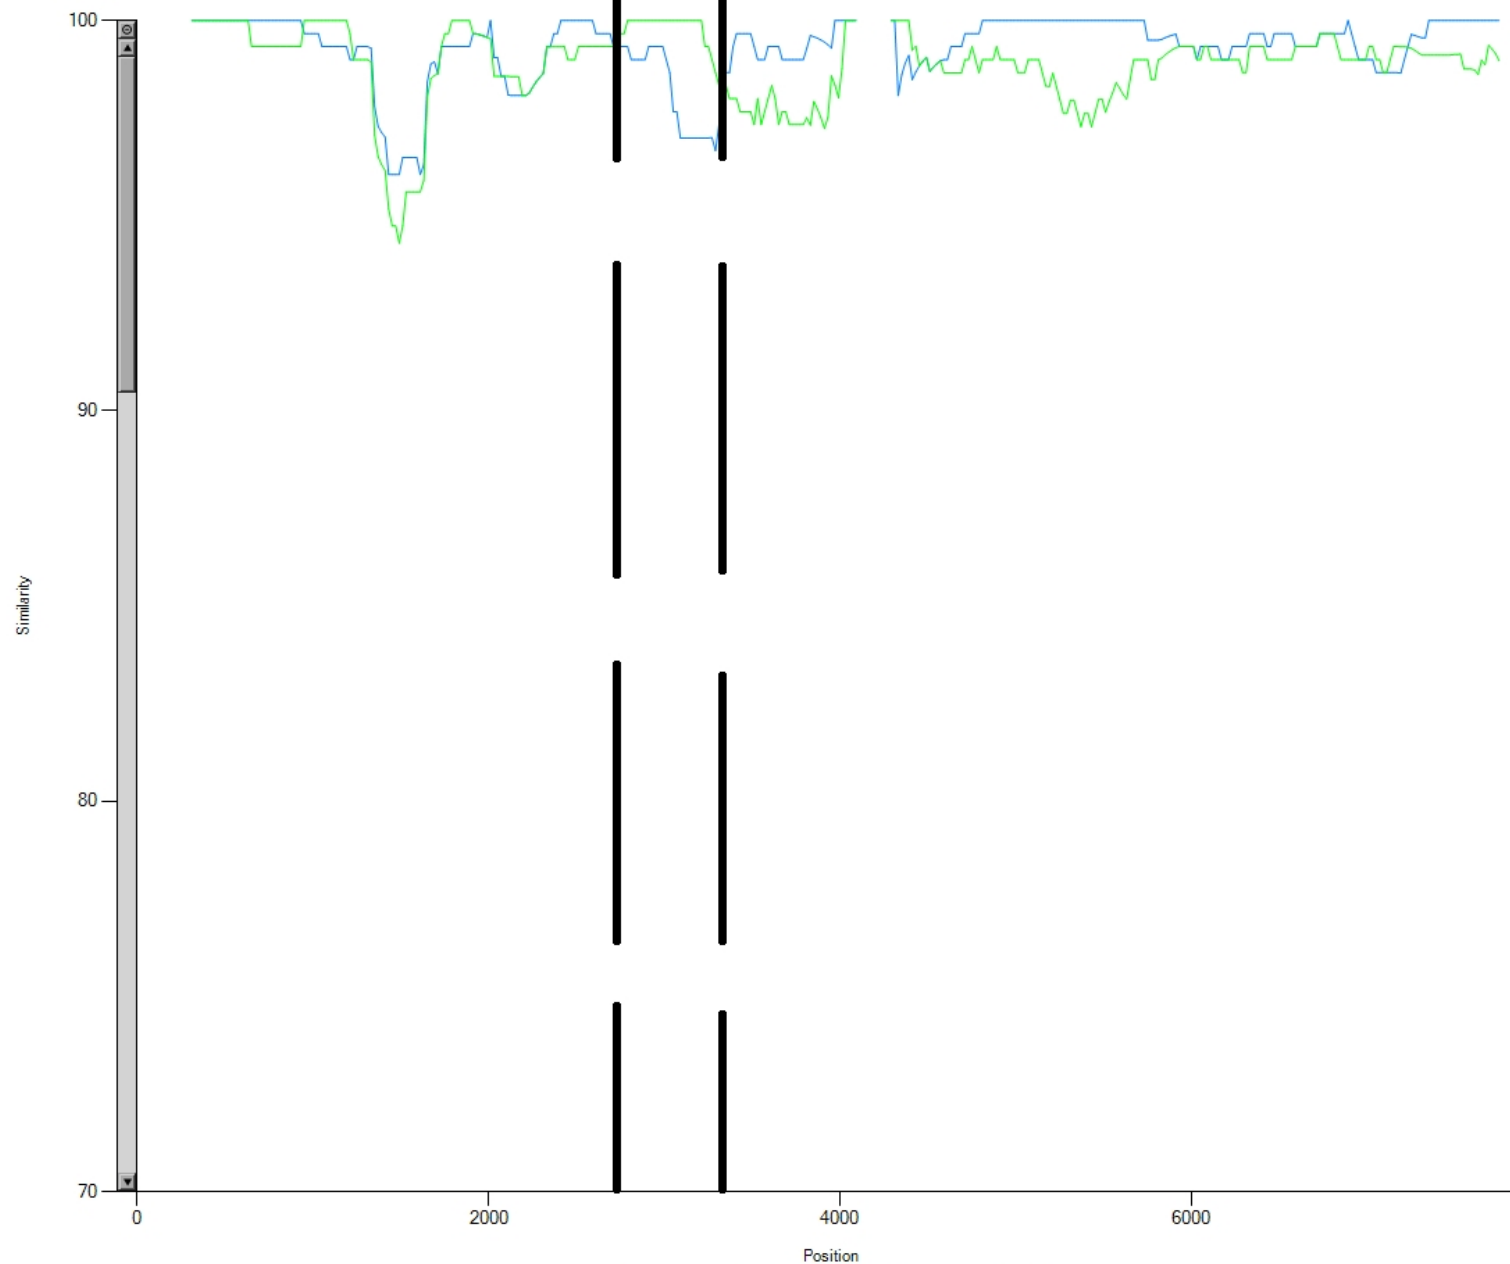

Query sequence (MG849462 - BCD\_dom) Sequence size: 6421  
Step: 20 - Window: 300

AF536180 - B  
NC\_001526 - A  
AF472509 - C  
HQ644257 - D

Dotted lines represent the lower confidence recombination crossover sites (recombination events supported by 2 or less lineage specific SNPs)

Rec. seq 32

Similarity

100  
90  
80  
70

Query sequence (KY549190.1 - Ungrouped) Sequence size: 7906 Alignment size: 7910

Query sequence (KY549190.1 - Ungrouped) Sequence size: 7906  
Step: 20 - Window: 300

- HQ644257.1 - D
- AF536180.1 - B
- AF472509.1 - C
- NC\_001526.4 - A

E6 E7 E1

E2

E4

E5

L2

L1

Rec1

Rec2

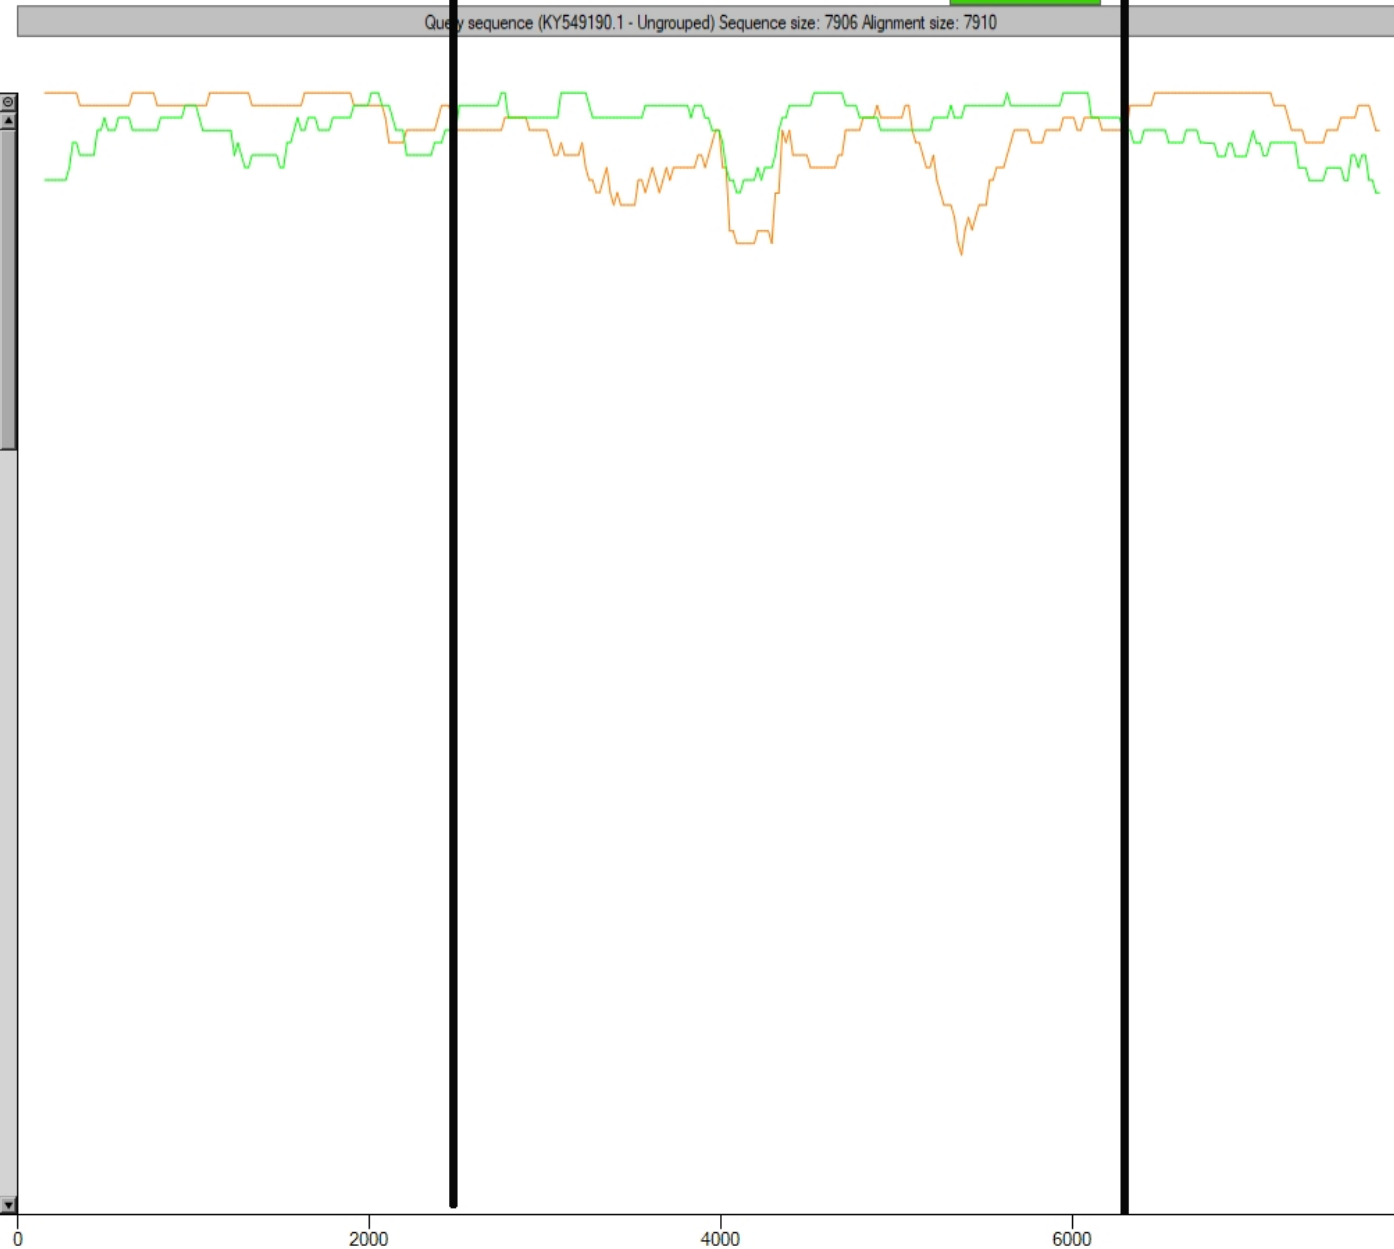

Rec. seq 33

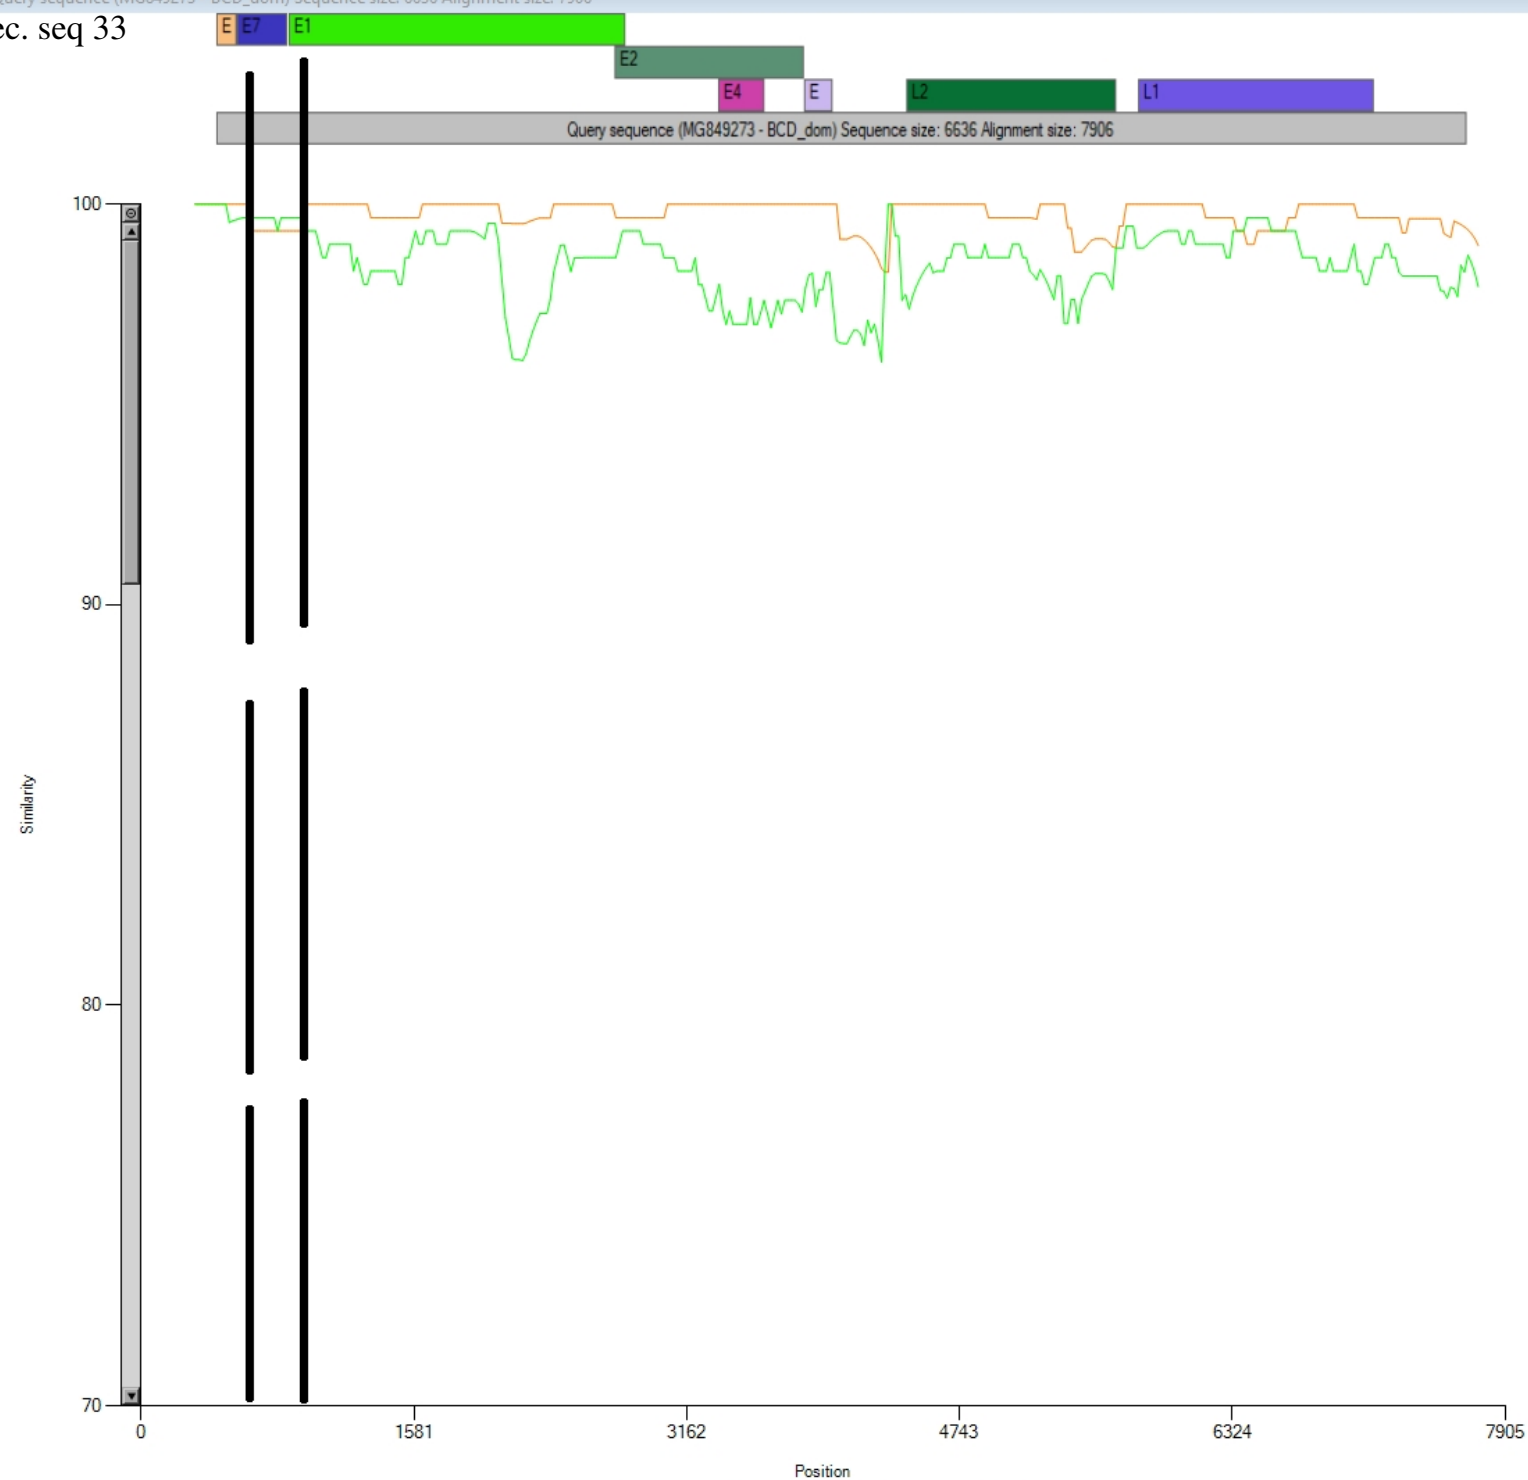

Dotted lines represent the lower confidence recombination crossover sites (recombination events supported by 2 or less lineage specific SNPs)

Rec. seq 34

E6 E7 E1

E2

E4

E5

L2

L1

Rec

Query sequence (MT316301.1 - D\_dom) S Sequence size: 7879 Alignment size: 7910

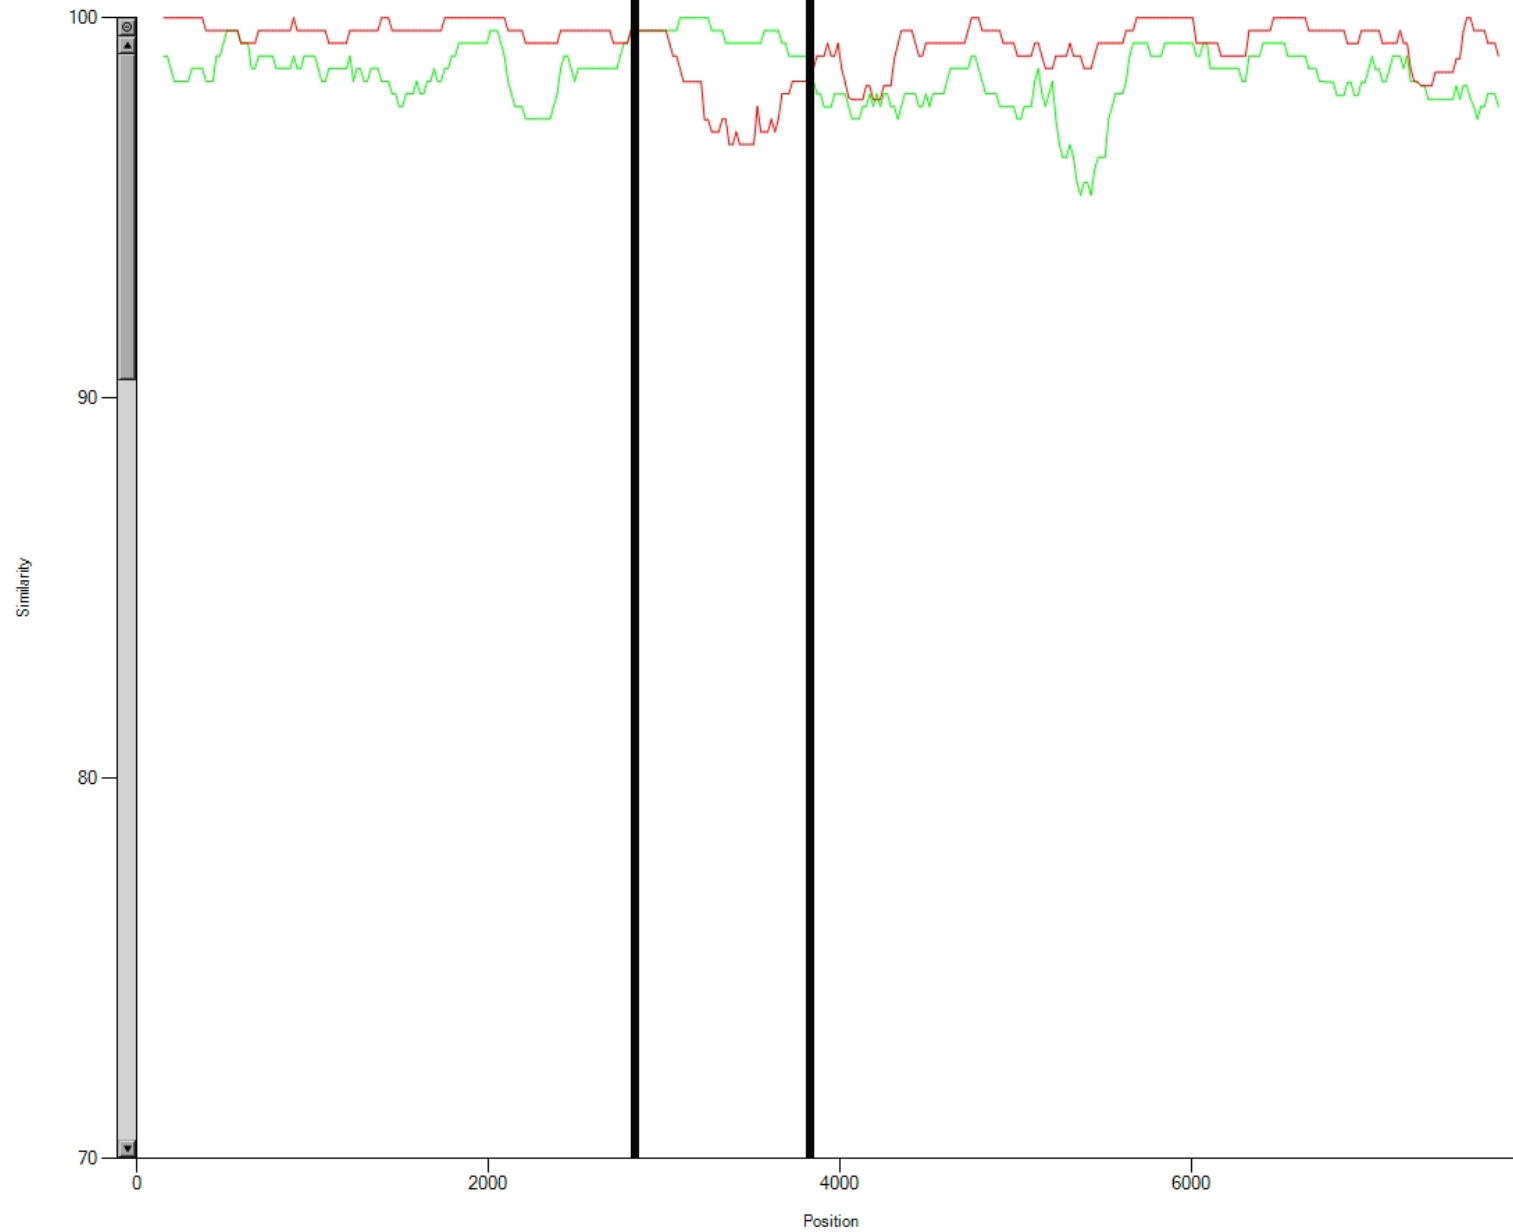

Query sequence (MT316301.1 - D\_recombinant) Sequence size: 7879  
Step: 20 - Window: 300

NC\_001526.4 - A  
AF536180.1 - B  
AF472509.1 - C  
HQ644257.1 - D

Rec. seq 35

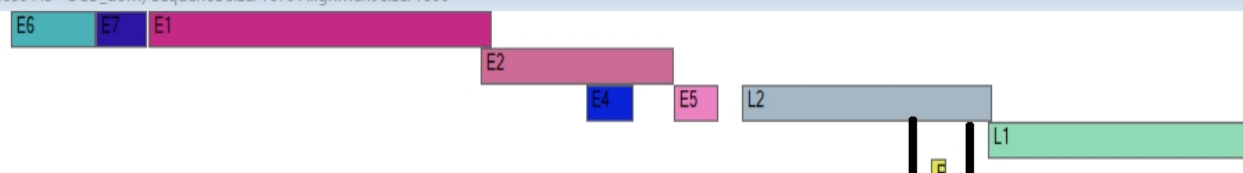

Query sequence (MG850443 - BCD\_dom) Sequence size: 7876 Alignment size: 7906

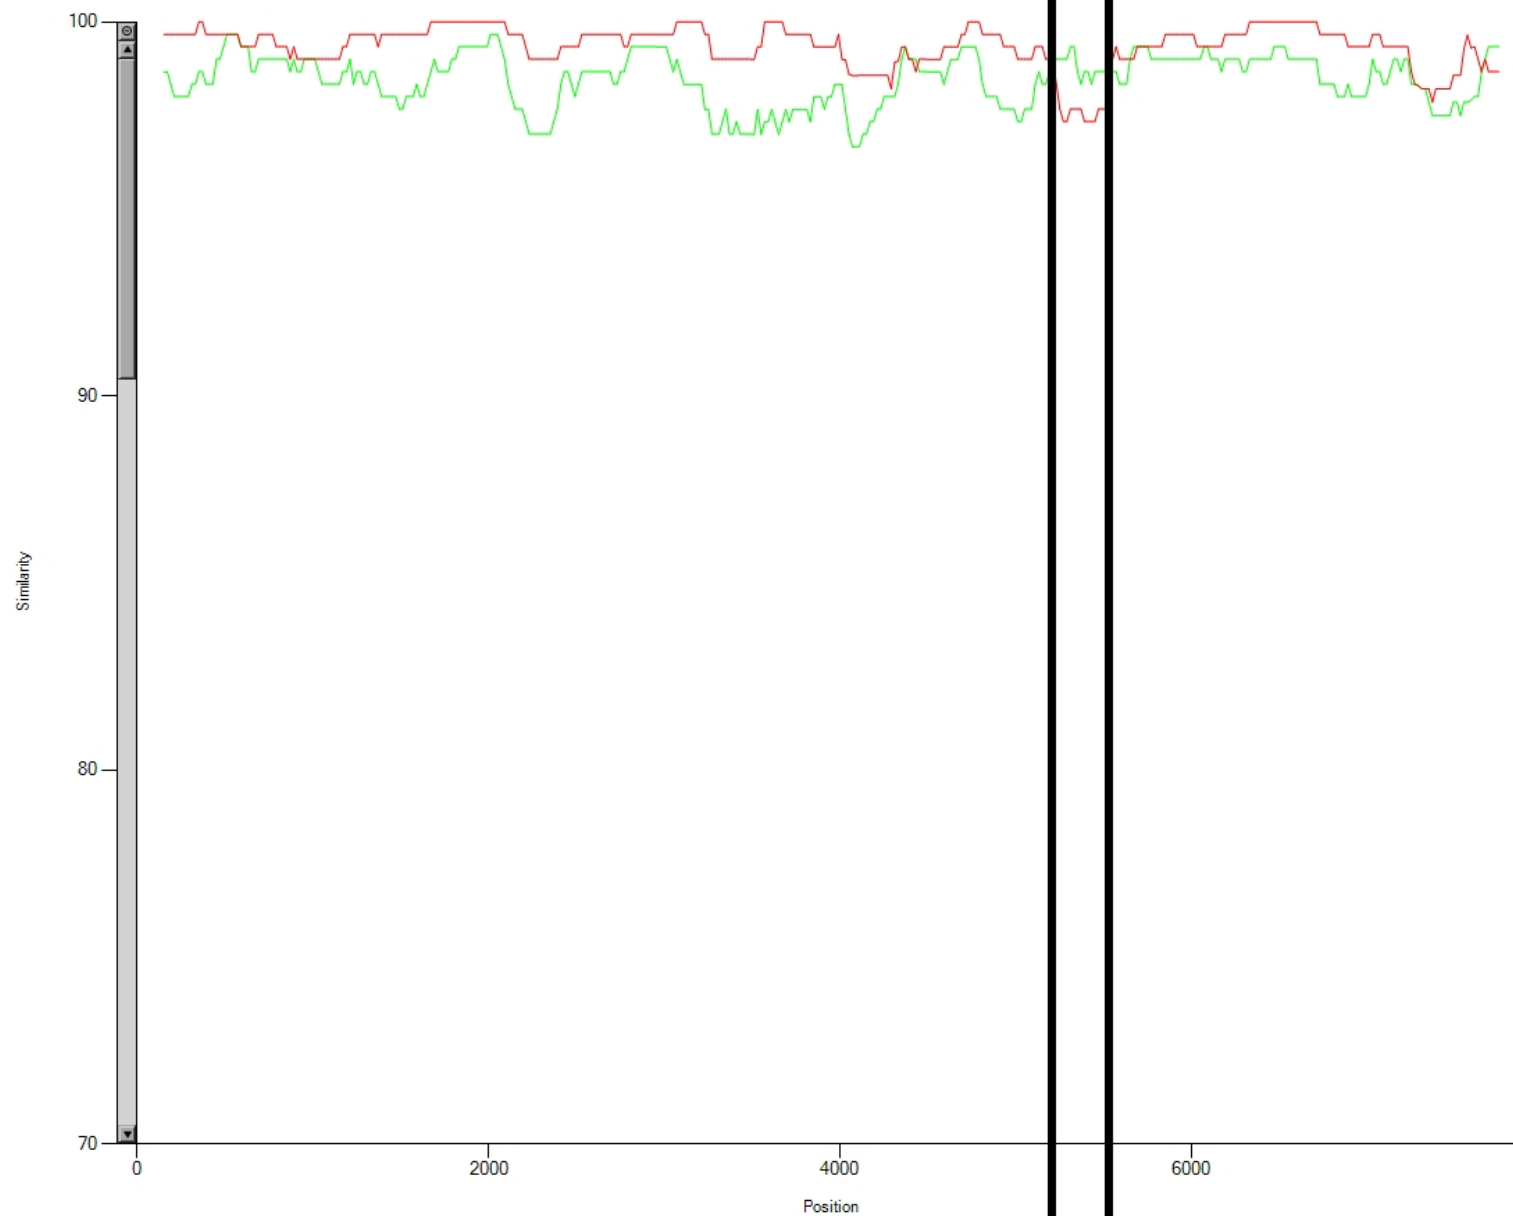

Query sequence (MG850443 - BCD\_dom) Sequence size: 7876  
Step: 20 - Window: 300

- NC\_001526 - A
- HQ644257 - D
- AF536180 - B
- AF472509 - C

Rec. seq 36

E6 E7 E1

E2

E4

E5

L2

L1

Rec

Query sequence (MT316253.1 - D\_recombinant) Sequence size: 7816 Alignment size: 7910

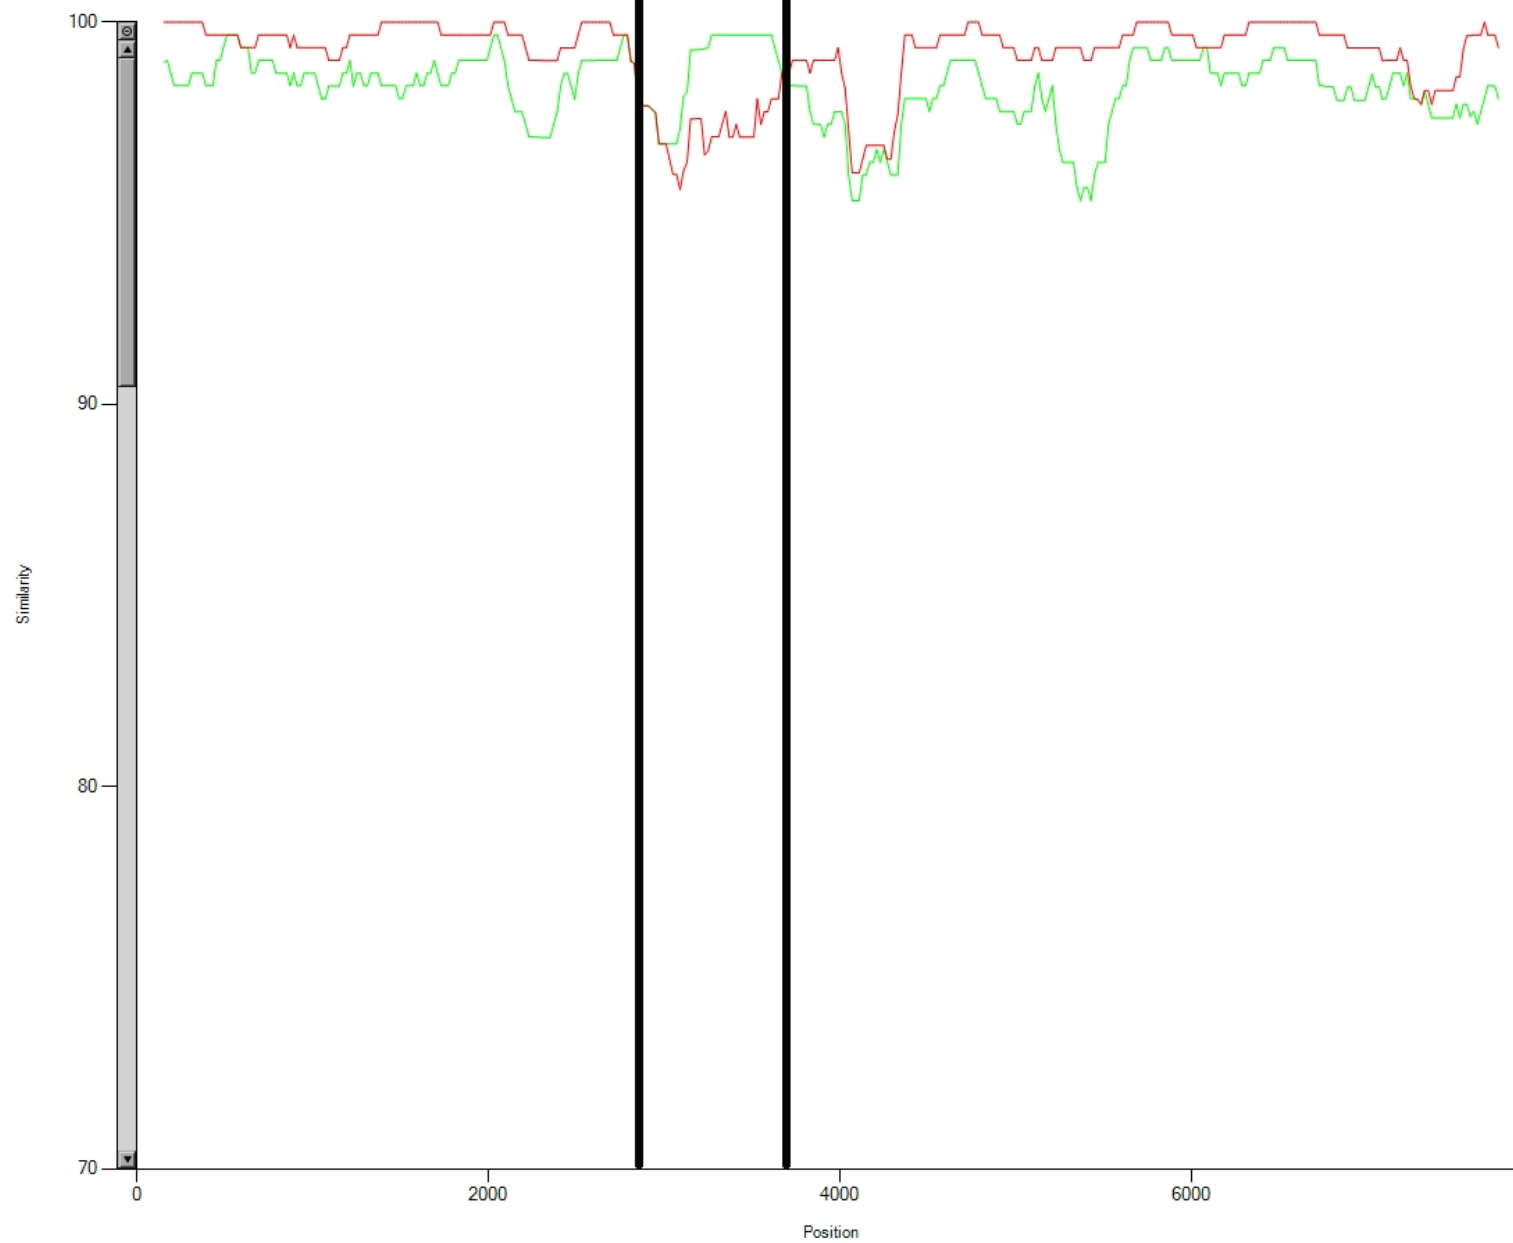

Query sequence (MT316253.1 - D\_recombinant) Sequence size: 7816  
Step: 20 - Window: 300

NC\_001526.4 - A  
AF536180.1 - B  
AF472509.1 - C  
HQ644257.1 - D



Rec. seq 37

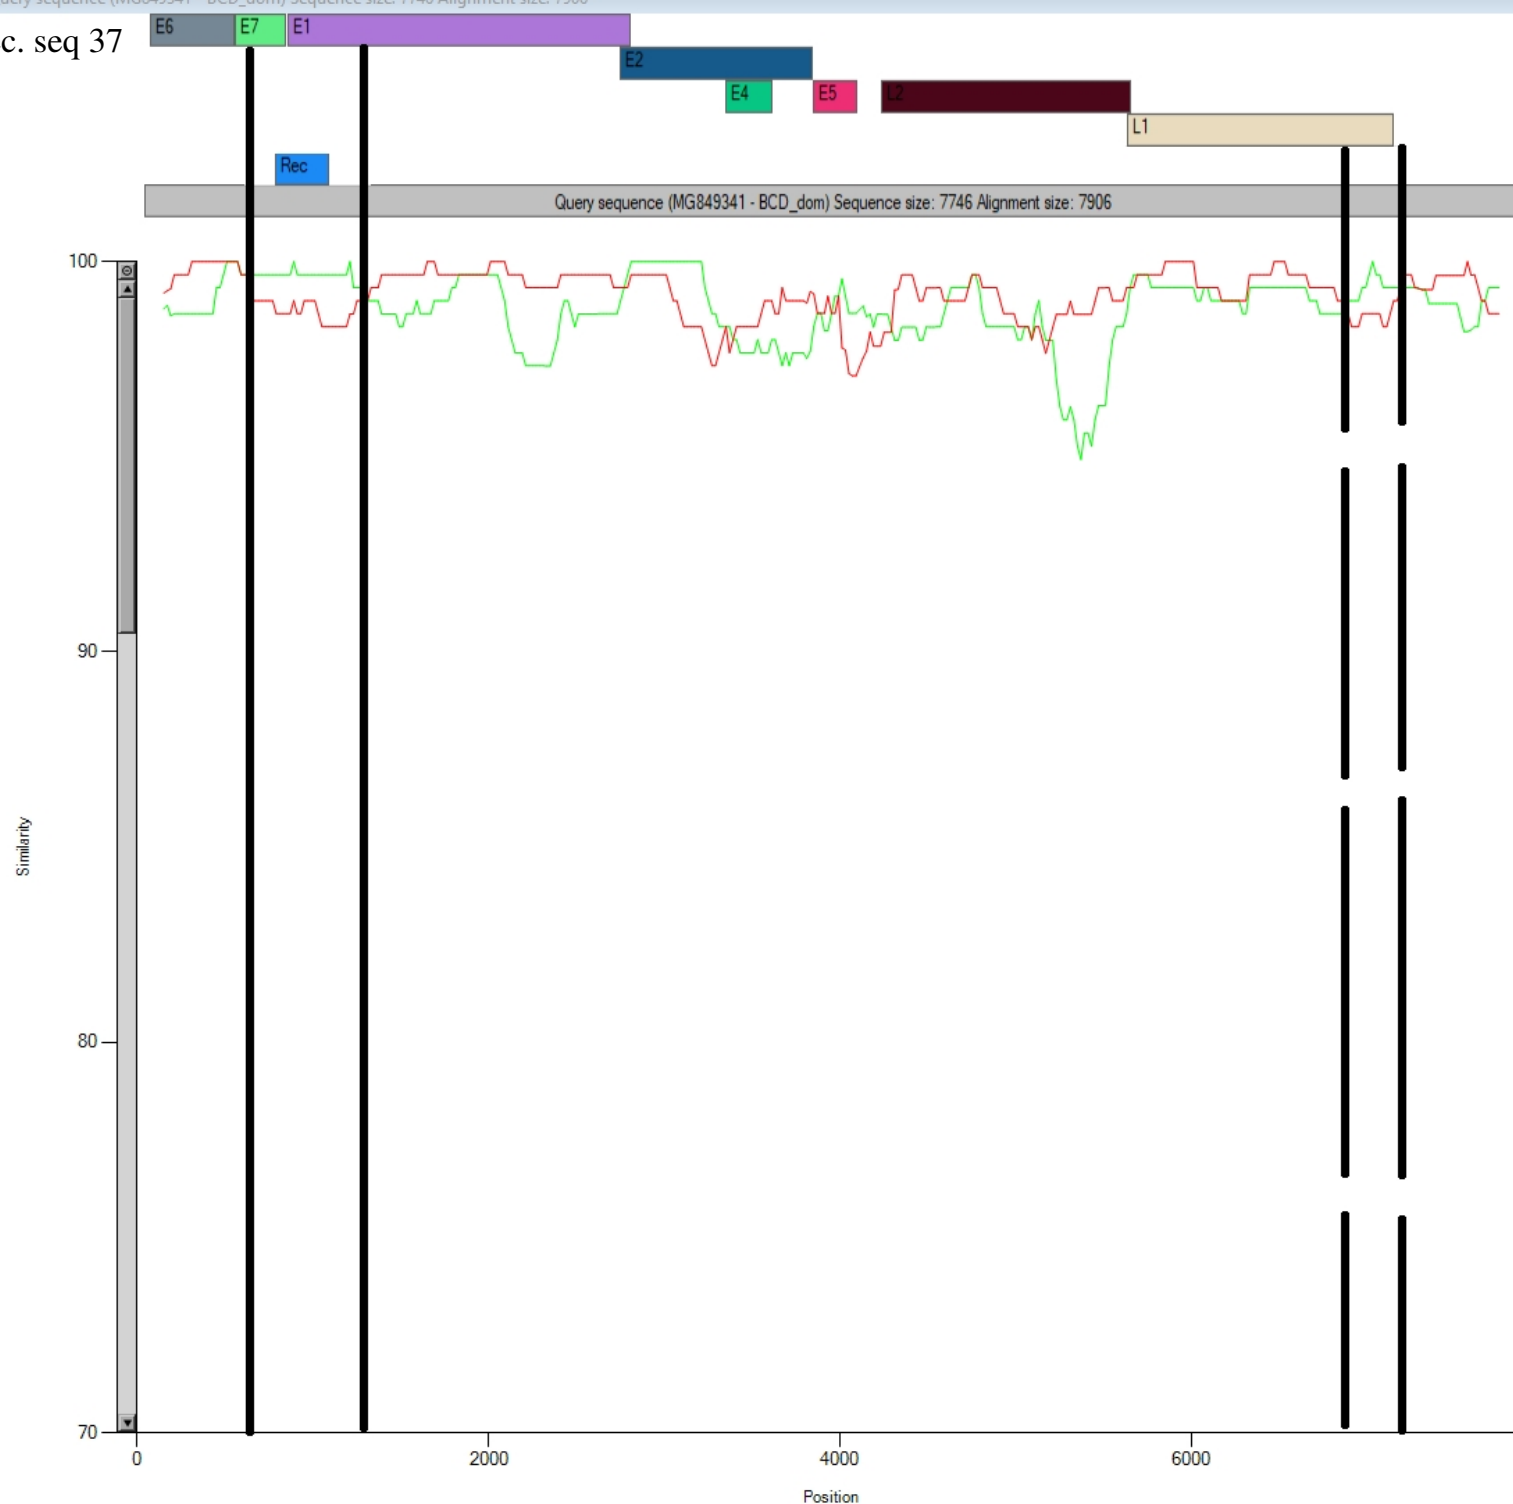

Query sequence (MG849341 - BCD\_dom) Sequence size: 7746  
Step: 20 - Window: 300

NC\_001526 - A  
AF536180 - B  
AF472509 - C  
HQ644257 - D

Dotted lines represent the lower confidence  
recombination crossover sites  
(recombination events supported by 2 or  
less lineage specific SNPs)

Rec. seq 38

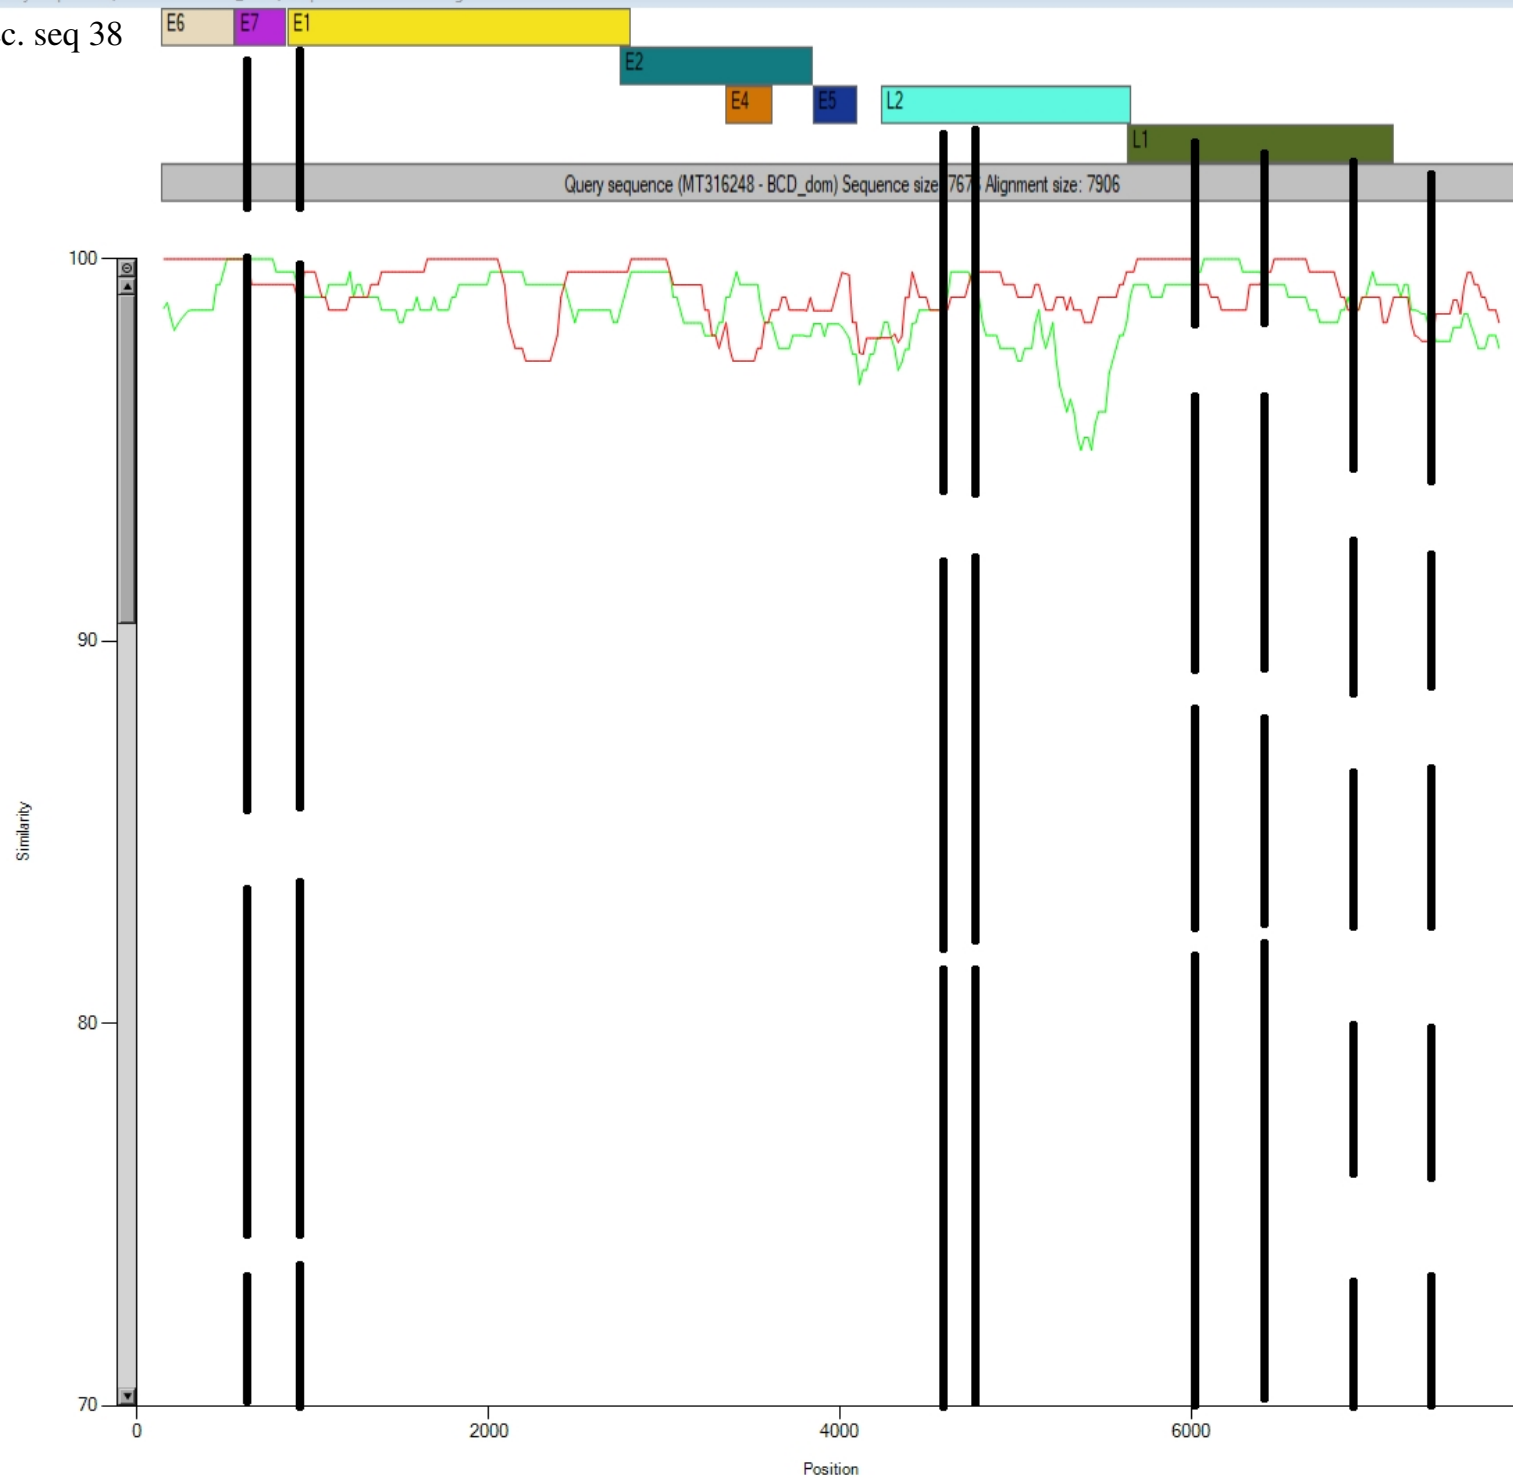

NC\_001526 - A  
AF536180 - B  
AF472509 - C  
HQ644257 - D

Dotted lines represent the lower confidence recombination crossover sites (recombination events supported by 2 or less lineage specific SNPs)

Rec. seq 39

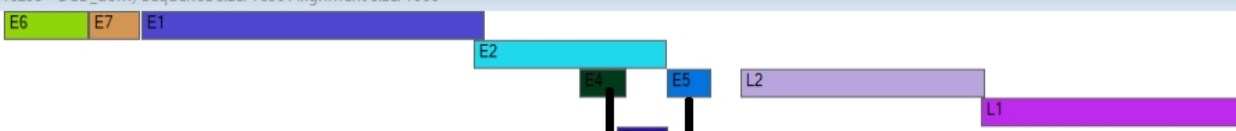

Query sequence (MT316293 - BCD\_dom) Sequence size: 7656 Alignment size: 7906

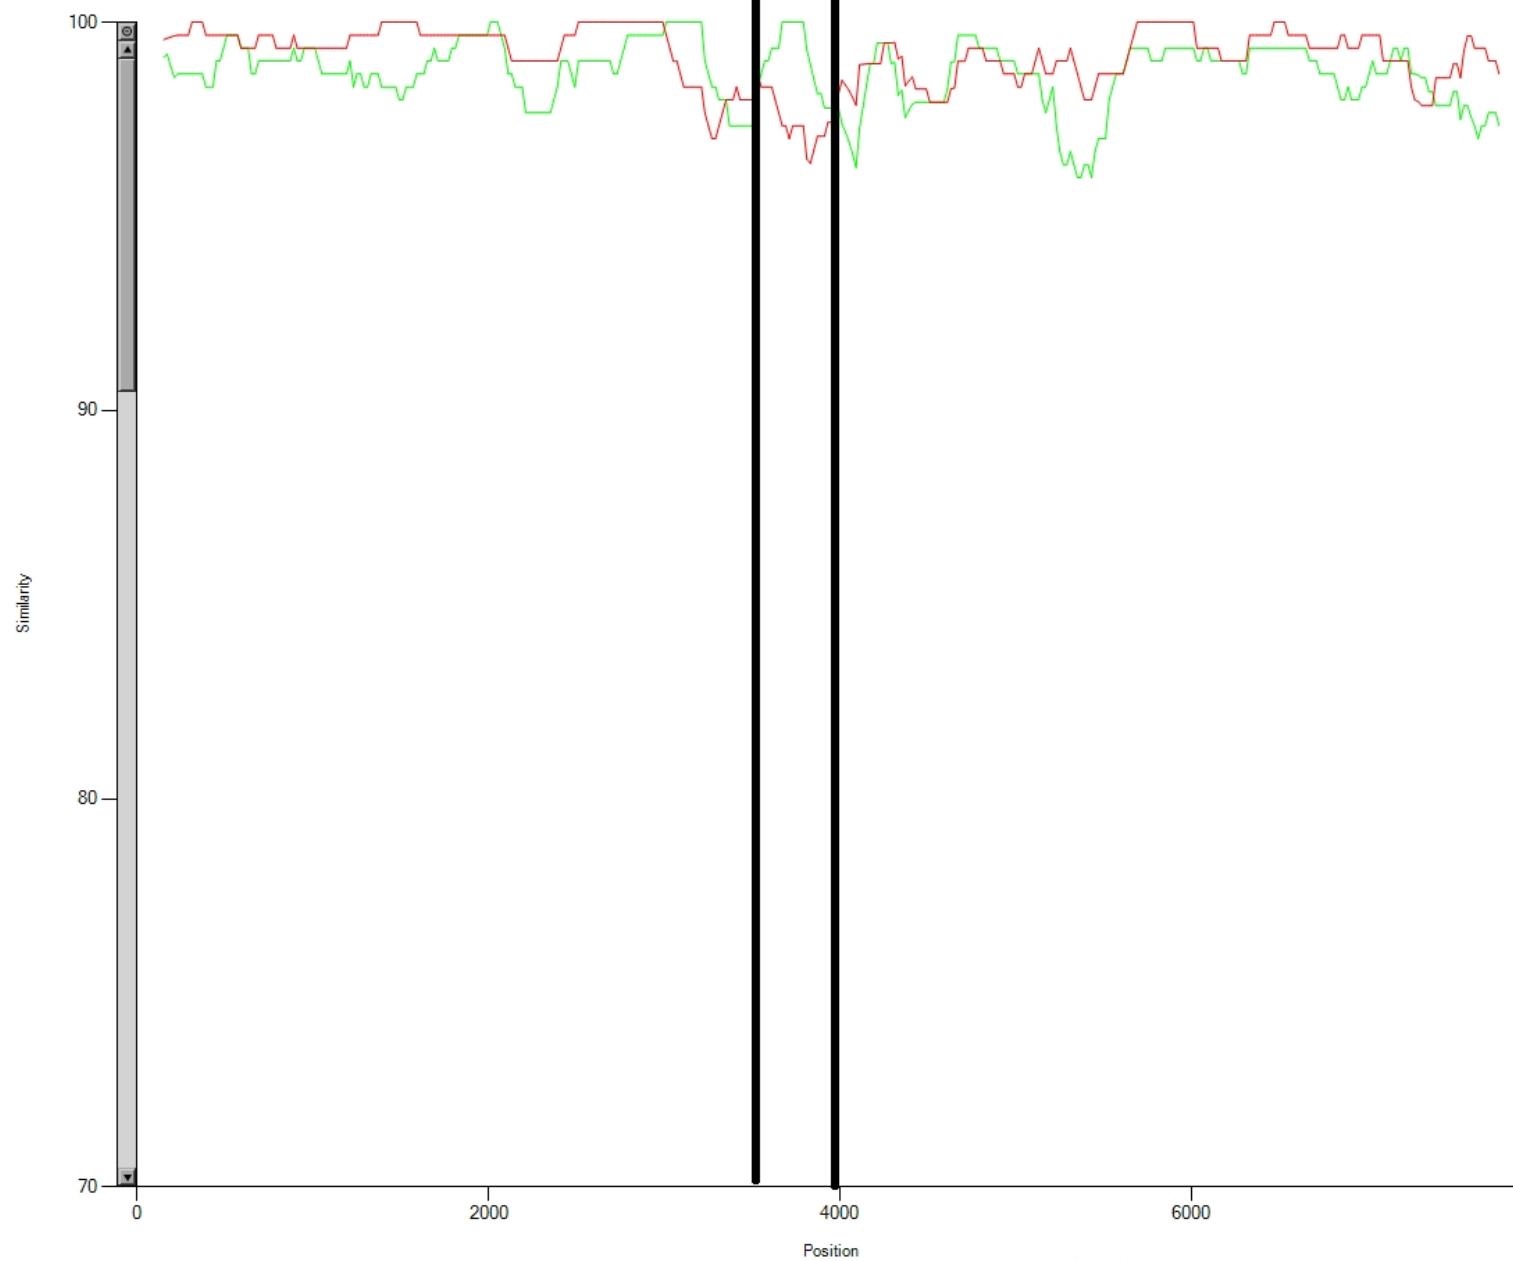

Query sequence (MT316293 - BCD\_dom) Sequence size: 7656 Alignment size: 7906  
Step: 20 - Window: 300

Rec. seq 40

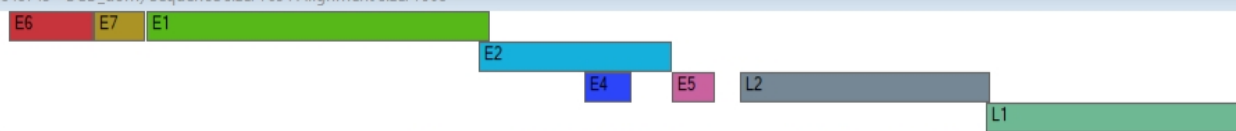

Query sequence (MG848743 - BCD\_dom) Sequence size: 7654 Alignment size: 7908

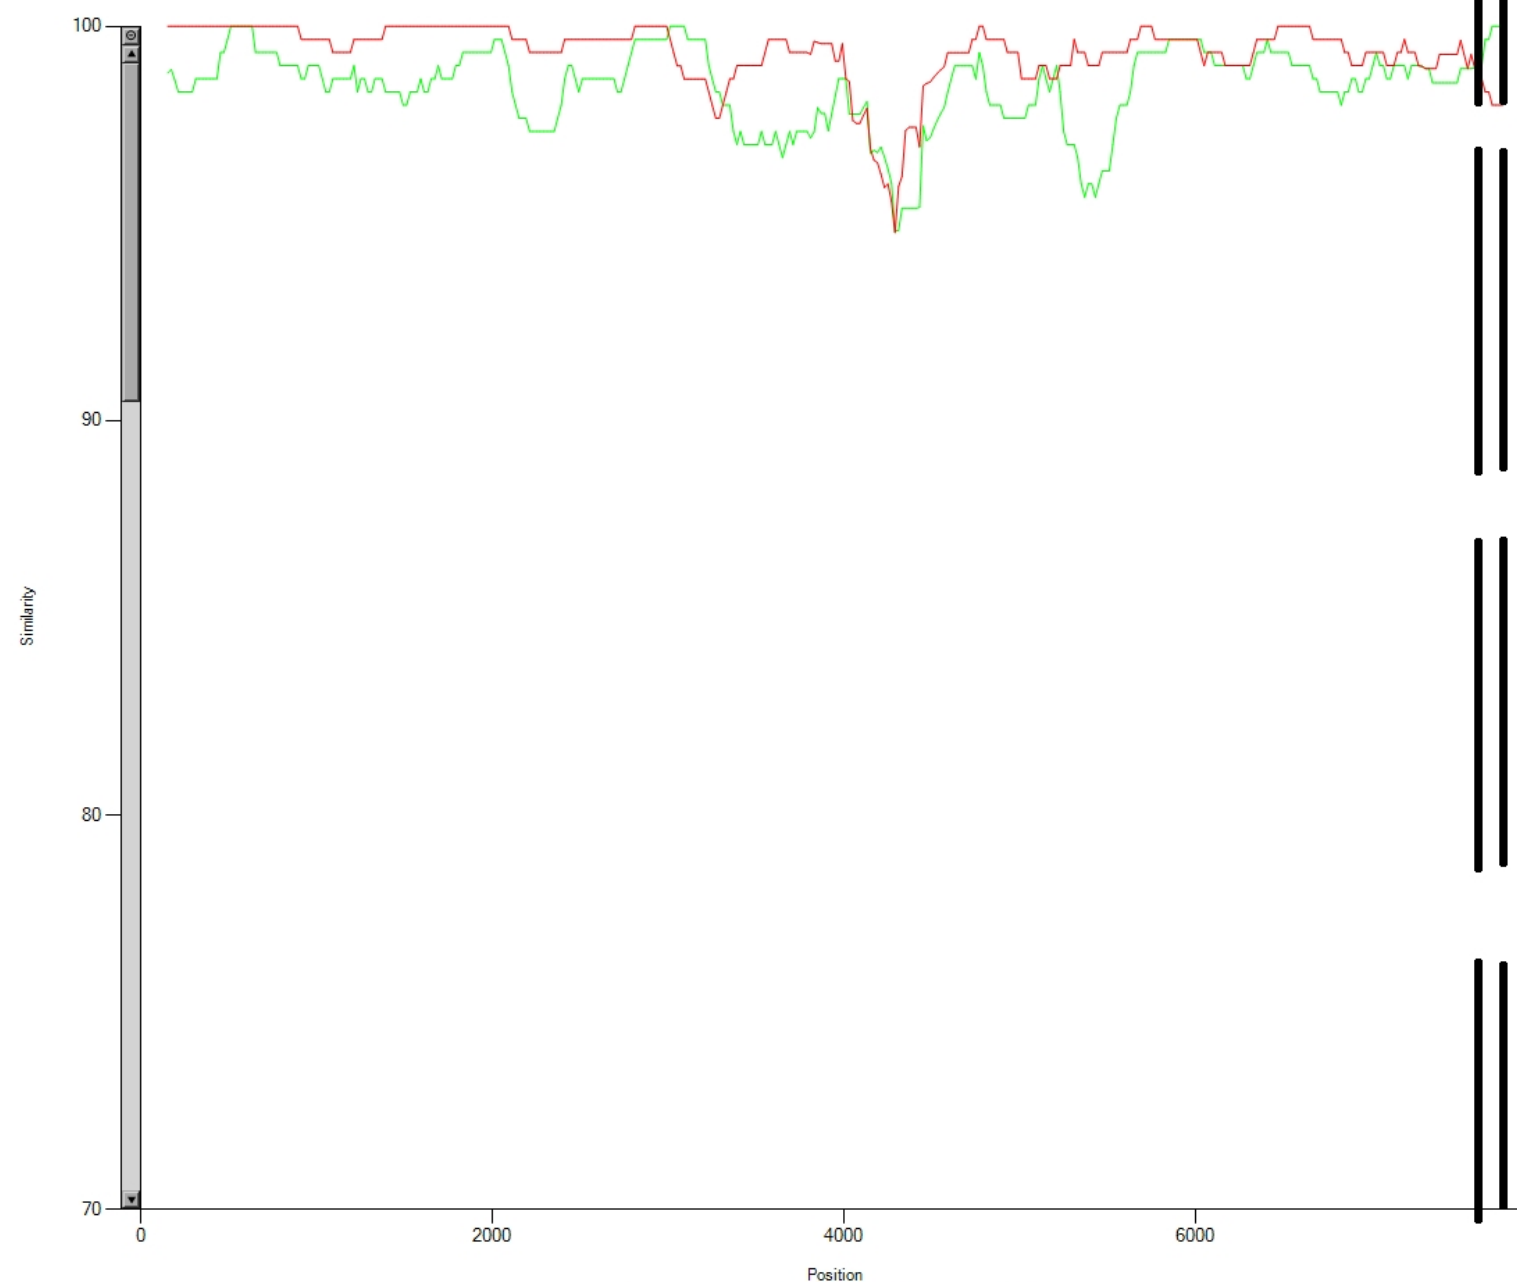

Query sequence (MG848743 - BCD\_dom) Sequence size: 7654  
Step: 20 - Window: 300

- NC\_001526 - A
- AF536180 - B
- AF472509 - C
- HQ644257 - D

Dotted lines represent the lower confidence recombination crossover sites (recombination events supported by 2 or less lineage specific SNPs)

E6 E7 E1

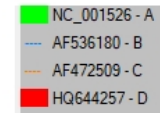

Query sequence (MT316232 - BCD\_dom) Sequence size: 7519  
Step: 20 - Window: 300

Rec. seq 42

Similarity

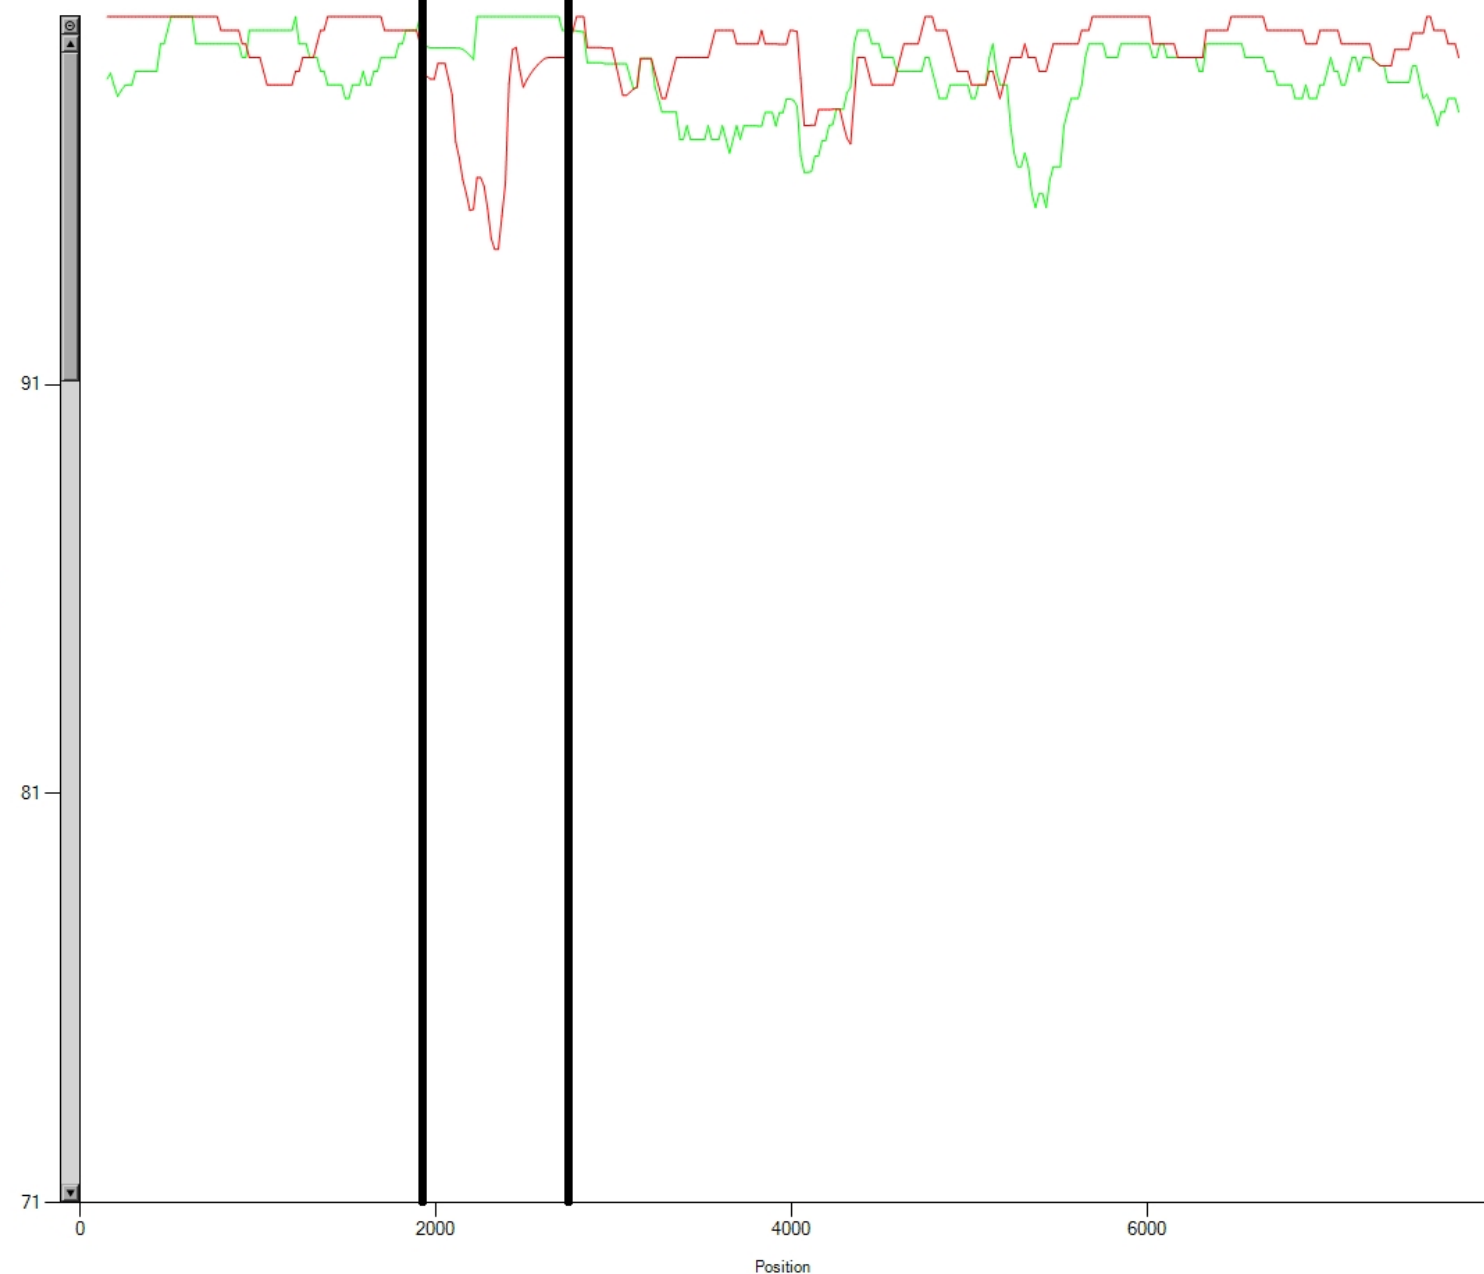

Query sequence (MT316218 - BCD\_dom) Sequence size: 7459  
Step: 20 - Window: 300

- NC\_001526 - A
- HQ644257 - D
- AF472509 - C
- AF536180 - B

Rec. seq 43

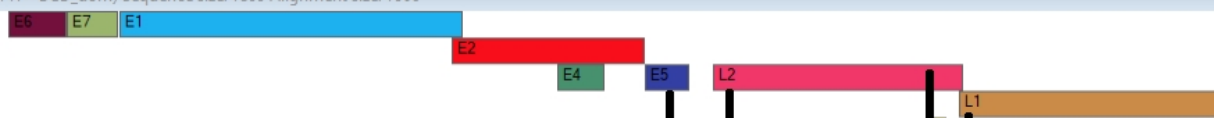

Query sequence (MG849717 - BCD\_dom) Sequence size: 7399 Alignment size: 7906

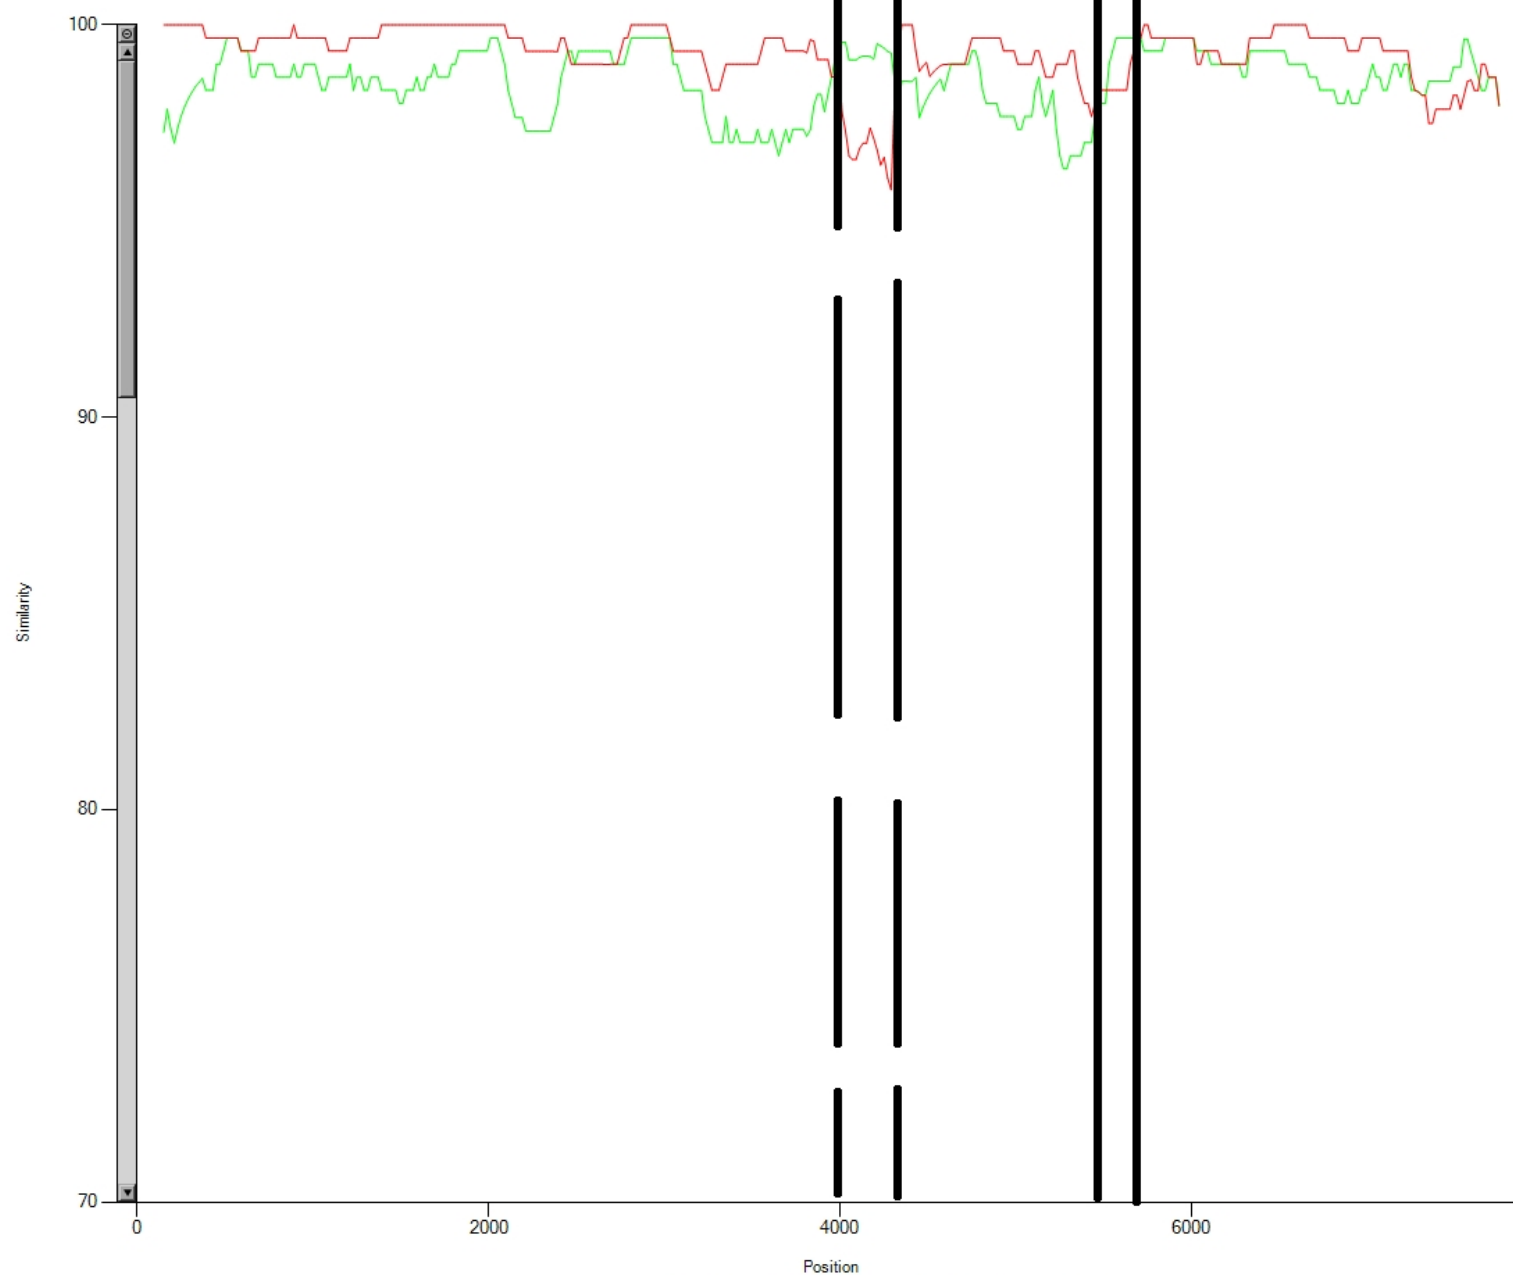

Query sequence (MG849717 - BCD\_dom) Sequence size: 7399 Alignment size: 7906  
Step: 20 - Window: 300

NC\_001526 - A  
HQ644257 - D  
AF536180 - B  
AF472509 - C

Dotted lines represent the lower confidence  
recombination crossover sites  
(recombination events supported by 2 or  
less lineage specific SNPs)

Rec. seq 44

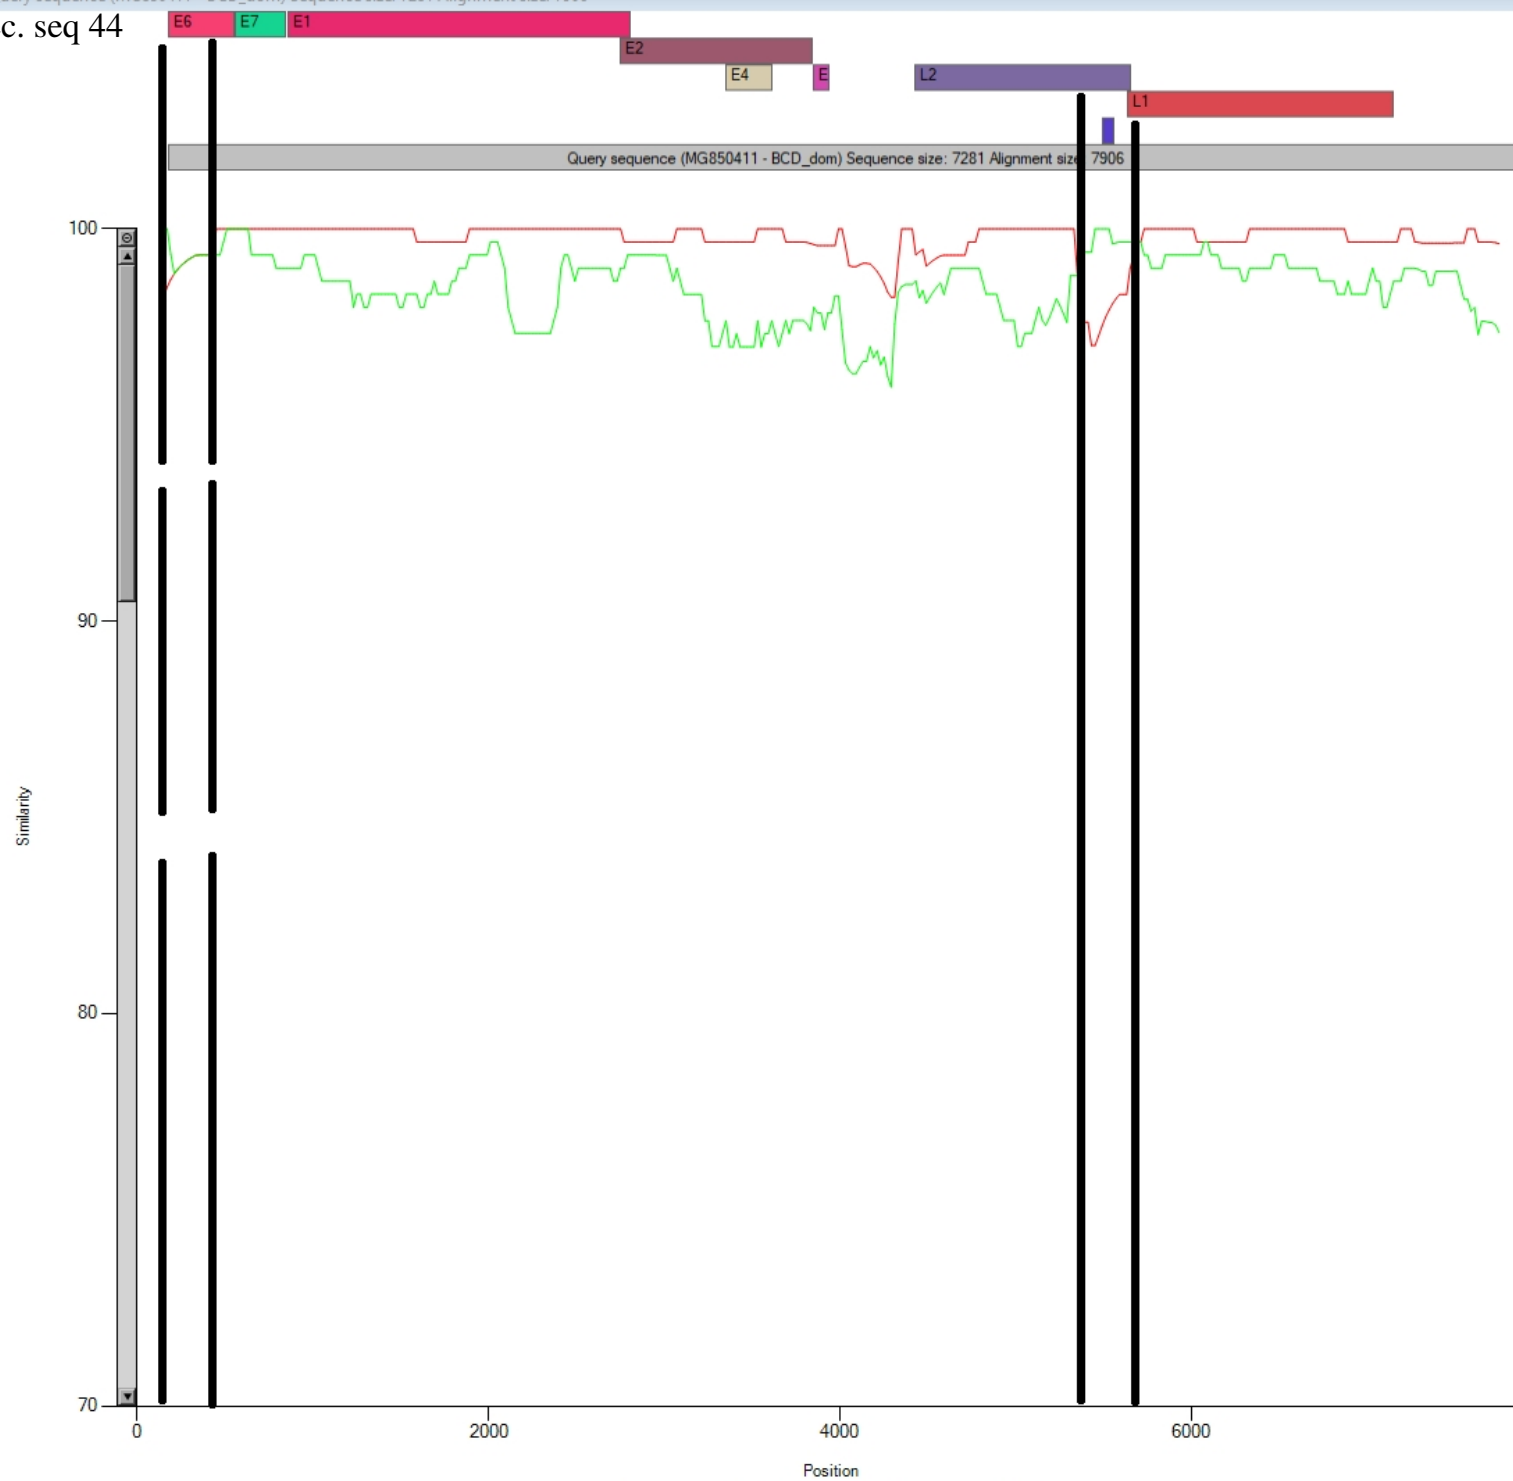



Rec. seq 45

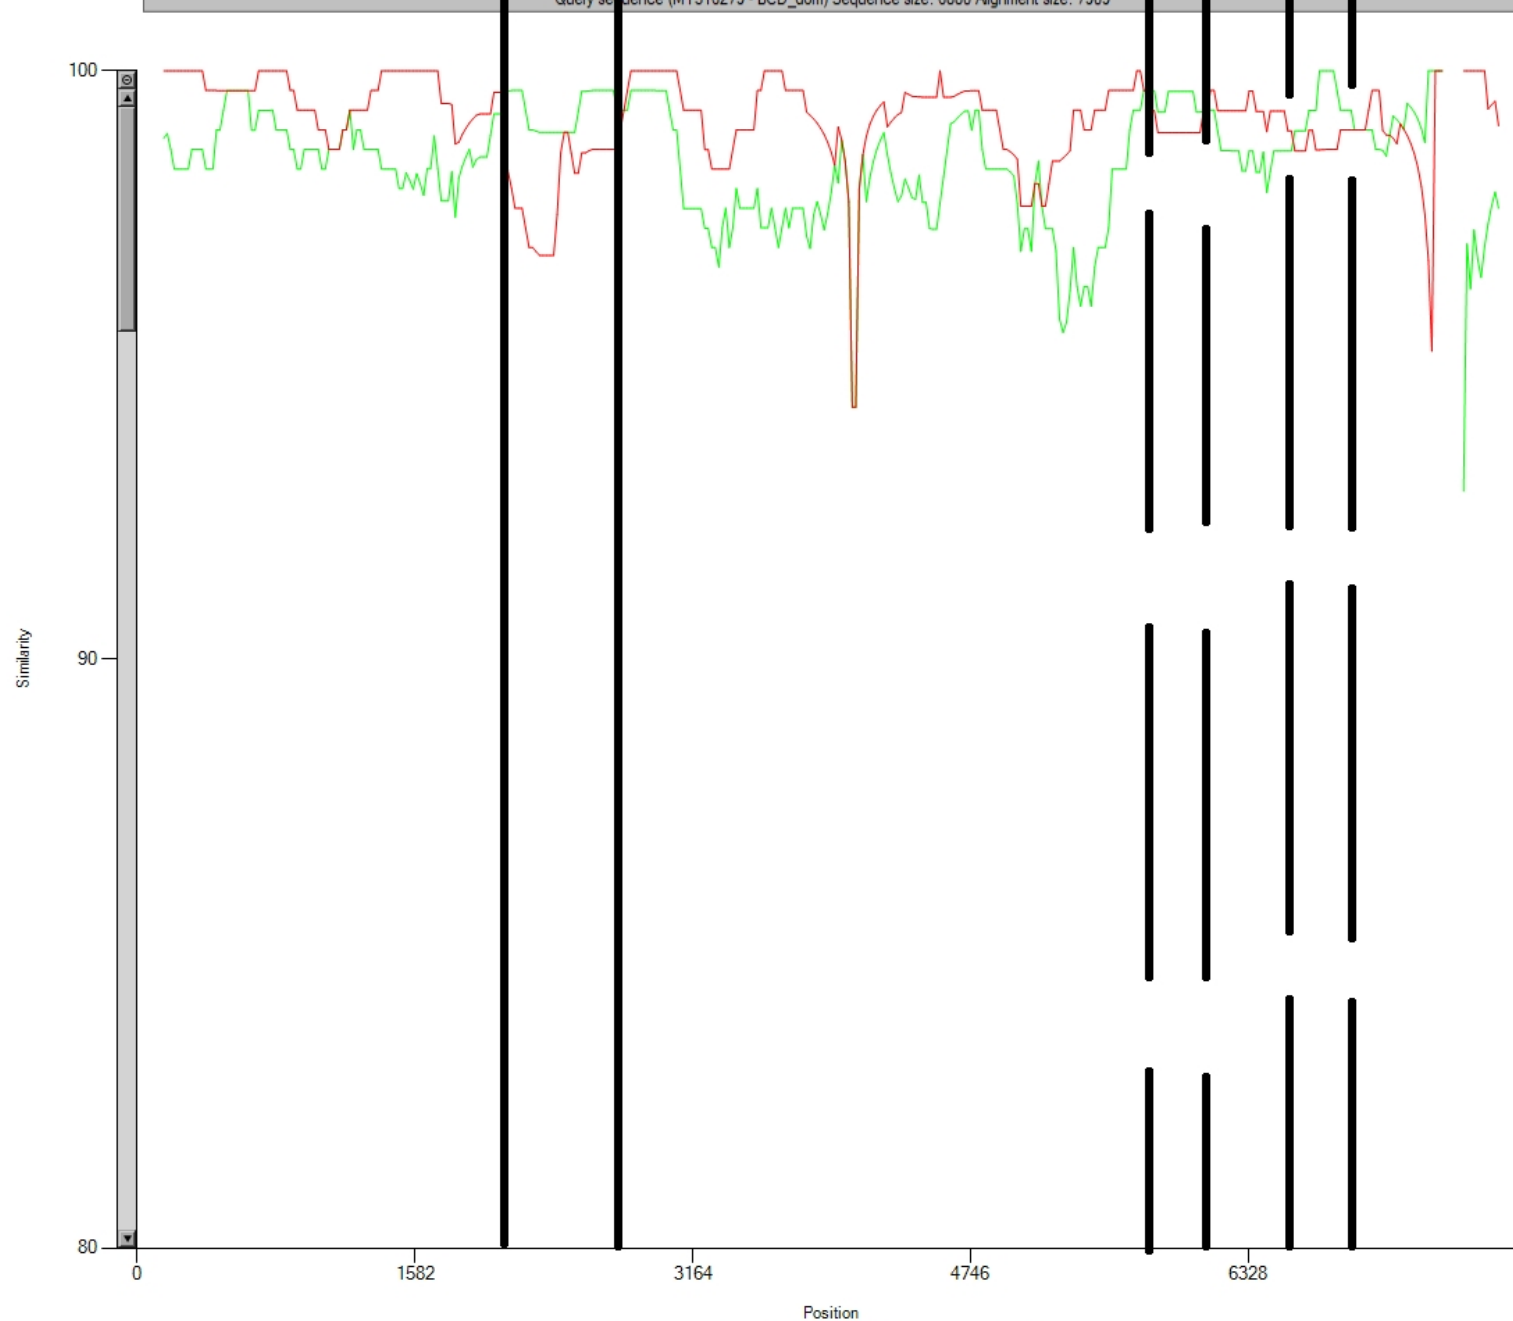

NC\_001526 - A  
HQ644257 - D  
AF536180 - B  
AF472509 - C

Dotted lines represent the lower confidence recombination crossover sites (recombination events supported by 2 or less lineage specific SNPs)
