# Supplementary material
Source: MDPI journal article supplement (https://www.mdpi.com/1424-2818/13/10/497)

# Supplementary File S1

## PhyML trees of HPV-16 genomic regions

PhyML trees were computed with GTR+I+G model, aLRT, SPR on nucleotide alignments

Lineage color code:

-  Group A (European lineage A)
-  Group B (African lineage 1 B)
-  Group C (African lineage 2 C)
-  Group D (American lineage D)
-  Ungrouped

| Recombinants                                                                                 | Inferred breakpoints |
|----------------------------------------------------------------------------------------------|----------------------|
|  MT316214   | 967-3203             |
|  KU641509   | 2191-2469            |
|  MT316301   | 2759-3815            |
|  MT316253 | 3027-3604            |
|  KY549190 | 2501-4871;5170-6218  |

LCR

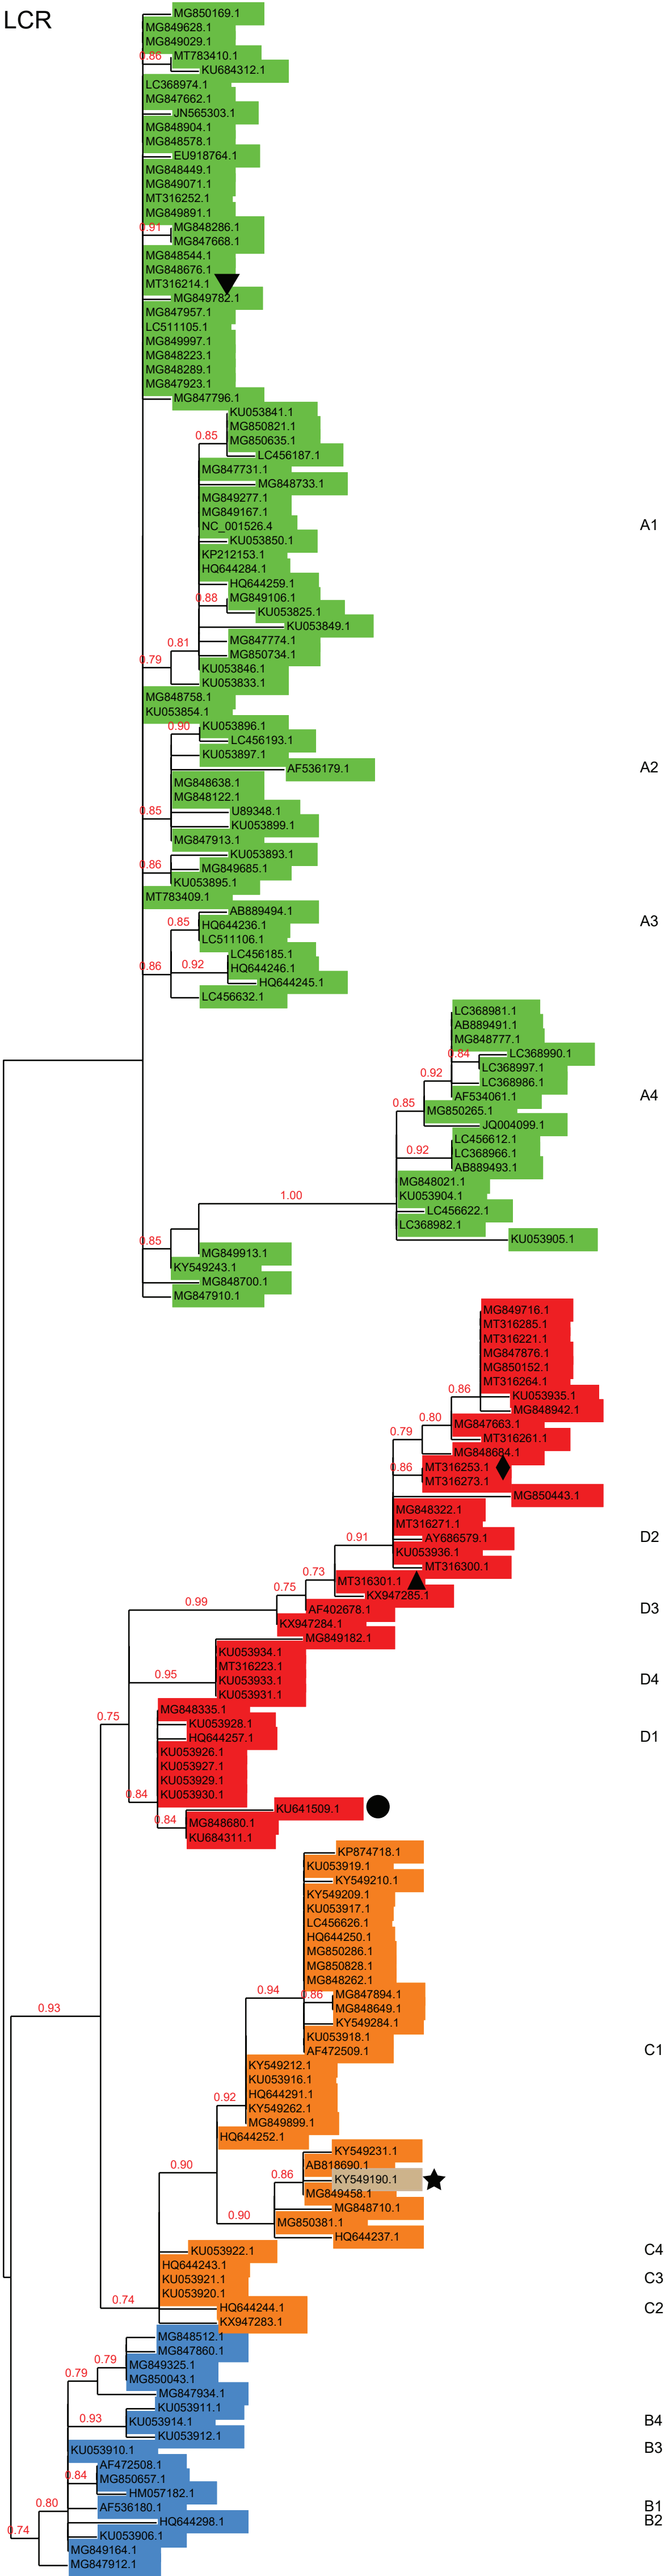

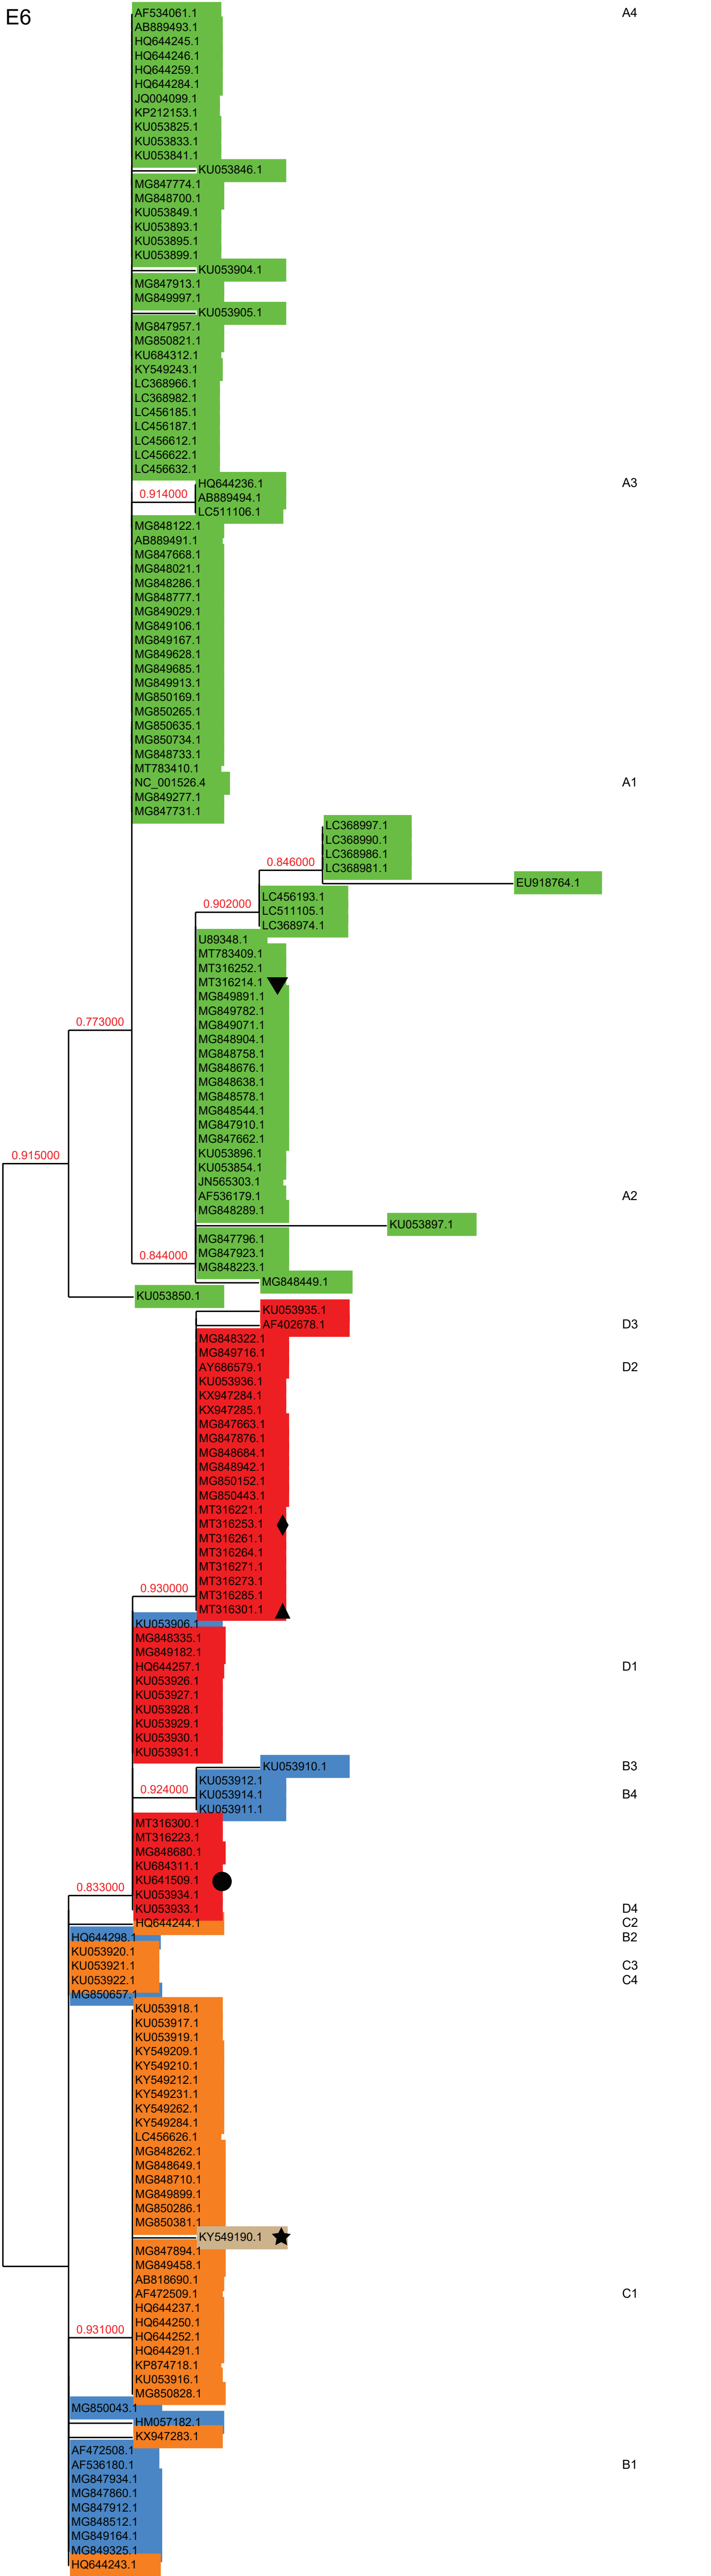

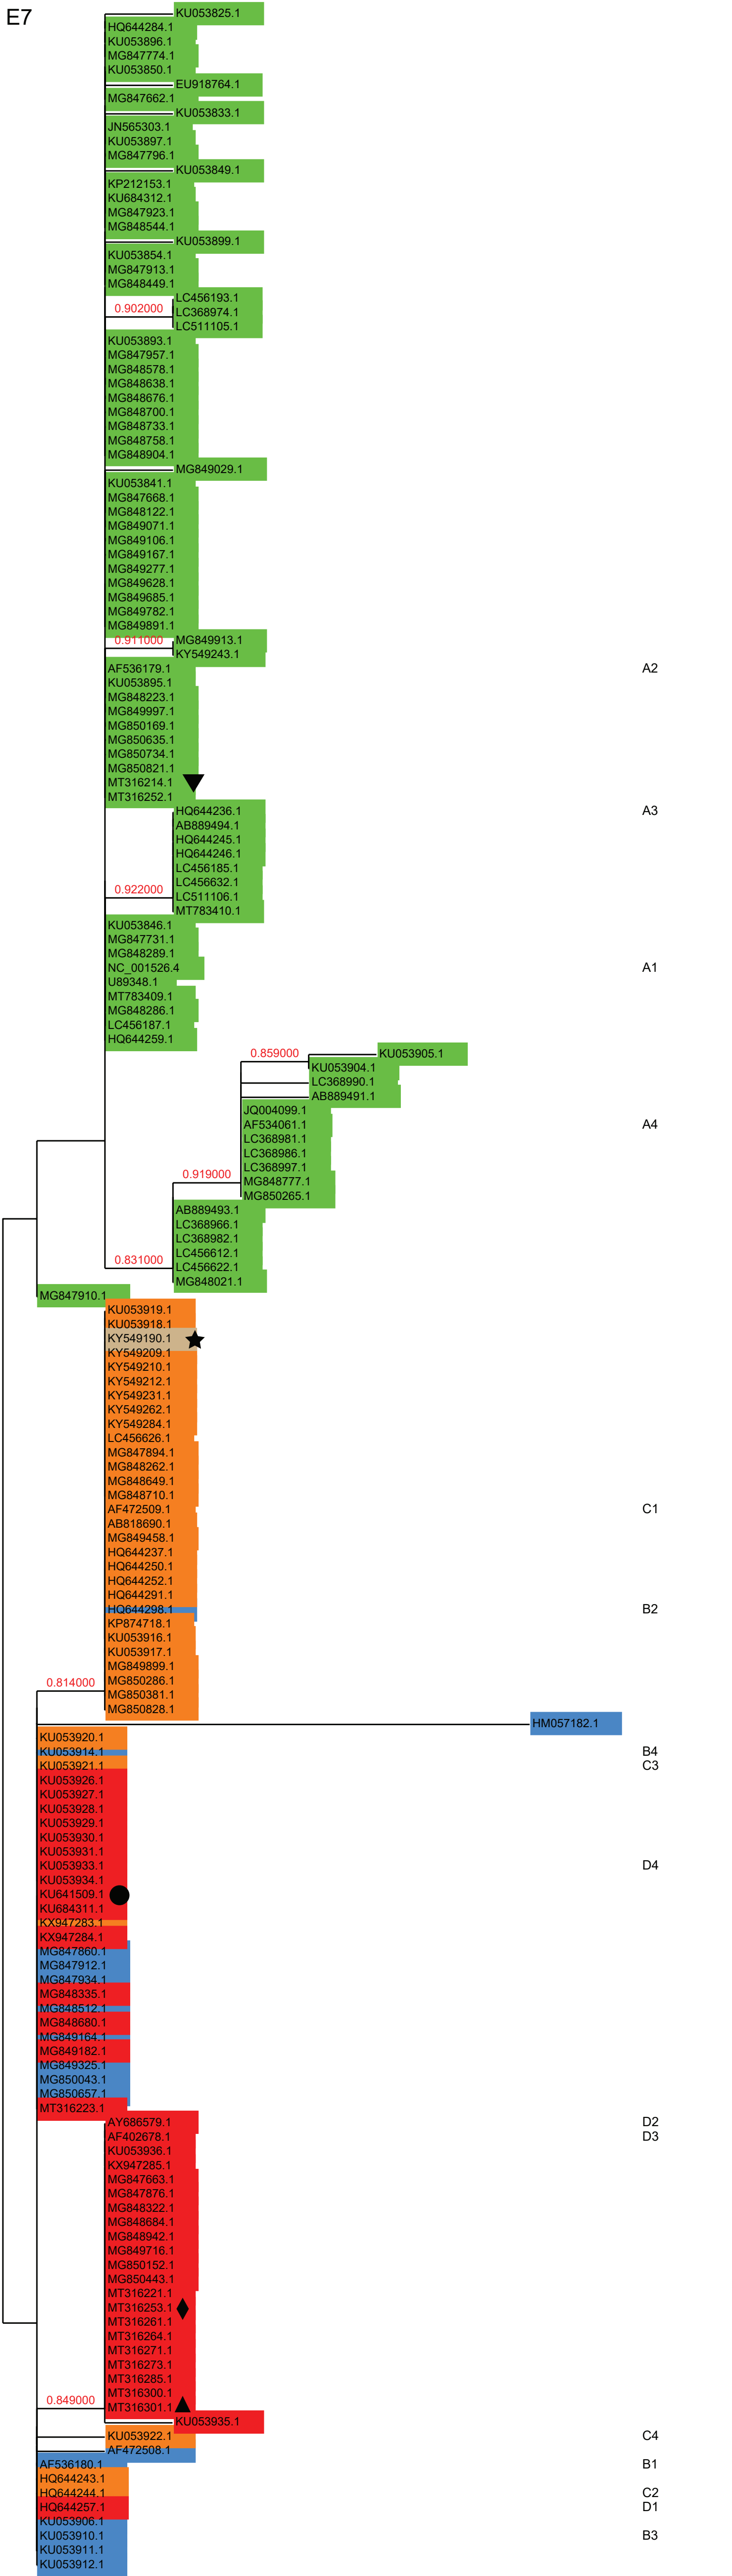

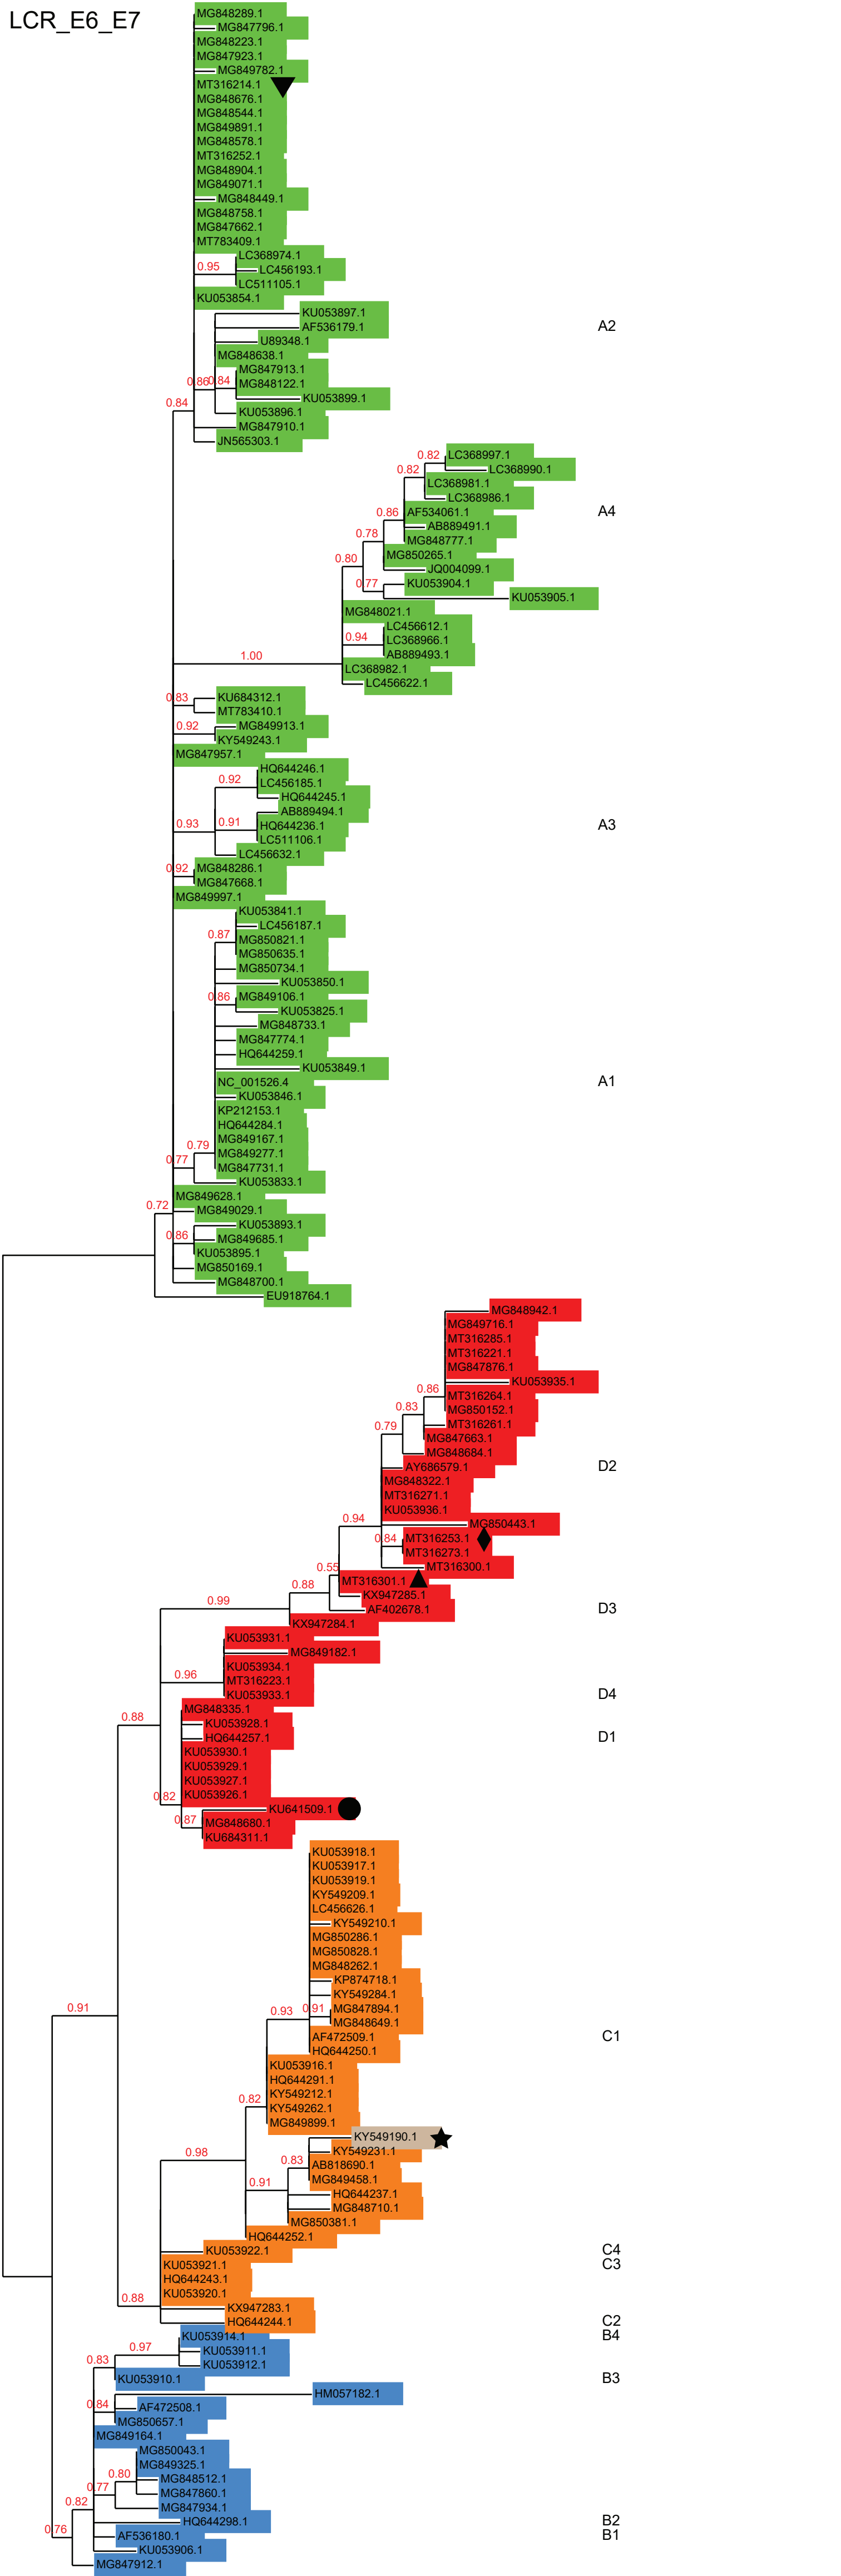

E6 E7

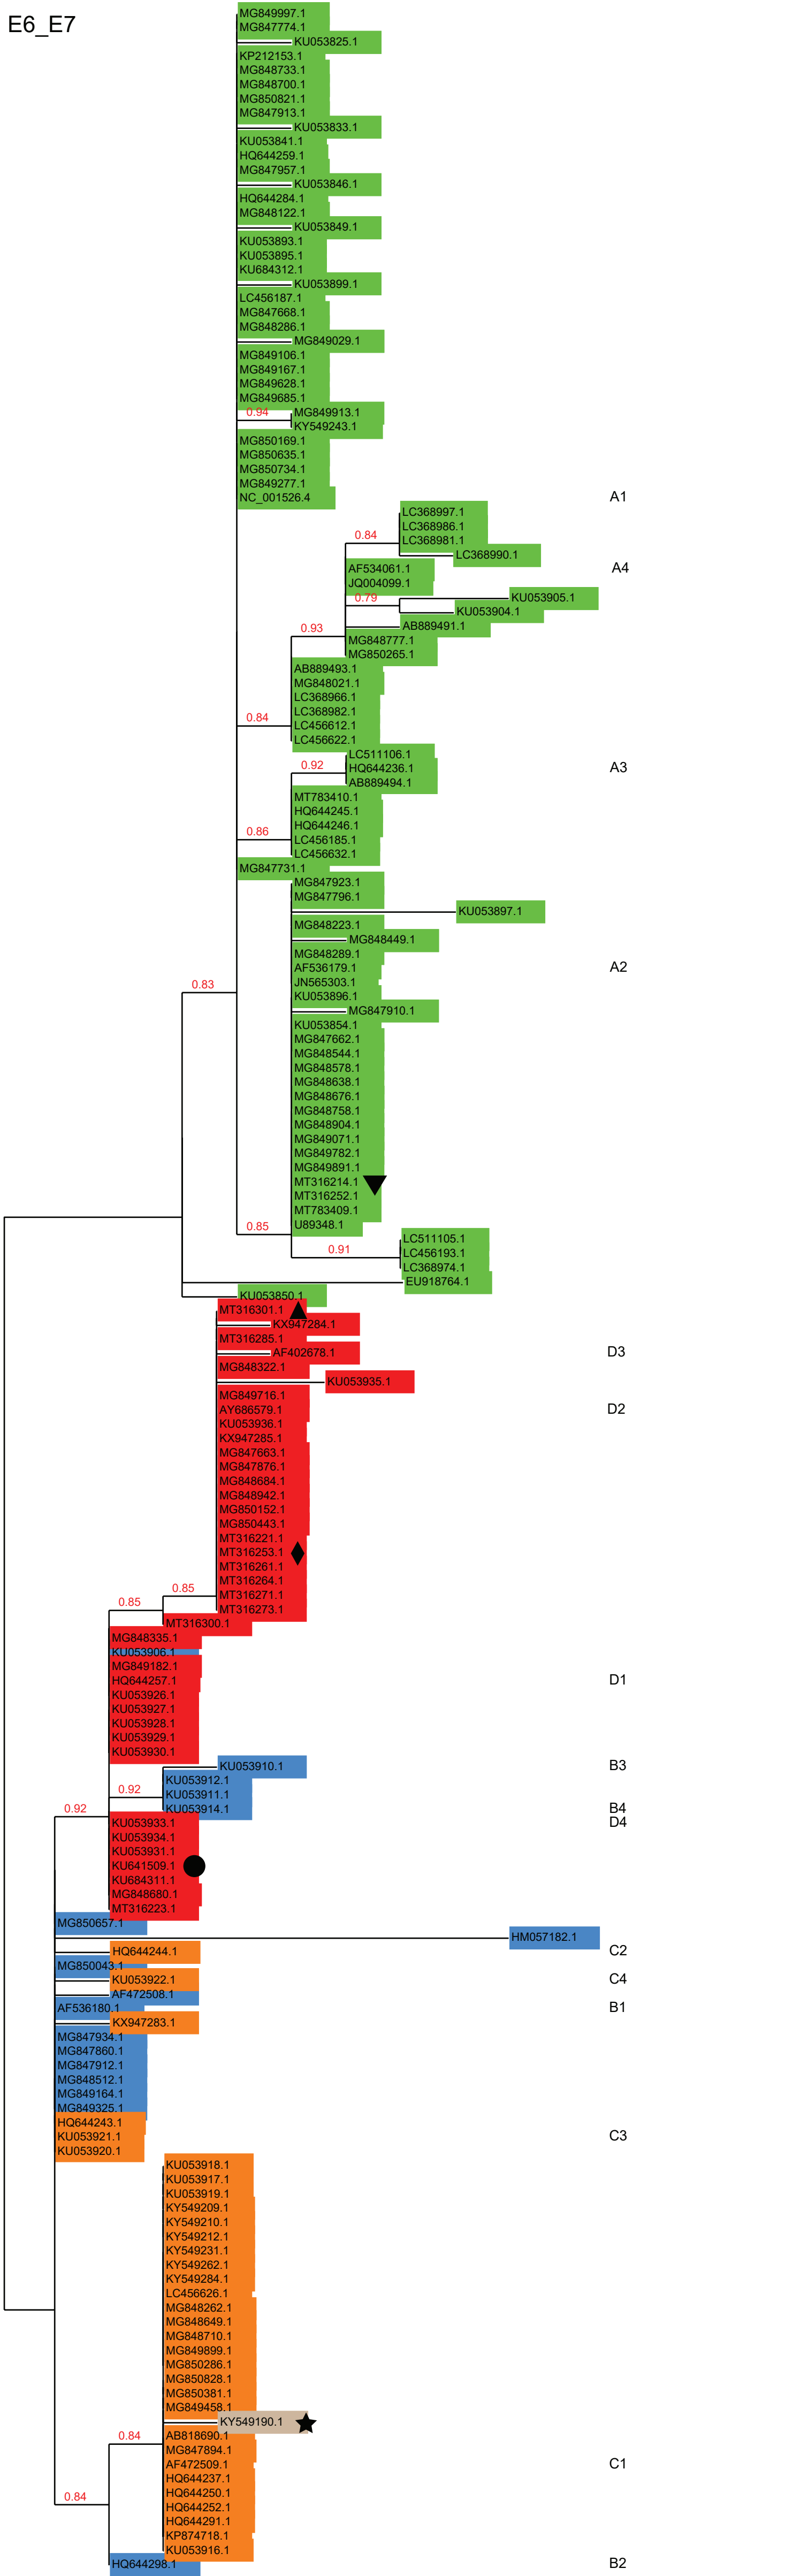



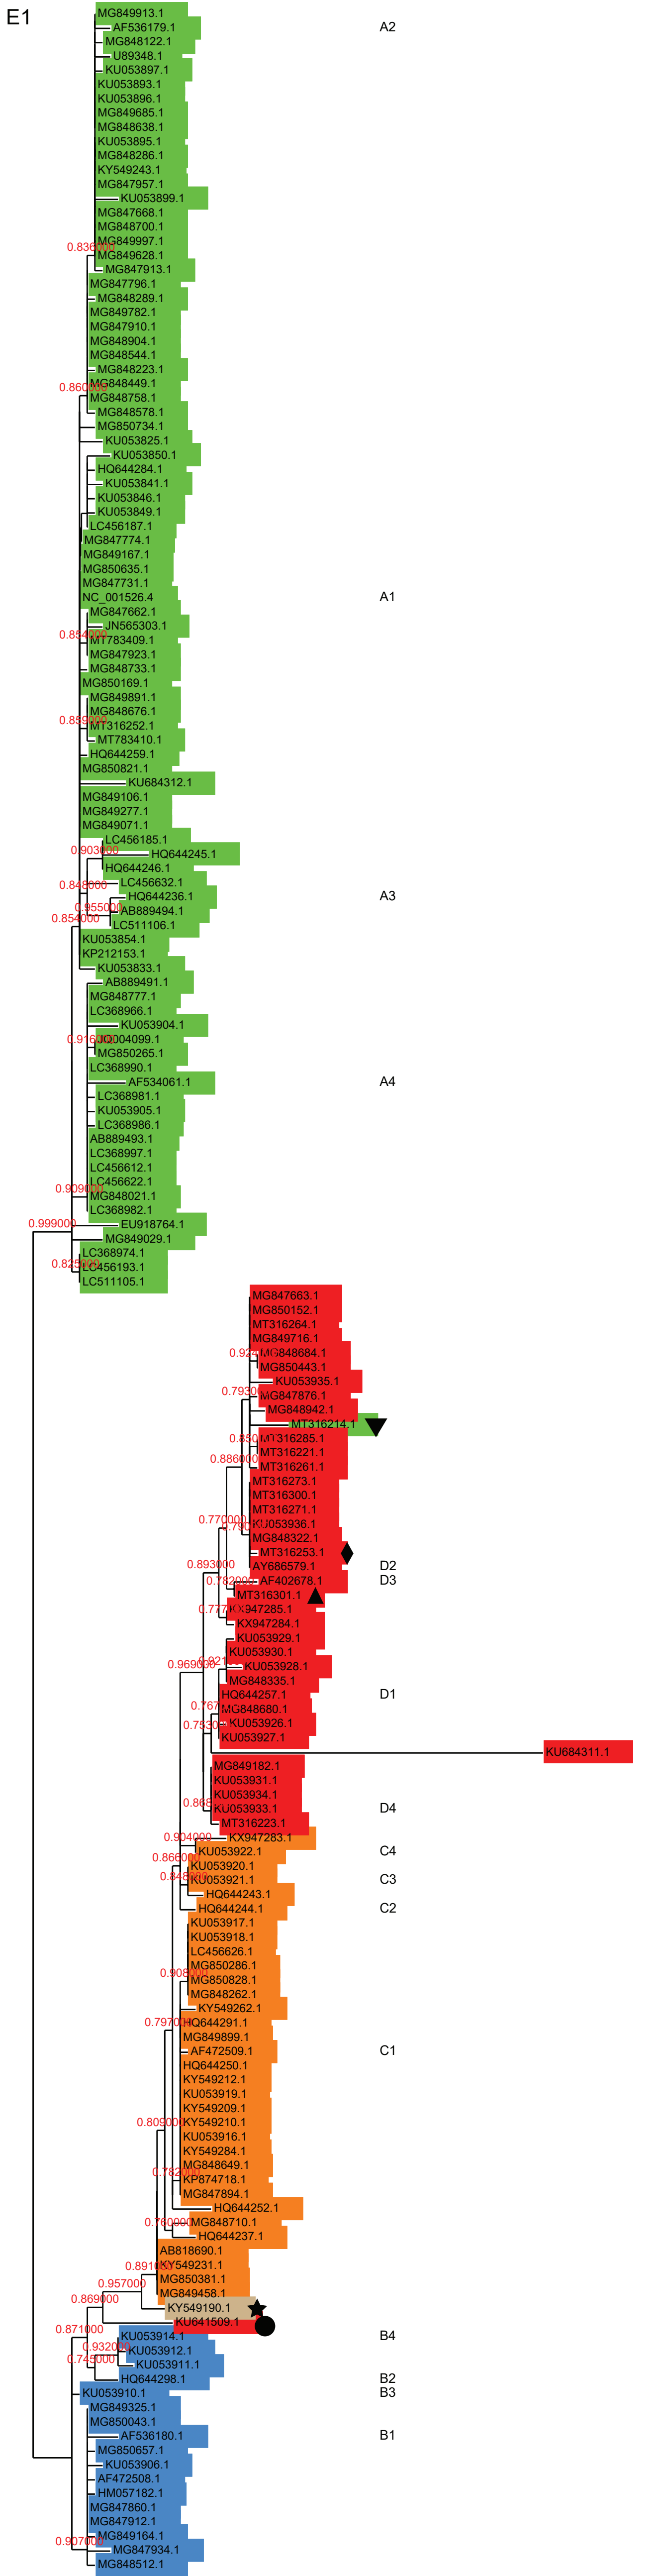

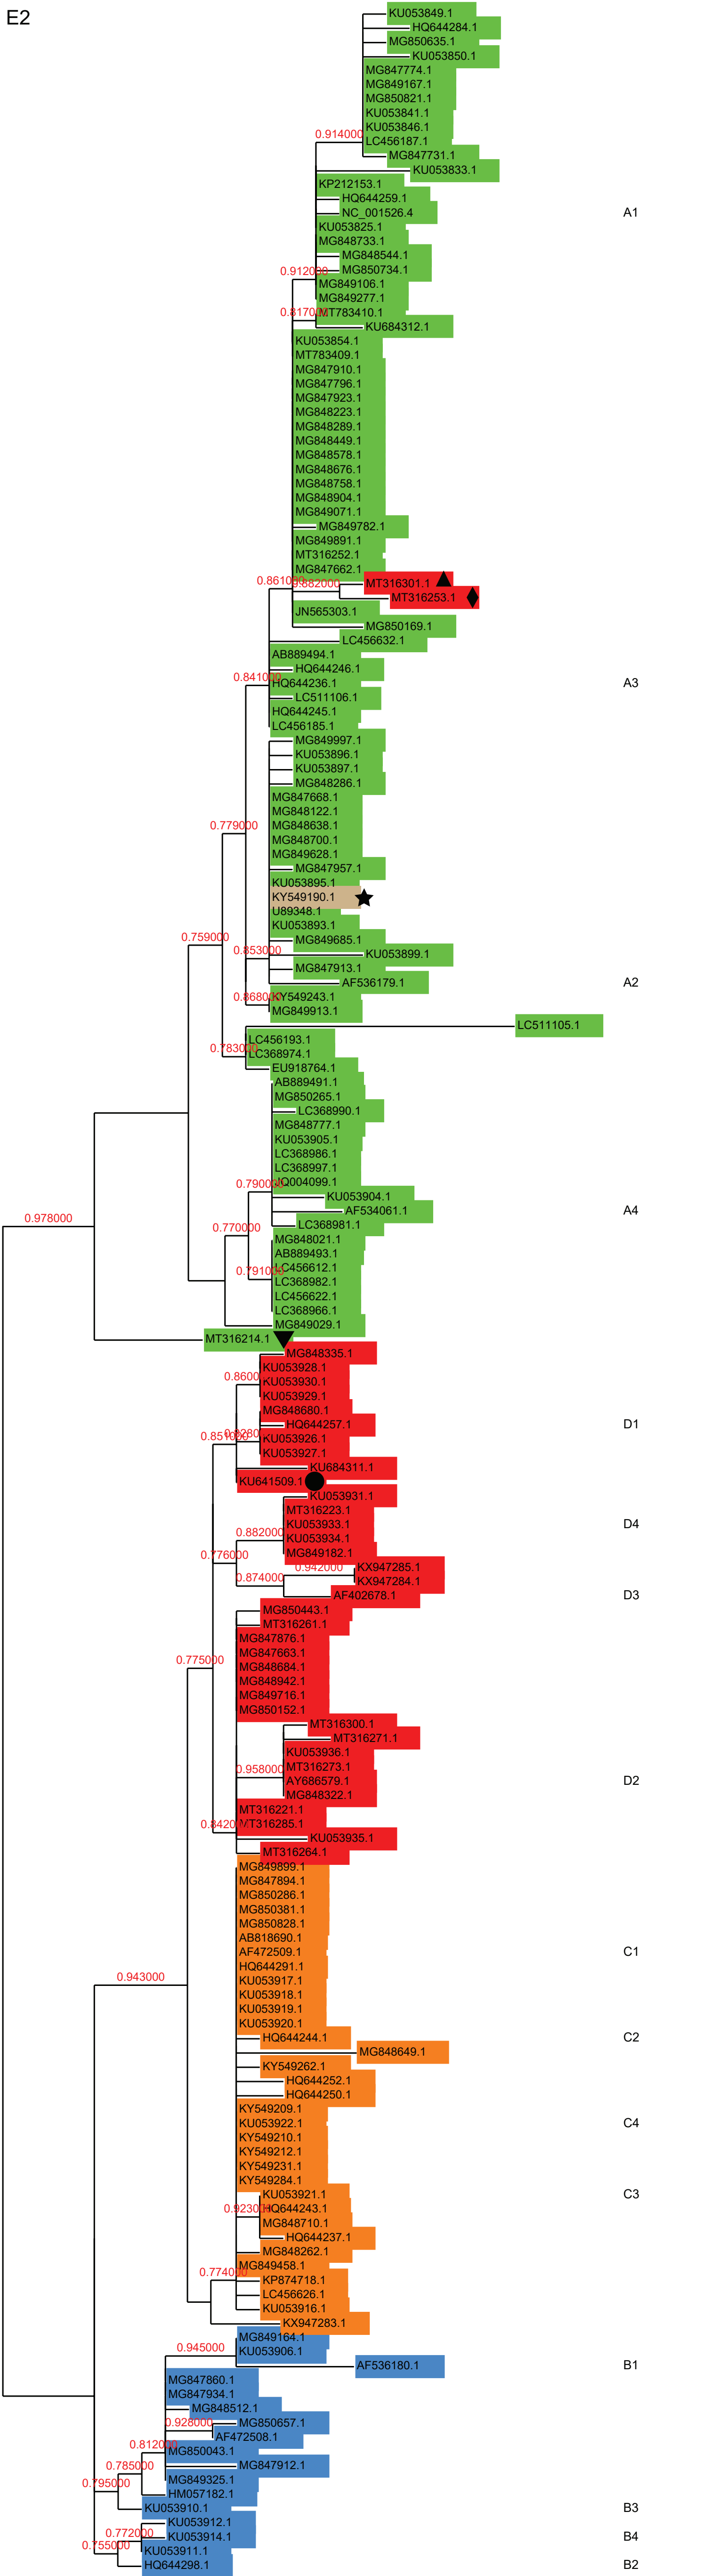



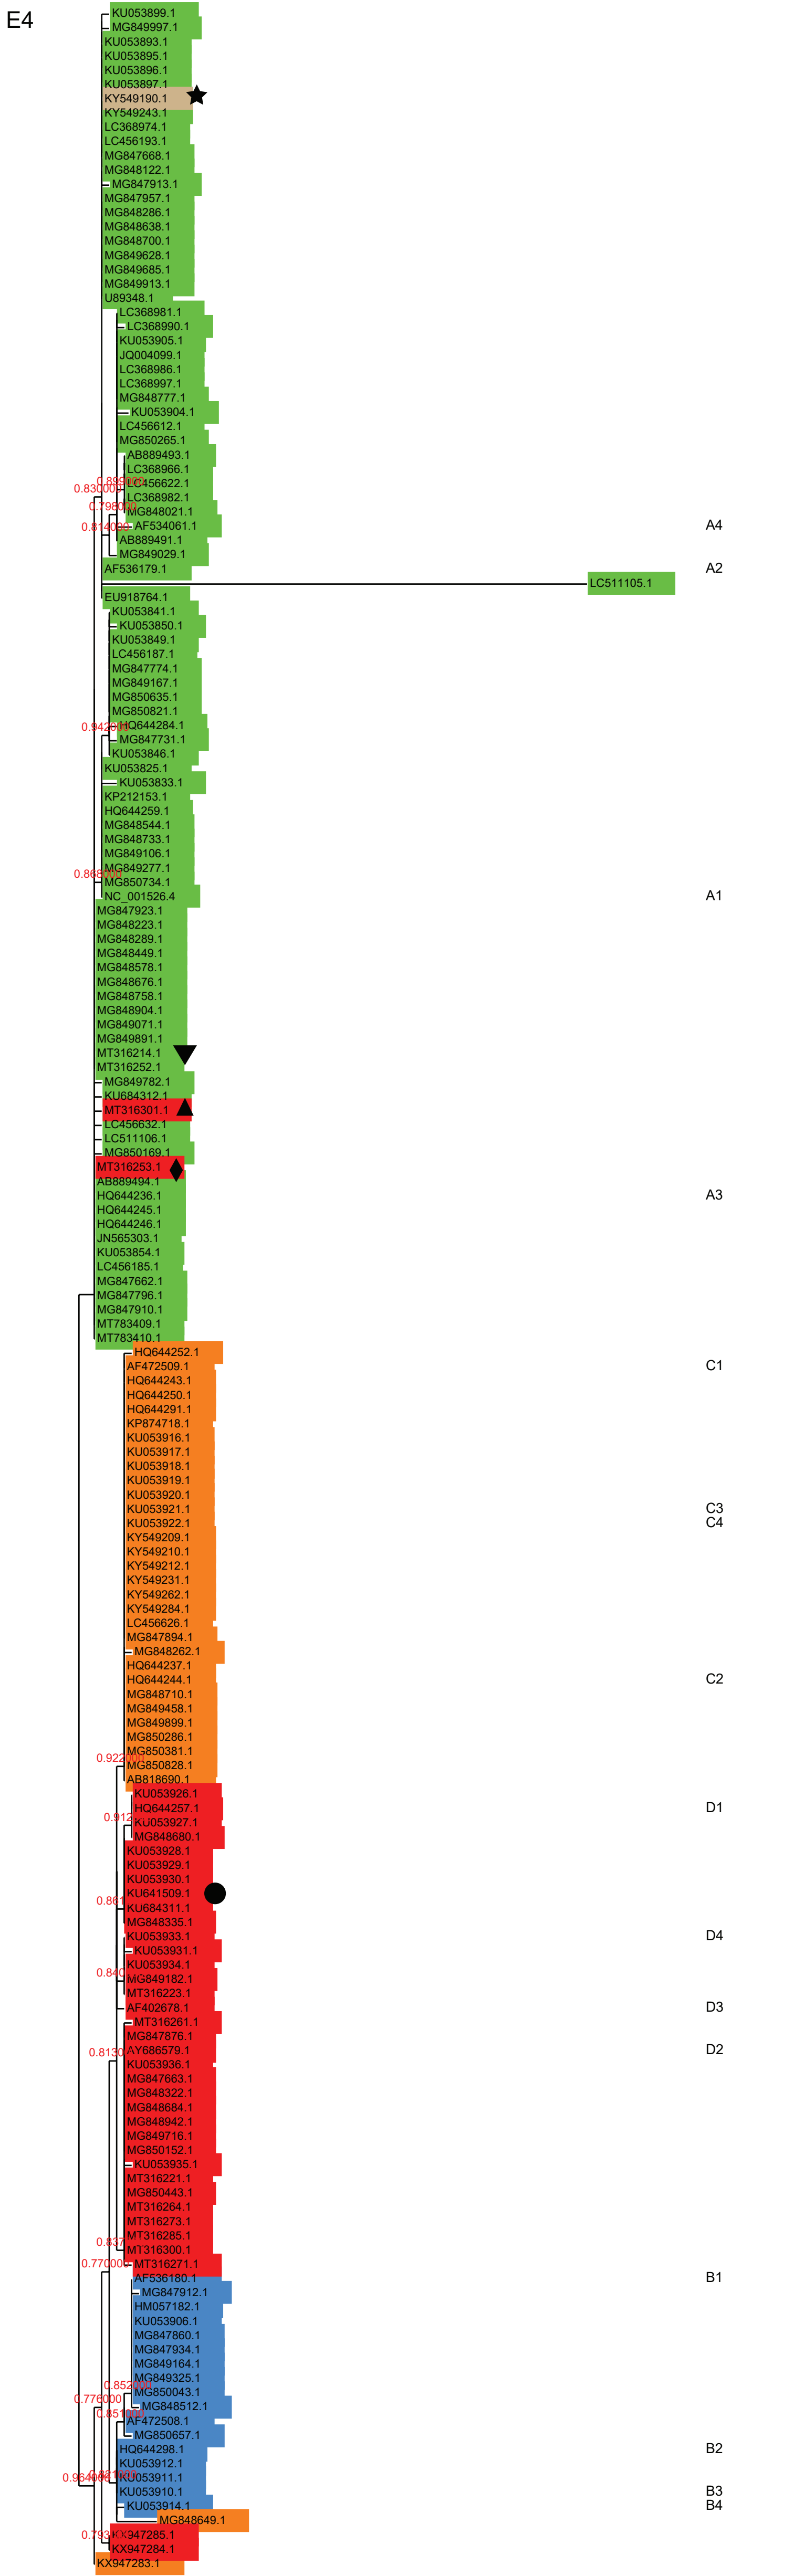

E5

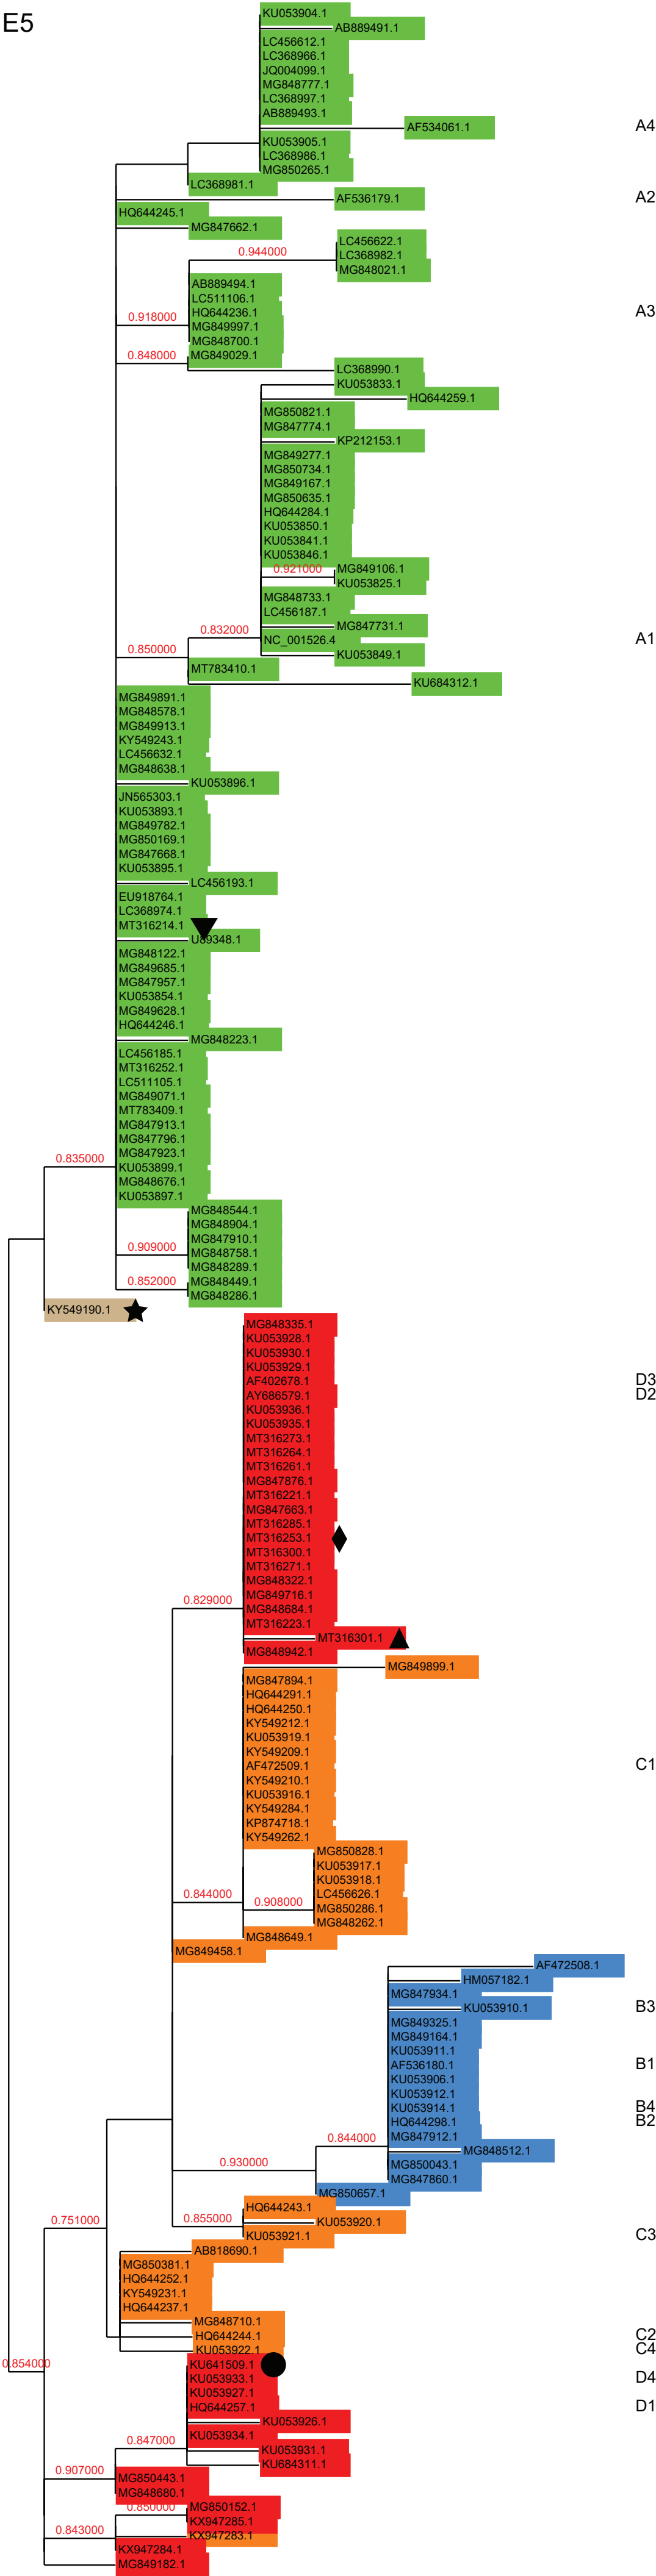

E2\_E5

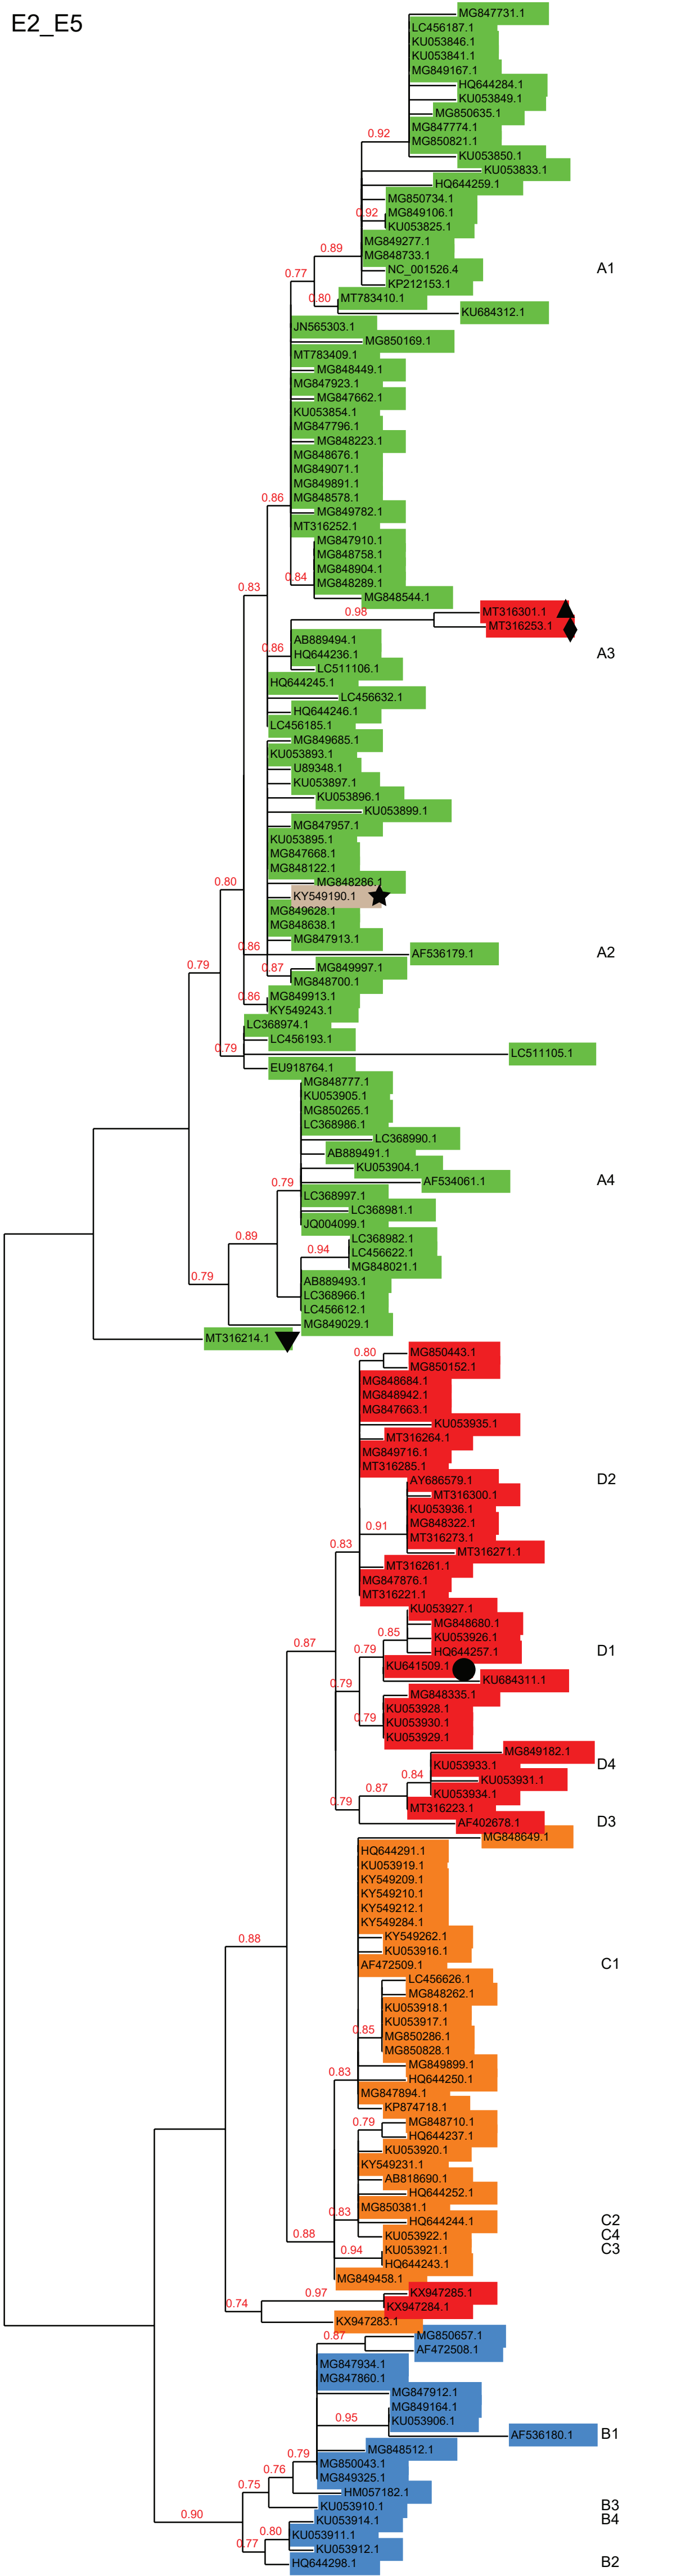

## L2

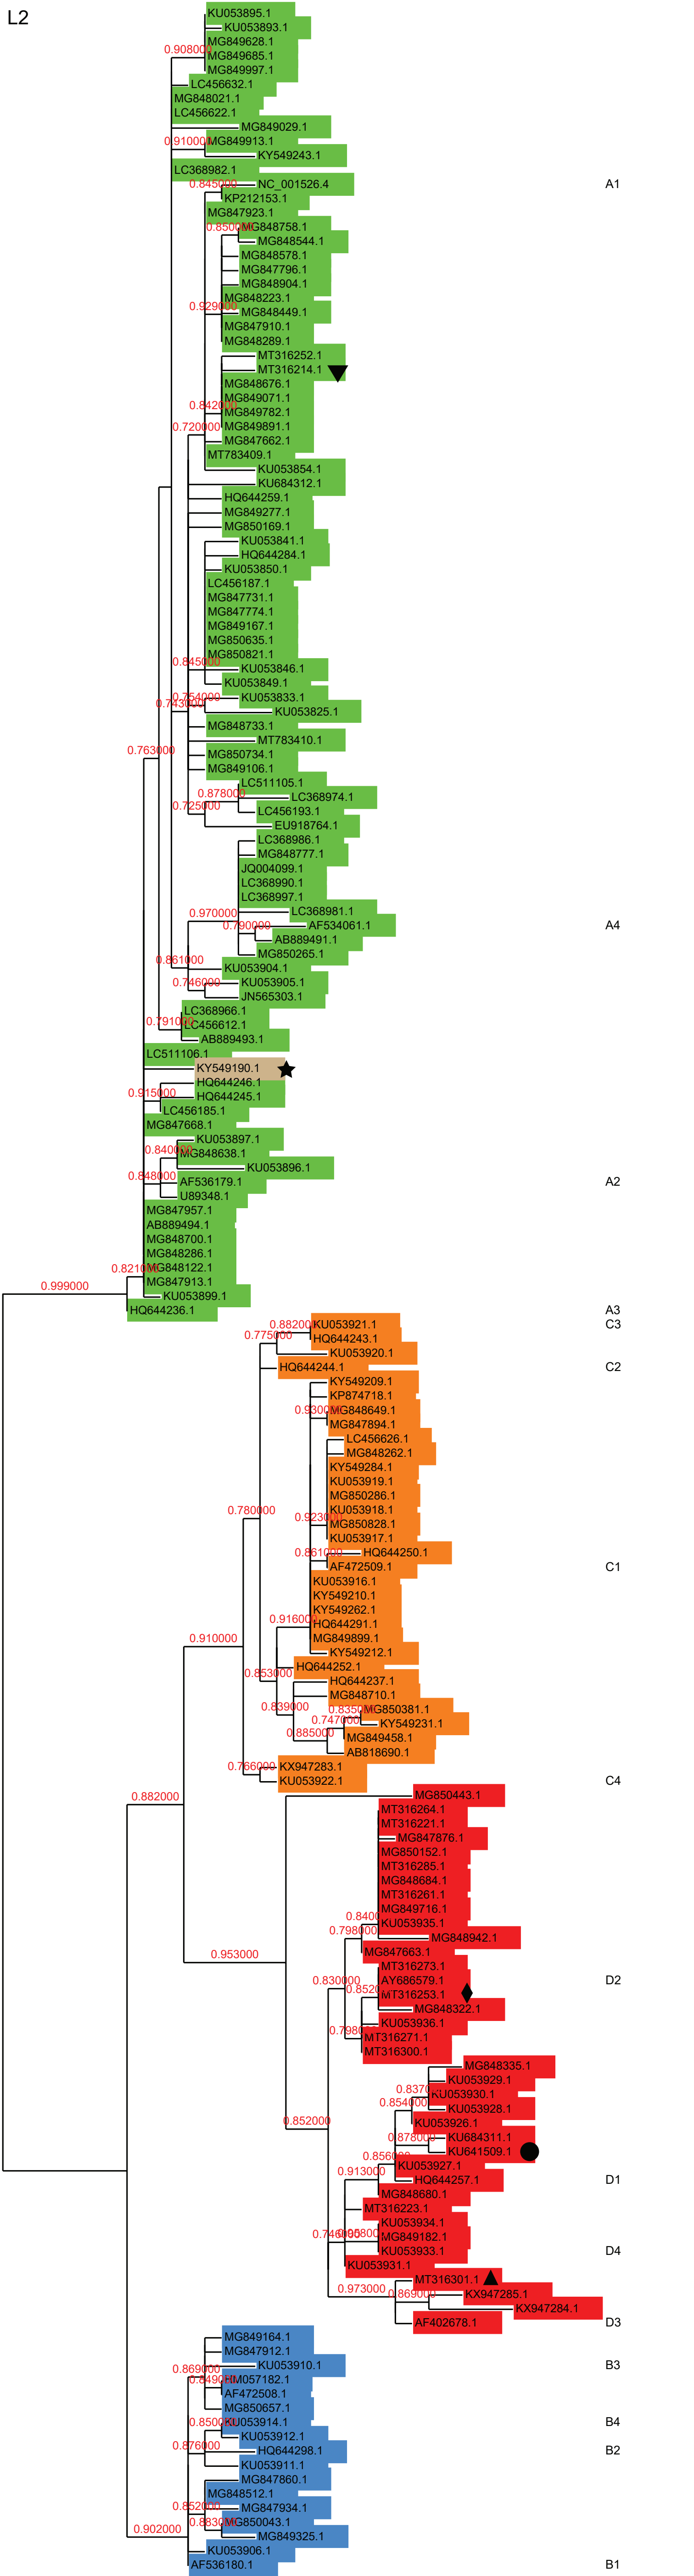

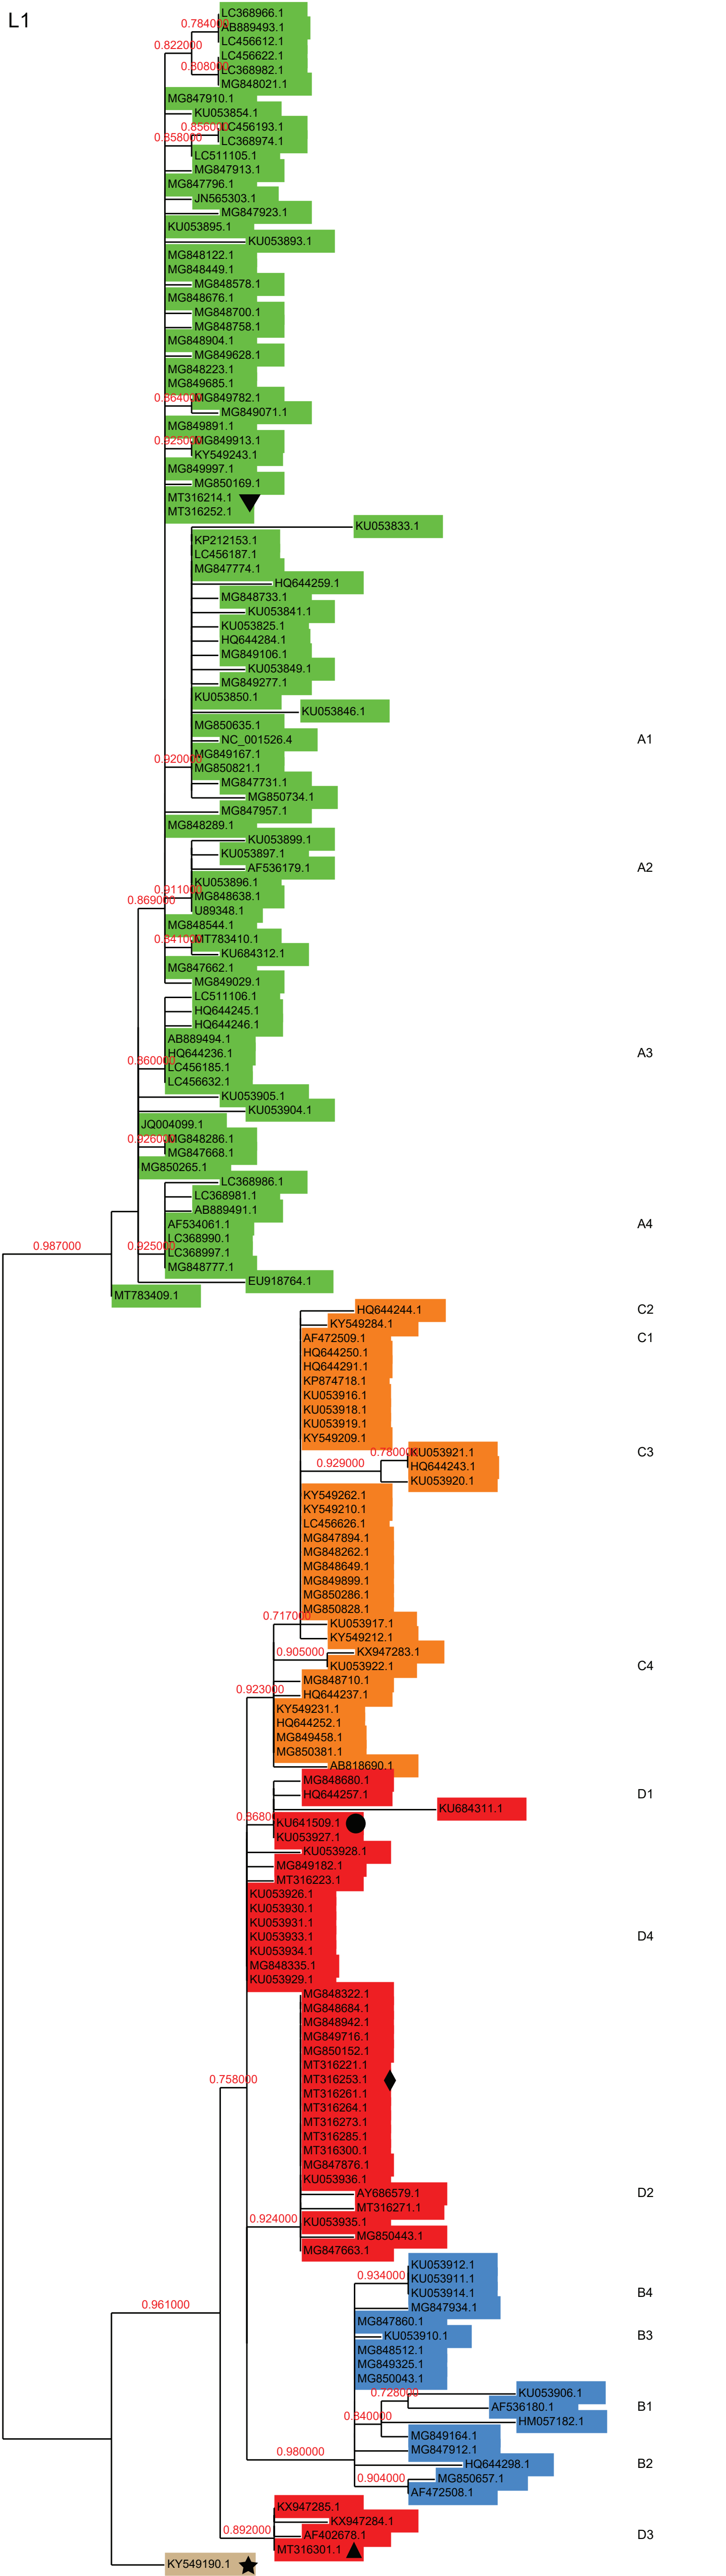

Supplement: s1 [file s1]
